# Supplementary material
Source: PubMed Central journal article supplement (PMC4212655)

## Supporting Information

|                                                                                                    |     |
|----------------------------------------------------------------------------------------------------|-----|
| General Information.....                                                                           | S2  |
| Optimization of reaction conditions.....                                                           | S3  |
| General Procedure for Synthesis of ( <i>E</i> )-3-(2-hydroxyphenyl)acrylaldehyde derivatives ..... | S4  |
| General Procedure for NHC-catalyzed reaction .....                                                 | S11 |
| Mechanistic Studies .....                                                                          | S17 |
| Selected NMR Spectra:.....                                                                         | S19 |
| Structure Determination of the dihydrocoumarin by X-ray analysis for <b>2o</b> : .....             | S53 |

## General Information

All reactions were carried out under a nitrogen atmosphere in oven-dried glassware with magnetic stirring.  $\text{CH}_2\text{Cl}_2$ , THF, and toluene were purified by passage through a bed of activated alumina.<sup>1</sup> Reagents were purified prior to use unless otherwise stated following the guidelines of Perrin and Armarego.<sup>2</sup> Purification of reaction products was carried out by flash chromatography using EM Reagent or Silicycle silica gel 60 (230-400 mesh). Analytical thin layer chromatography was performed on EM Reagent 0.25 mm silica gel 60-F plates. Visualization was accomplished with UV light and potassium permanganate stain followed by heating. Infrared spectra were recorded on a Bruker Tensor 37 FT-IR spectrometer.  $^1\text{H}$ -NMR spectra were recorded on a Bruker Avance 500 MHz w/ direct cryoprobe (500 MHz) spectrometer and are reported in ppm using solvent as an internal standard ( $\text{CDCl}_3$  at 7.26 ppm,  $d_6$ -DMSO at 2.50 ppm). Data are reported as (ap = apparent, s = singlet, d = doublet, t = triplet, q = quartet, m = multiplet, b = broad; coupling constant(s) in Hz; integration). Proton-decoupled  $^{13}\text{C}$ -NMR spectra were recorded on a Bruker Avance 500 MHz w/ direct cryoprobe (126 MHz) spectrometer and are reported in ppm using solvent as an internal standard ( $\text{CDCl}_3$  at 77.0 ppm,  $d_6$ -DMSO at 39.5 ppm).  $^{31}\text{P}$ -NMR spectra were recorded on a 400 MHz Agilent 400MR-DD2 spectrometer equipped with an OneNMR probe and a 7600AS autosampler. Mass spectra data were obtained on a Gas Chromatography Mass Spectrometer (Agilent 7890A/5975C GCMS System).

(*E*)-3-(2-hydroxyphenyl)acrylaldehyde derivatives were prepared according to reported protocol.<sup>3</sup>

- 
- [1] A. B. Pangborn, M. A. Giardello, R. H. Grubbs, R. K. Rosen, F. J. Timmers, *Organometallics* **1996**, *15*, 1518.  
[2] D. D. Perrin, W. L. Armarego, *Purification of Laboratory Chemicals*; 3rd Ed., Pergamon Press, Oxford. 1988.  
[3] L. Zu, S. Zhang, H. Xie, W. Wang, *Org. Lett.* **2009**, *11*, 1627.  
[4] A. M. Sawayama, H. Tanaka, T. J. Wandless, *J. Org. Chem.* **2004**, *69*, 8810.  
[5] P. W. N. M. van Leeuwen, P. C. J. Kamer, J. N. H. Reek, *Pure. Appl. Chem.* **1999**, *71*, 1443.  
[6] M. Murakata, T. Jono, T. Shoji, A. Moriya, Y. Shirai, *Tetrahedron Asymmetry* **2008**, *19*, 2479.  
[7] Y. Kuang, X. Liu, L. Chang, Min. Wang, L. Lin, X. Feng, *Org. Lett.* **2011**, *13*, 3814.

## Optimization of reaction conditions

Selected examples of solvents:

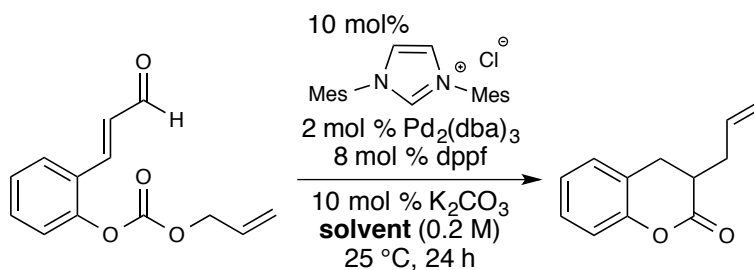

| entry | solvent                              | yield      |
|-------|--------------------------------------|------------|
| 1     | THF                                  | 29%        |
| 2     | CH <sub>2</sub> ClCH <sub>2</sub> Cl | 44%        |
| 3     | benzene                              | 28%        |
| 4     | toluene                              | 47%        |
| 5     | PhCl                                 | 56%        |
| 6     | <b>CH<sub>2</sub>Cl<sub>2</sub></b>  | <b>56%</b> |

Selected examples of ligand optimization:<sup>5</sup>

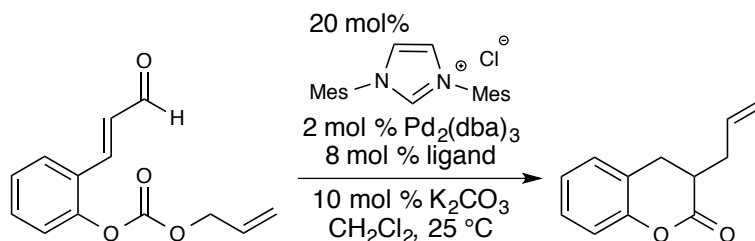

|                        |      |      |      |
|------------------------|------|------|------|
|                        |      |      |      |
| natural bite angle 99° | 102° | 110° | 131° |
| yield 61%              | 55%  | 62%  | 8%   |

## General Procedure for Synthesis of (*E*)-3-(2-hydroxyphenyl)acrylaldehyde derivatives

### Method A:

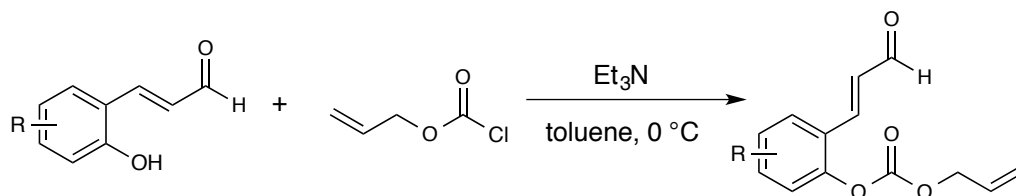

To a solution of the (*E*)-3-(2-hydroxyphenyl)acrylaldehyde derivative (1.0 equiv) in toluene (0.2 M) was added Et<sub>3</sub>N (1.3 equiv) at 0 °C. Then allyl chloroformate (1.2 equiv) was added slowly. The reaction mixture was stirred for 2 h at room temperature. Then water was added to quench the reaction and organic phase was separated. The aqueous solution was extracted with EtOAc for three times. The combined organic phase was washed with brine and dried over Na<sub>2</sub>SO<sub>4</sub>. After evaporation of the volatile, the residue was purified by column chromatography (Hexane:EtOAc = 10:1) to afford the products as colorless oil/solid.

### Method B:

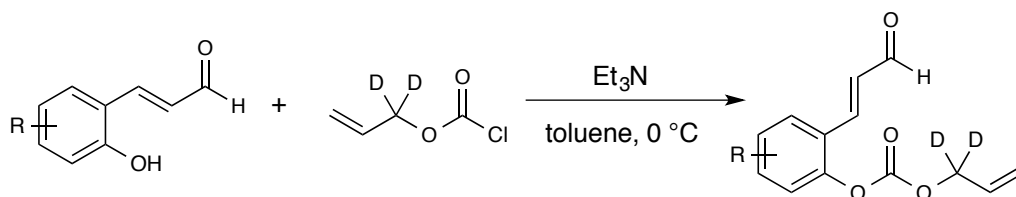

Freshly prepared *d*<sub>2</sub>-allyl chloroformate<sup>4</sup> derivative (1.5 equiv) was added slowly to a solution of (*E*)-3-(2-hydroxyphenyl)acrylaldehyde (1.0 equiv) and Et<sub>3</sub>N (2.0 equiv) in toluene (0.2 M) at 0 °C. The reaction mixture was stirred for 2 h at room temperature. Then water was added to quench the reaction and organic phase was separated. The aqueous solution was extracted with EtOAc for three times. The combined organic phase was washed with brine and dried over Na<sub>2</sub>SO<sub>4</sub>. After evaporation of the volatile, the residue was purified by column chromatography (Hexane:EtOAc = 10:1) to afford the product as colorless oil.

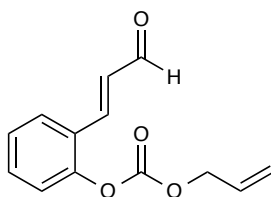

**(*E*)-allyl (2-(3-oxoprop-1-en-1-yl)phenyl) carbonate (1a):** Prepared according to Method A using (*E*)-3-(2-hydroxyphenyl)acrylaldehyde (1.48 g, 10.00 mmol). The residue was purified using column chromatography to afford **1a** as colorless oil (2.05 g, 88%). Analytical data for **1a**: <sup>1</sup>H NMR (500 MHz, CDCl<sub>3</sub>) 9.74 (d, *J* = 7.6 Hz, 1H), 7.70 (dd, *J* = 7.8, 1.6 Hz, 1H), 7.68 (d, *J* = 16.1 Hz, 1H), 7.51 (ddd, *J* = 8.2, 7.4, 1.6 Hz, 1H), 7.37 – 7.29 (m, 2H), 6.78 (dd, *J* = 16.1, 7.7

Hz, 1H), 6.07 – 6.02 (m, 1H), 5.49 (dd,  $J = 17.3, 1.3$  Hz, 1H), 5.40 (dd,  $J = 10.5, 1.2$  Hz, 1H), 4.81 (dt,  $J = 5.9, 1.3$  Hz, 2H);  $^{13}\text{C}$  NMR (126 MHz,  $\text{CDCl}_3$ )  $\delta$  193.6, 152.9, 149.5, 145.3, 132.2, 130.8, 130.5, 128.0, 126.7, 126.5, 122.7, 120.0, 69.6; IR (film)  $\text{cm}^{-1}$  3067, 1750, 1706, 1682, 1606, 1487, 1457, 1418, 1263, 1218, 1175, 1124, 1079, 984, 964, 766; LRMS (EI): Mass calcd for  $[\text{M}]^+ \text{C}_{13}\text{H}_{12}\text{O}_4$ : 232.1; found 232.1.

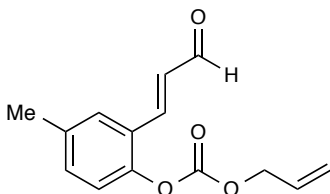

**(E)-allyl (4-methyl-2-(3-oxoprop-1-en-1-yl)phenyl) carbonate (1b):** Prepared according to Method A using (*E*)-3-(2-hydroxy-5-methylphenyl)acrylaldehyde (0.81 g, 5.00 mmol). The residue was purified using column chromatography to afford **1b** as colorless oil (0.77 g, 63%). Analytical data for **1b**:  $^1\text{H}$  NMR (500 MHz,  $\text{CDCl}_3$ ) 9.73 (d,  $J = 7.7$  Hz, 1H), 7.64 (d,  $J = 16.1$  Hz, 1H), 7.48 (d,  $J = 2.0$  Hz, 1H), 7.30 (dd,  $J = 8.4, 2.2$  Hz, 1H), 7.19 (d,  $J = 8.3$ , 1H), 6.75 (dd,  $J = 16.1, 7.7$  Hz, 1H), 6.16 – 6.01 (m, 1H), 5.48 (dq,  $J = 16.9, 1.3$  Hz, 1H), 5.39 (dq,  $J = 10.4, 1.1$  Hz, 1H), 4.86 – 4.74 (m, 2H), 2.41 (s, 3H);  $^{13}\text{C}$  NMR (126 MHz,  $\text{CDCl}_3$ )  $\delta$  193.8, 153.2, 147.5, 145.6, 136.6, 133.0, 130.8, 130.3, 128.3, 126.1, 122.4, 120.0, 69.6, 20.9; IR (film)  $\text{cm}^{-1}$  2954, 1740, 1665, 1629, 1490, 1363, 1297, 1211, 1128, 1108, 979, 952, 778; LRMS (EI): Mass calcd for  $[\text{M}]^+ \text{C}_{14}\text{H}_{14}\text{O}_4$ : 246.1; found 246.0.

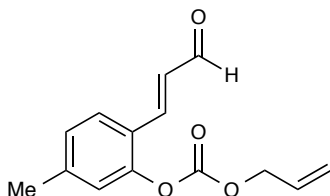

**(E)-allyl (4-methyl-2-(3-oxoprop-1-en-1-yl)phenyl) carbonate (1c):** Prepared according to Method A using (*E*)-3-(2-hydroxy-5-methylphenyl)acrylaldehyde (0.35 g, 2.00 mmol). The residue was purified using column chromatography to afford **1c** as colorless oil (0.39 g, 75%). Analytical data for **1c**:  $^1\text{H}$  NMR (500 MHz,  $\text{CDCl}_3$ ) 9.71 (d,  $J = 7.7$  Hz, 1H), 7.64 – 7.57 (m, 2H), 7.12 – 7.10 (m, 2H), 6.73 (dd,  $J = 16.1, 7.7$  Hz, 1H), 6.07 – 6.01 (m, 1H), 5.49 (dd,  $J = 17.1, 1.4$  Hz, 1H), 5.40 (dd,  $J = 10.4, 1.1$  Hz, 1H), 4.80 (dt,  $J = 5.8, 1.3$  Hz, 2H), 2.43 (s, 3H);  $^{13}\text{C}$  NMR (126 MHz,  $\text{CDCl}_3$ ) 193.9, 153.1, 149.4, 145.6, 143.6, 130.8, 129.6, 127.8, 127.7, 123.7, 123.2, 120.1, 69.7, 21.6; IR (film)  $\text{cm}^{-1}$  2980, 1751, 1681, 1614, 1460, 1399, 1361, 1264, 25, 1188, 1109, 972, 779; LRMS (EI): Mass calcd for  $[\text{M}]^+ \text{C}_{14}\text{H}_{14}\text{O}_4$ : 246.1; found 246.1.

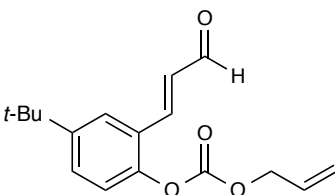

**(E)-allyl (2-(4-tert-butyl-3-oxoprop-1-en-1-yl)phenyl) carbonate (1d):** Prepared according to Method A using (*E*)-3-(2-hydroxy-5-*tert*-butylphenyl)acrylaldehyde (0.41 g, 2.00 mmol). The

residue was purified using column chromatography to afford **1d** as colorless solid (0.43 g, 75%). Analytical data for **1d**:  $^1\text{H}$  NMR (500 MHz,  $\text{CDCl}_3$ ) 9.73 (d,  $J = 7.8$  Hz, 1H), 7.66 (t,  $J = 7.9$  Hz, 2H), 7.52 (d,  $J = 8.5$  Hz, 1H), 7.22 (d,  $J = 8.6$  Hz, 1H), 6.79 (dd,  $J = 16.0, 7.7$  Hz, 1H), 6.06–6.00 (m, 1H), 5.47 (d,  $J = 17.2$  Hz, 1H), 5.38 (d,  $J = 10.4$ , 1H), 4.79 (d,  $J = 6.0$ , 2H), 1.35 (s, 9H);  $^{13}\text{C}$  NMR (126 MHz,  $\text{CDCl}_3$ )  $\delta$  193.8, 153.1, 149.7, 147.4, 146.1, 130.8, 130.2, 129.7, 125.7, 124.8, 122.2, 120.0, 69.6, 34.68, 31.3; IR (film)  $\text{cm}^{-1}$  2954, 1755, 1676, 1629, 1604, 1493, 1381, 1259, 1205, 1132, 1048, 975, 777; LRMS (EI): Mass calcd for  $[\text{M}]^+$   $\text{C}_{17}\text{H}_{20}\text{O}_4$ : 288.1; found 288.1.

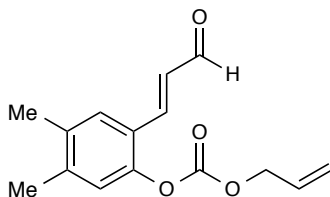

**(E)-allyl (4,5-dimethyl-2-(3-oxoprop-1-en-1-yl)phenyl) carbonate (1e)**: Prepared according to Method A using (*E*)-3-(2-hydroxy-4,5-dimethylphenyl)acrylaldehyde (0.35 g, 2.00 mmol). The residue was purified using column chromatography to afford **1e** as colorless oil (0.39 g, 75%). Analytical data for **1e**:  $^1\text{H}$  NMR (500 MHz,  $\text{CDCl}_3$ ) 9.69 (d,  $J = 7.7$  Hz, 1H), 7.59 (d,  $J = 16.0$  Hz, 1H), 7.43 (s, 1H), 7.07 (s, 1H), 6.72 (dd,  $J = 16.0, 7.7$  Hz, 1H), 6.07 – 5.99 (m, 1H), 5.48 (d,  $J = 17.1$  Hz, 1H), 5.38 (d,  $J = 10.4$  Hz, 1H), 4.79 (d,  $J = 5.8$  Hz, 2H), 2.32 (s, 3H), 2.30 (s, 3H);  $^{13}\text{C}$  NMR (126 MHz,  $\text{CDCl}_3$ )  $\delta$  193.9, 153.3, 147.6, 145.8, 142.2, 135.4, 130.9, 129.4, 128.7, 123.7, 123.5, 120.0, 69.6, 20.2, 19.3; IR (film)  $\text{cm}^{-1}$  2980, 1774, 1744, 1676, 1616, 1362, 1295, 1258, 1236, 1182, 1123, 1035, 990, 780; LRMS (EI): Mass calcd for  $[\text{M}]^+$   $\text{C}_{15}\text{H}_{16}\text{O}_4$ : 260.1; found 260.1.

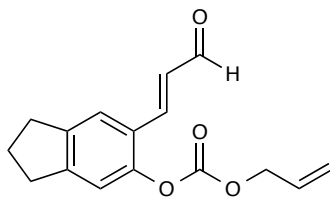

**(E)-allyl (6-(3-oxoprop-1-en-1-yl)-2,3-dihydro-1H-inden-5-yl) carbonate (1f)**: Prepared according to Method A using (*E*)-3-(6-hydroxy-2,3-dihydro-1H-inden-5-yl)acrylaldehyde (0.37 g, 2.00 mmol). The residue was purified using column chromatography to afford **1f** as colorless oil (0.47 g, 86%). Analytical data for **1f**:  $^1\text{H}$  NMR (500 MHz,  $\text{CDCl}_3$ ) 9.69 (d,  $J = 7.7$  Hz, 1H), 7.62 (d,  $J = 15.9$  Hz, 1H), 7.51 (s, 1H), 7.13 (s, 1H), 6.71 (dd,  $J = 15.9, 7.7$  Hz, 1H), 6.07 – 5.99 (m, 1H), 5.47 (d,  $J = 17.1$  Hz, 1H), 5.38 (d,  $J = 10.4$  Hz, 1H), 4.78 (d,  $J = 5.8$  Hz, 2H), 2.98 – 2.92 (m, 4H), 2.17 – 2.11 (m, 2H);  $^{13}\text{C}$  NMR (126 MHz,  $\text{CDCl}_3$ ) 193.9, 153.3, 150.0, 148.4, 146.2, 143.0, 130.9, 129.2, 124.2, 123.0, 119.9, 118.5, 69.6, 33.3, 32.2, 25.6; IR (film)  $\text{cm}^{-1}$  2980, 1774, 1743, 1674, 1616, 1363, 1295, 1256, 1234, 1189, 1122, 1029, 978, 780; LRMS (EI): Mass calcd for  $[\text{M}]^+$   $\text{C}_{16}\text{H}_{16}\text{O}_4$ : 272.1; found 272.1.

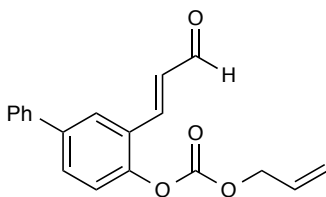

**(E)-allyl (4-phenyl-2-(3-oxoprop-1-en-1-yl)phenyl) carbonate (1g):** Prepared according to Method A using (*E*)-3-(2-hydroxy-5-phenylphenyl)acrylaldehyde (0.45 g, 2.00 mmol). The residue was purified using column chromatography to afford **1g** as colorless oil (0.57 g, 93%). Analytical data for **1g**:  $^1\text{H}$  NMR (500 MHz,  $\text{CDCl}_3$ ) 9.74 (d,  $J = 7.6$  Hz, 1H), 7.83 (d,  $J = 16.1$  Hz, 1H), 7.72 – 7.65 (m, 2H), 7.58 – 7.56 (m, 2H), 7.49 – 7.46 (m, 2H), 7.42 – 7.37 (m, 2H), 6.83 (dd,  $J = 16.1, 7.6$  Hz, 1H), 6.10 – 6.02 (m, 1H), 5.50 (dd,  $J = 17.2, 2.6$  Hz, 1H), 5.41 (d,  $J = 10.4$  Hz, 1H), 4.82 (d,  $J = 5.7$  Hz, 2H);  $^{13}\text{C}$  NMR (126 MHz,  $\text{CDCl}_3$ ) 193.8, 153.2, 149.0, 145.5, 140.2, 139.6, 131.1, 130.9, 129.2, 128.2, 127.3, 126.9, 126.8, 123.2, 120.3, 69.9; IR (film)  $\text{cm}^{-1}$  2980, 1795, 1744, 1670, 1524, 1364, 1321, 1255, 1210, 1187, 1123, 1030, 977, 768; LRMS (EI): Mass calcd for  $[\text{M}]^+$   $\text{C}_{19}\text{H}_{16}\text{O}_4$ : 308.1; found 308.1.

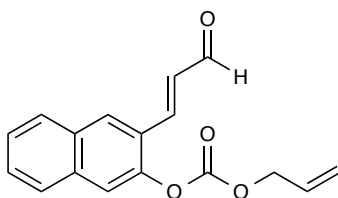

**(E)-allyl (3-(3-oxoprop-1-en-1-yl)naphthalen-2-yl) carbonate (1h):** Prepared according to Method A using (*E*)-3-(2-hydroxy-5-phenylphenyl)acrylaldehyde (0.50 g, 2.50 mmol). The residue was purified using column chromatography to afford **1h** as colorless solid (0.55 g, 78%). Analytical data for **1h**:  $^1\text{H}$  NMR (500 MHz,  $\text{CDCl}_3$ ) 9.73 (d,  $J = 7.7$  Hz, 1H), 7.814 (s, 1H), 7.88 (dd,  $J = 8.2, 1.3$  Hz, 1H), 7.81 – 7.79 (m, 1H), 7.73 – 7.70 (m, 2H), 7.55 – 7.51 (m, 2H), 6.89 (dd,  $J = 16.1, 7.7$  Hz, 1H), 6.06 – 5.98 (m, 1H), 5.48 – 5.44 (m, 1H), 5.38 – 5.35 (m, 1H), 4.79 – 4.77 (m, 2H);  $^{13}\text{C}$  NMR (126 MHz,  $\text{CDCl}_3$ ) 193.8, 153.2, 146.5, 146.3, 134.7, 131.2, 130.8, 129.4, 128.6, 128.4, 127.6, 126.9, 125.8, 120.1, 120.0, 69.7; IR (film)  $\text{cm}^{-1}$  2983, 1797, 1740, 1673, 1525, 1365, 1321, 1255, 1211, 1190, 1125, 1032, 978, 768; LRMS (EI): Mass calcd for  $[\text{M}]^+$   $\text{C}_{17}\text{H}_{14}\text{O}_4$ : 282.1; found 282.1.

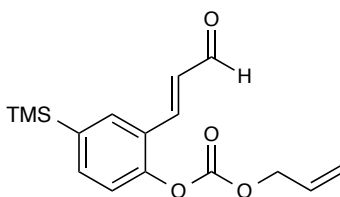

**(E)-allyl (2-(3-oxoprop-1-en-1-yl)phenyl) carbonate (1i):** Prepared according to Method A using (*E*)-3-(2-hydroxy-5-(trimethylsilyl)phenyl)acrylaldehyde (0.44 g, 2.00 mmol). The residue was purified using column chromatography to afford **1i** as colorless oil (0.53 g, 86%). Analytical data for **1i**:  $^1\text{H}$  NMR (500 MHz,  $\text{CDCl}_3$ ) 9.54 (d,  $J = 7.7$  Hz, 1H), 7.59 (d,  $J = 1.7$  Hz, 1H), 7.49 (d,  $J = 16.1$  Hz, 1H), 7.44 (dd,  $J = 8.0, 1.6$  Hz, 1H), 7.10 – 7.04 (m, 1H), 6.61 (dd,  $J = 16.1, 7.7$

Hz, 1H), 5.87 – 5.82 (m, 1H), 5.29 (d,  $J = 17.2, 1.4$  Hz, 1H), 5.20 (dd,  $J = 10.4, 1.4$  Hz, 1H), 4.66 – 4.65 (m, 2H), 0.12 (m, 9H);  $^{13}\text{C}$  NMR (126 MHz,  $\text{CDCl}_3$ ) 193.79, 152.89, 149.99, 145.80, 139.48, 137.25, 133.12, 130.72, 130.41, 125.65, 121.83, 120.05, 69.64, -1.24; IR (film)  $\text{cm}^{-1}$  2981, 1740, 1666, 1630, 1489, 1381, 1297, 1259, 1233, 1211, 1108, 1050, 994, 779; LRMS (EI): Mass calcd for  $[\text{M}]^+ \text{C}_{16}\text{H}_{20}\text{O}_4\text{Si}$ : 304.1; found 304.1.

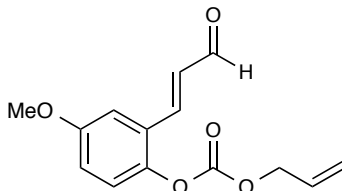

**(*E*)-allyl (2-(4-methoxy-3-oxoprop-1-en-1-yl)phenyl) carbonate (1j):** Prepared according to Method A using (*E*)-3-(2-hydroxy-5-methoxyphenyl)acrylaldehyde (0.35 g, 2.00 mmol). The residue was purified using column chromatography to afford **1j** as colorless solid (0.45 g, 86%). Analytical data for **1j**:  $^1\text{H}$  NMR (500 MHz,  $\text{CDCl}_3$ ) 9.72 (d,  $J = 7.8$  Hz, 1H), 7.61 (d,  $J = 16.1$  Hz, 1H), 7.20 (d,  $J = 9.0$  Hz, 1H), 7.13 (s, 1H), 7.02 (d,  $J = 9.0$  Hz, 1H), 6.73 (dd,  $J = 15.8, 7.7$  Hz, 1H), 6.05 – 5.99 (m, 1H), 5.46 (d,  $J = 17.2$  Hz, 1H), 5.37 (d,  $J = 10.5$ , 1H), 4.78 (d,  $J = 6.2$ , 2H), 3.85 (s, 3H);  $^{13}\text{C}$  NMR (126 MHz,  $\text{CDCl}_3$ )  $\delta$  193.7, 157.6, 153.3, 145.3, 143.3, 130.8, 130.5, 127.2, 123.6, 120.0, 118.1, 111.7, 69.6, 55.7; IR (film)  $\text{cm}^{-1}$  2980, 1744, 1673, 1495, 1443, 1420, 1282, 1246, 1205, 1146, 975, 936, 780; LRMS (EI): Mass calcd for  $[\text{M}]^+ \text{C}_{14}\text{H}_{14}\text{O}_5$ : 262.2; found 262.0.

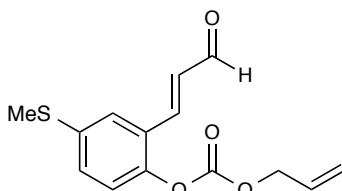

**(*E*)-allyl (4-(methylthio)-2-(3-oxoprop-1-en-1-yl)phenyl) carbonate (1k):** Prepared according to Method A using (*E*)-3-(2-hydroxy-5-(methylthio)phenyl)acrylaldehyde (0.44 g, 2.00 mmol). The residue was purified using column chromatography to afford **1k** as colorless solid (0.53 g, 86%). Analytical data for **1k**:  $^1\text{H}$  NMR (500 MHz,  $\text{CDCl}_3$ ) 9.70 (d,  $J = 7.6$  Hz, 1H), 9.59 (d,  $J = 16.1$ , 1H), 7.47 (d,  $J = 2.4$  Hz, 1H), 7.33 (dd,  $J = 8.6, 2.3$  Hz, 1H), 7.21 (d,  $J = 8.6$  Hz, 1H), 6.73 (dd,  $J = 16.0, 7.6$  Hz, 1H), 6.03 – 5.97 (m, 1H), 5.47 – 5.43 (m, 1H), 5.36 (d,  $J = 10.3$  Hz, 1H), 4.76 (d,  $J = 6.0$ , 2H), 2.50 (s, 3H);  $^{13}\text{C}$  NMR (126 MHz,  $\text{CDCl}_3$ ) 193.6, 153.0, 147.0, 144.8, 137.4, 130.8, 130.7, 130.2, 126.9, 125.5, 123.1, 120.2, 69.8, 16.2; IR (film)  $\text{cm}^{-1}$  2954, 1786, 1744, 1673, 1618, 1524, 1461, 1363, 1293, 1255, 1212, 1186, 1125, 978, 777; LRMS (EI): Mass calcd for  $[\text{M}]^+ \text{C}_{14}\text{H}_{14}\text{O}_4\text{S}$ : 278.1; found 278.0.

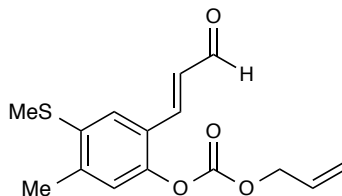

**(*E*)-allyl (5-methyl-4-(methylthio)-2-(3-oxoprop-1-en-1-yl)phenyl) carbonate (1l):** Prepared according to Method A using (*E*)-3-(2-hydroxy-4-methyl-5-(methylthio)phenyl)acrylaldehyde



(0.42 g, 2.00 mmol). The residue was purified using column chromatography to afford **1l** as colorless solid (0.57 g, 97%). Analytical data for **1l**:  $^1\text{H}$  NMR (500 MHz,  $\text{CDCl}_3$ ) 9.70 (d,  $J = 8.1$  Hz, 1H), 7.60 (d,  $J = 16.1$  Hz, 1H), 7.36 (s, 1H), 7.09 (s, 1H), 6.73 (dd,  $J = 15.3, 7.9$  Hz, 1H), 6.06 – 5.98 (m, 1H), 5.47 (d,  $J = 17.3$  Hz, 1H), 5.38 (d,  $J = 10.6$  Hz, 1H), 4.78 (d,  $J = 6.7$ , 2H), 2.50 (s, 3H), 2.37 (s, 3H);  $^{13}\text{C}$  NMR (126 MHz,  $\text{CDCl}_3$ ) 193.7, 153.1, 146.7, 145.2, 141.0, 137.0, 130.8, 129.8, 124.5, 123.8, 123.3, 120.1, 69.7, 20.3, 15.5; IR (film)  $\text{cm}^{-1}$  2990, 1745, 1677, 1635, 1517, 1382, 1287, 1270, 1210, 1180, 1121, 1051, 939, 887; LRMS (EI): Mass calcd for  $[\text{M}]^+$   $\text{C}_{15}\text{H}_{16}\text{O}_4\text{S}$ : 292.1; found 292.0.

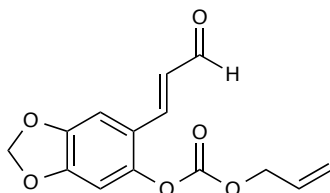

**(E)-allyl (6-(3-oxoprop-1-en-1-yl)benzo[d][1,3]dioxol-5-yl) carbonate (1m)**: Prepared according to Method A using (*E*)-3-(6-hydroxybenzo[d][1,3]dioxol-5-yl)acrylaldehyde (0.33 g, 1.70 mmol) **1m** as colorless solid (0.43 g, 90%). Analytical data for **1m**:  $^1\text{H}$  NMR (500 MHz,  $\text{CDCl}_3$ ) 9.59 (d,  $J = 7.7$ , 1H), 7.49 (d,  $J = 15.9$  Hz, 1H), 6.98 (s, 1H), 6.70 (s, 1H), 6.50 (dd,  $J = 15.9, 7.7$  Hz, 1H), 6.00 (s, 2H), 5.97 – 5.91 (m, 1H), 5.42– 5.41 (m, 1H), 5.32 – 5.29 (m, 1H), 4.70 (dt,  $J = 6.0, 1.3$  Hz, 2H);  $^{13}\text{C}$  NMR (126 MHz,  $\text{CDCl}_3$ ) 193.6, 153.1, 150.9, 146.5, 145.2, 145.0, 130.7, 128.4, 120.2, 119.9, 105.1, 104.0, 102.6, 69.8; IR (film)  $\text{cm}^{-1}$  2981, 1754, 1666, 1626, 1606, 1503, 1492, 1375, 1293, 1248, 1221, 1163, 1121, 1034, 991, 772; LRMS (EI): Mass calcd for  $[\text{M}]^+$   $\text{C}_{14}\text{H}_{12}\text{O}_6$ : 276.0; found 276.0.

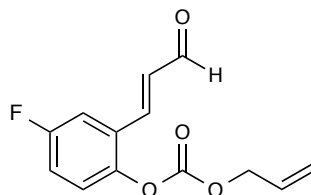

**(E)-allyl (4-fluoro-2-(3-oxoprop-1-en-1-yl)phenyl) carbonate (1n)**: Prepared according to Method A using (*E*)-3-(2-hydroxy-5-fluorophenyl)acrylaldehyde (0.17 g, 1.00 mmol). The residue was purified using column chromatography to afford **1n** as colorless solid (0.23 g, 94%). Analytical data for **1n**:  $^1\text{H}$  NMR (500 MHz,  $\text{CDCl}_3$ ) 9.71 (d,  $J = 7.6$  Hz, 1H), 7.32 (d,  $J = 8.7, 3.0$  Hz, 1H), 7.29 – 7.26 (m, 1H), 7.25 – 7.24 (m, 1H), 7.19 – 7.11 (m, 1H), 6.69 (dd,  $J = 16.1, 7.6$  Hz, 1H), 6.03 – 5.96 (m, 1H), 5.45 (d,  $J = 17.2, 1.4$  Hz, 1H), 5.37 (d,  $J = 10.4, 1.2$  Hz, 1H), 4.76 (dt,  $J = 5.8, 1.3$  Hz, 2H);  $^{13}\text{C}$  NMR (126 MHz,  $\text{CDCl}_3$ ) 193.3, 161.3, 159.3, 153.0, 145.4 (d,  $J_{\text{C-F}} = 2.8$  Hz), 143.9 (d,  $J_{\text{C-F}} = 2.3$  Hz), 131.0 (d,  $J_{\text{C-F}} = 79.4$  Hz), 128.1 (d,  $J_{\text{C-F}} = 8.1$  Hz), 124.3 (d,  $J_{\text{C-F}} = 8.6$  Hz), 120.2, 119.0 (d,  $J_{\text{C-F}} = 23.8$  Hz), 113.9 (d,  $J_{\text{C-F}} = 24.2$  Hz), 69.8; IR (film)  $\text{cm}^{-1}$  3028, 1751, 1683, 1632, 1516, 1460, 1262, 1254, 1185, 1177, 1044, 972, 735; LRMS (EI): Mass calcd for  $[\text{M}]^+$   $\text{C}_{13}\text{H}_{11}\text{FO}_4$ : 250.1; found 250.1.

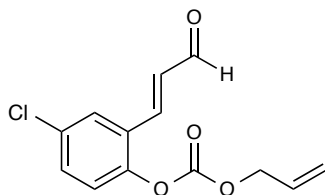

**(E)-allyl (4-chloro-2-(3-oxoprop-1-en-1-yl)phenyl) carbonate (10):** Prepared according to Method A using (*E*)-3-(2-hydroxy-5-fchlorophenyl)acrylaldehyde (0.18 g, 1.00 mmol). The residue was purified using column chromatography to afford **10** as colorless solid (0.24 g, 88%). Analytical data for **10**:  $^1\text{H}$  NMR (500 MHz,  $\text{CDCl}_3$ ) 9.73 (d,  $J = 7.6$  Hz, 1H), 7.64 – 7.57 (m, 2H), 7.45 – 7.43 (m, 1H), 7.29 – 7.26 (m, 1H), 6.73 (dd,  $J = 16.6, 7.7$  Hz, 1H), 6.05 – 5.99 (m, 1H), 5.50 – 5.46 (m, 1H), 5.41 – 5.38 (m, 1H), 4.79 (dt,  $J = 5.8, 1.4$  Hz, 2H);  $^{13}\text{C}$  NMR (126 MHz,  $\text{CDCl}_3$ ) 193.2, 152.7, 147.8, 143.7, 132.3, 131.9, 131.3, 130.6, 128.0, 127.6, 124.1, 120.3, 69.9; IR (film)  $\text{cm}^{-1}$  3064, 1752, 1675, 1634, 1520, 1360, 1256, 1211, 1179, 1122, 1051, 979, 772; LRMS (EI): Mass calcd for  $[\text{M}]^+ \text{C}_{13}\text{H}_{11}\text{ClO}_4$ : 266.0; found 266.0.

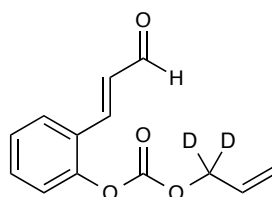

**(E)-allyl-1,1- $d_2$  (2-(3-oxoprop-1-en-1-yl)phenyl) carbonate (8):** Prepared according to Method B using (*E*)-3-(2-hydroxyphenyl)acrylaldehyde (0.59 g, 4.00 mmol) and allyl-1,1- $d_2$  carbonochloridate. The residue was purified using column chromatography to afford **8** as colorless oil (0.34 g, 36%). Analytical data for **6**:  $^1\text{H}$  NMR (500 MHz,  $\text{CDCl}_3$ ) 9.74 (d,  $J = 7.6$  Hz, 1H), 7.70 – 7.66 (m, 2H), 7.53 – 7.49 (m, 1H), 7.37 – 7.29 (m, 2H), 6.77 (dd,  $J = 16.1, 7.6$  Hz, 1H), 6.72 (dd,  $J = 17.2, 10.4$  Hz, 1H), 5.49 (dd,  $J = 17.2, 1.2$  Hz, 1H), 5.04 (dd,  $J = 10.4, 1.2$  Hz, 1H);  $^{13}\text{C}$  NMR (126 MHz,  $\text{CDCl}_3$ ) 193.7, 152.9, 149.5, 145.4, 132.3, 130.7, 130.5, 128.0, 126.8, 126.5, 122.7, 120.3, 69.1 (p,  $J = 22.6, 22.2$  Hz); IR (film)  $\text{cm}^{-1}$  2982, 1751, 1667, 1625, 1375, 1248, 1162, 1123, 1025, 991, 772; LRMS (EI): Mass calcd for  $[\text{M}]^+ \text{C}_{13}\text{H}_{10}\text{D}_2\text{O}_4$ : 234.1; found 234.0.

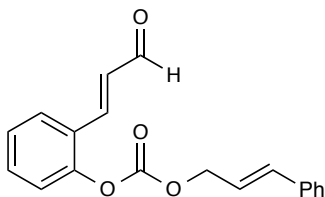

**(E)-cinnamyl (2-(3-oxoprop-1-en-1-yl)phenyl) carbonate (11):** Prepared according to Method B using (*E*)-3-(2-hydroxyphenyl)acrylaldehyde (0.29 g, 2.00 mmol) and cinnamyl carbonochloridate. The residue was purified using column chromatography to afford **11** as colorless oil (0.25 g, 40%). Analytical data for **9**:  $^1\text{H}$  NMR (500 MHz,  $\text{CDCl}_3$ ) 9.72 (d,  $J = 7.7$  Hz, 1H), 7.71 – 7.68 (m, 2H), 7.52 – 7.49 (m, 1H), 7.47 – 7.44 (m, 2H), 7.41 – 7.29 (m, 5H), 6.80 – 6.77 (m, 2H), 6.40 (dt,  $J = 15.9, 6.6$  Hz, 1H), 4.97 (dd,  $J = 6.8, 1.3$  Hz, 2H);  $^{13}\text{C}$  NMR (126 MHz,  $\text{CDCl}_3$ ) 193.7, 153.0, 149.5, 145.35, 136.2, 135.7, 132.3, 130.5, 128.7, 128.6, 128.0,

126.8, 126.8, 126.5, 122.7, 121.4, 69.8; IR (film)  $\text{cm}^{-1}$  2980, 1754, 1669, 1626, 1485, 1396, 1245, 1217, 1163, 1122, 1096, 1025, 972, 771; LRMS (EI): Mass calcd for  $[\text{M}]^+$   $\text{C}_{19}\text{H}_{16}\text{O}_4$ : 308.1; found 308.1.

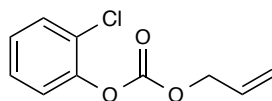

**Allyl (2-chlorophenyl) carbonate (14):** Prepared according to Method A using 2-chlorophenol (1.29 g, 10.00 mmol) and allyl carbonochloridate. The residue was purified using column chromatography to afford **12** as colorless oil (2.09 g, 98%). Analytical data for **12**:  $^1\text{H}$  NMR (500 MHz,  $\text{CDCl}_3$ ) 7.48 (d,  $J = 7.9$ , 1.6 Hz, 1H), 7.34 – 7.30 (m, 1H), 7.29 – 7.23 (m, 2H), 6.06 – 6.00 (m, 1H), 5.47 (dq,  $J = 17.2$ , 1.4 Hz, 1H), 5.37 (dq,  $J = 10.3$ , 1.1 Hz, 1H), 4.80 (dt,  $J = 5.7$ , 1.4 Hz, 2H);  $^{13}\text{C}$  NMR (126 MHz,  $\text{CDCl}_3$ ) 152.6, 147.1, 130.9, 130.5, 127.9, 127.4, 126.9, 123.3, 119.6, 69.6; IR (film)  $\text{cm}^{-1}$  2991, 1764, 1689, 1636, 1517, 1477, 1277, 1242, 1211, 1105, 983, 940, 794; LRMS (EI): Mass calcd for  $[\text{M}]^+$   $\text{C}_{10}\text{H}_9\text{ClO}_3$ : 212.0; found 212.1.

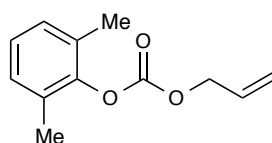

**Allyl (2,6-dimethylphenyl) carbonate (6):** Prepared according to Method A using 2,6-dimethylphenol (2.44 g, 20.00 mmol) and allyl carbonochloridate. colorless oil (3.80 g, 92%). Analytical data:  $^1\text{H}$  NMR (500 MHz,  $\text{CDCl}_3$ ) 7.09 (br, 3H), 6.05 – 6.00 (m, 1H), 5.46 (dt,  $J = 17.1$ , 1.4 Hz, 1H), 5.36 (dd,  $J = 10.4$ , 1.3 Hz, 1H), 4.78 (d,  $J = 5.6$  Hz, 2H), 2.24 (s, 6H);  $^{13}\text{C}$  NMR (126 MHz,  $\text{CDCl}_3$ ) 152.8, 148.3, 131.3, 130.2, 128.7, 126.1, 119.4, 69.1, 16.1; IR (film)  $\text{cm}^{-1}$  2981, 1756, 1691, 1652, 1637, 1381, 1236, 1178, 1143, 1047, 984, 767; LRMS (EI): Mass calcd for  $[\text{M}]^+$   $\text{C}_{12}\text{H}_{14}\text{O}_3$ : 206.1; found 206.0.

### General procedure for NHC-catalyzed reaction

Into an oven-dried, screw-capped vial equipped with a magnetic stirbar was weighed  $\text{Pd}_2(\text{dba})_3$  (0.016 mmol, 0.04 equiv) and dppf (0.064 mmol, 0.16 equiv) in a nitrogen-filled drybox. The vial was capped with a septum cap and degassed  $\text{CH}_2\text{Cl}_2$  (0.6 mL) was added into the vial, and the solution was stirred for 10 min.

Into another oven-dried, screw-capped vial equipped with a magnetic stirbar was weighed aldehyde **1** (0.400 mmol, 1 equiv). The vial was taken into a nitrogen-filled drybox at which time azolium salt **A** (0.08 mmol, 0.20 equiv) was added. Into the vial were then successively added  $\text{CH}_2\text{Cl}_2$  (1.0 mL) and the premixed Pd-dppf solution via cannula (washed with  $2 \times 0.2$  mL degassed  $\text{CH}_2\text{Cl}_2$ ). Then allyl 2-chlorophenylcarbonate **12** (0.400 mmol, 1.0 equiv) was added via a syringe. The reaction was stirred at room temperature in drybox for 24 h (all reactions were completed within 24 h). The reaction mixture was filtered over a short pad of silica gel eluted with dichloromethane and concentrated under reduced pressure. Purification by flash chromatography with EtOAc/hexanes afforded the corresponding 3-allyldihydrocoumarins.

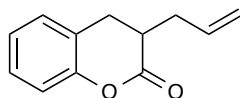

**3-allyl-dihydrocoumarin (2a):**<sup>6</sup> Prepared according to the general procedure using **1a**. The NMR yield was determined using Me<sub>3</sub>SiPh as internal standard. The unpurified residue was purified by flash chromatography using 5% EtOAc/hexanes to afford **2a** as a colorless oil. Analytical data for **2a**: <sup>1</sup>H NMR (500 MHz, CDCl<sub>3</sub>) δ 7.26 – 7.21 (m, 1H), 7.17 – 7.13 (m, 1H), 7.09 – 7.02 (m, 2H), 5.88 – 5.77 (m, 1H), 5.14 – 5.10 (m, 2H), 2.98 (dd, *J* = 14.6, 5.0 Hz, 1H), 2.81 – 2.65 (m, 3H), 2.37 – 2.29 (m, 1H); LRMS (EI): Mass calcd for [M]<sup>+</sup> C<sub>12</sub>H<sub>12</sub>O<sub>2</sub>: 188.1; found 188.1.

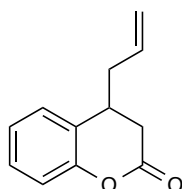

**4-allyl-dihydrocoumarin (3a):**<sup>7</sup> Prepared according to the general procedure using **1a**. The unpurified residue was purified by flash chromatography using 5% EtOAc/hexanes to afford **3a** as a colorless oil. Analytical data for **3a**: <sup>1</sup>H NMR (500 MHz, CDCl<sub>3</sub>) δ 7.27 – 7.20 (m, 1H), 7.19 (dd, *J* = 7.6, 1.6 Hz, 1H), 7.11 – 7.09 (m, 1H), 7.05 (dd, *J* = 8.0, 1.3 Hz, 1H), 5.77 – 5.67 (m, 1H), 5.12 – 5.06 (m, 2H), 3.19 – 3.04 (m, 1H), 2.78 (dd, *J* = 5.2, 2.8 Hz, 2H), 2.46 – 2.39 (m, 1H), 2.32 – 2.25 (m, 1H); (EI): Mass calcd for [M]<sup>+</sup> C<sub>12</sub>H<sub>12</sub>O<sub>2</sub>: 188.1; found 188.0.

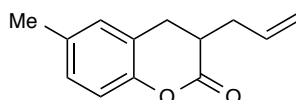

**3-allyl-6-methyldihydrocoumarin (2b):** Prepared according to the general procedure using **1b**. The unpurified residue was purified by flash chromatography using 5% EtOAc/hexanes to afford **2b** as a colorless oil. Analytical data for **2b**: <sup>1</sup>H NMR (500 MHz, CDCl<sub>3</sub>) δ 6.96 (dd, *J* = 8.2, 2.1 Hz, 1H), 6.90 (d, *J* = 2.1 Hz, 1H), 6.85 (d, *J* = 8.3 Hz, 1H), 5.80 – 5.73 (m, 1H), 5.08 – 5.04 (m, 2H), 2.87 (dd, *J* = 14.4, 4.4 Hz, 1H), 2.74 – 2.59 (m, 3H), 2.29 – 2.22 (m, 4H); <sup>13</sup>C NMR (CDCl<sub>3</sub>, 126 MHz) δ 170.7, 149.5, 134.4, 133.9, 128.7, 128.6, 122.2, 118.2, 116.3, 38.8, 33.9, 28.6, 20.8; IR (film) cm<sup>-1</sup> 2980, 1739, 1642, 1625, 1499, 1454, 1379, 1268, 1258, 1210, 1159, 1103, 1025, 886, 775; LRMS (EI): Mass calcd for [M]<sup>+</sup> C<sub>13</sub>H<sub>14</sub>O<sub>2</sub>: 202.1; found 202.1.

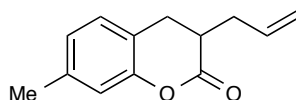

**3-allyl-7-methyldihydrocoumarin (2c):** Prepared according to the general procedure using **1c**. The unpurified residue was purified by flash chromatography using 5% EtOAc/hexanes to afford **2c** as a colorless oil. Analytical data for **2c**: <sup>1</sup>H NMR (500 MHz, CDCl<sub>3</sub>) δ 7.04 (d, *J* = 7.6 Hz, 1H), 6.89 (dd, *J* = 7.6, 1.6 Hz, 1H), 6.84 (d, *J* = 1.4 Hz, 1H), 5.87 – 5.79 (m, 1H), 5.13 – 5.10 (m, 2H), 2.96 – 2.92 (m, 1H), 2.81 – 2.66 (m, 3H), 2.36 – 2.29 (m, 4H); <sup>13</sup>C NMR (CDCl<sub>3</sub>, 126 MHz) δ 170.7, 151.4, 138.5, 134.4, 127.8, 125.1, 119.3, 118.2, 117.0, 38.9, 34.0, 28.3, 21.2; IR (film)

cm<sup>-1</sup> 2978, 1740, 1642, 1625, 1583, 1491, 1437, 1358, 1249, 1218, 1196, 1143, 1105, 1026, 896, 764; LRMS (EI): Mass calcd for [M]<sup>+</sup> C<sub>13</sub>H<sub>14</sub>O<sub>2</sub>: 202.1; found 202.1.

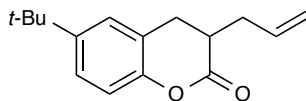

**3-allyl-6-tert-butyl-2H-chromen-2-one (2d):** Prepared according to the general procedure using **1d**. The unpurified residue was purified by flash chromatography using 5% EtOAc/hexanes to afford **2d** as a colorless oil. Analytical data for **2d**: <sup>1</sup>H NMR (500 MHz, CDCl<sub>3</sub>) δ 7.19 – 7.17 (m, 1H), 7.09 (d, *J* = 2.4 Hz, 1H), 6.89 (d, *J* = 8.5 Hz, 1H), 5.82 – 5.73 (m, 1H), 5.08 – 5.08 (m, 2H), 2.90 (dd, *J* = 15.0, 5.0 Hz, 1H), 2.76 – 2.62 (m, 3H), 2.31 – 2.24 (m, 1H), 1.23 (s, 9H); <sup>13</sup>C NMR (CDCl<sub>3</sub>, 126 MHz) δ 170.7, 149.3, 147.4, 134.5, 125.1, 125.0, 121.9, 118.2, 116.0, 38.8, 34.4, 34.0, 31.5, 29.0; IR (film) cm<sup>-1</sup> 2979, 1763, 1707, 1642, 1613, 1498, 1462, 1365, 1272, 1232, 1145, 1125, 1027, 887, 768; LRMS (EI): Mass calcd for [M]<sup>+</sup> C<sub>16</sub>H<sub>20</sub>O<sub>2</sub>: 244.1; found 244.0.

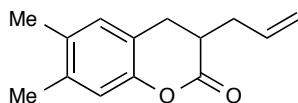

**3-allyl-6,7-dimethyl-2H-chromen-2-one (2e):** Prepared according to the general procedure using **1e**. The unpurified residue was purified by flash chromatography using 5% EtOAc/hexanes to afford **2e** as a colorless oil. Analytical data for **2e**: <sup>1</sup>H NMR (500 MHz, CDCl<sub>3</sub>) δ 6.91 (s, 1H), 6.81 (s, 1H), 5.87 – 5.78 (m, 1H), 5.14 – 5.10 (m, 2H), 2.93 – 2.87 (m, 1H), 2.78 – 2.65 (m, 3H), 2.35 – 2.28 (m, 1H), 2.23 (s, 3H), 2.20 (s, 3H); <sup>13</sup>C NMR (CDCl<sub>3</sub>, 126 MHz) δ 170.9, 149.5, 136.7, 134.5, 132.5, 128.9, 119.3, 118.1, 117.4, 39.0, 34.0, 28.2, 19.6, 19.1; IR (film) cm<sup>-1</sup> 2975, 1759, 1641, 1627, 1503, 1455, 1409, 1275, 1174, 1102, 1021, 866, 771; LRMS (EI): Mass calcd for [M]<sup>+</sup> C<sub>14</sub>H<sub>16</sub>O<sub>2</sub>: 216.1; found 216.1.

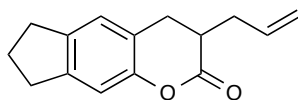

**3-allyl-4,6,7,8-tetrahydrocyclopenta[g]chromen-2(3H)-one (2f):** Prepared according to the general procedure using **1h**. The unpurified residue was purified by flash chromatography using 5% EtOAc/hexanes to afford **2f** as a colorless oil. Analytical data for **2f**: <sup>1</sup>H NMR (500 MHz, CDCl<sub>3</sub>) δ .99 (s, 1H), 6.89 (s, 1H), 5.87 – 5.79 (m, 1H), 5.14 – 5.10 (m, 2H), 2.95 – 2.78 (m, 5H), 2.75 – 2.66 (m, 3H), 2.31 – 2.30 (m, 1H), 2.11 – 2.05 (m, 2H); <sup>13</sup>C NMR (CDCl<sub>3</sub>, 126 MHz) δ 171.0, 150.2, 144.5, 140.2, 134.5, 123.5, 120.0, 118.1, 112.5, 38.9, 33.9, 32.8, 32.2, 28.7, 25.8; IR (film) cm<sup>-1</sup> 3002, 1750, 1640, 1622, 1477, 1426, 1356, 1263, 1258, 1204, 1148, 1107, 998, 870, 751; LRMS (EI): Mass calcd for [M]<sup>+</sup> C<sub>15</sub>H<sub>16</sub>O<sub>2</sub>: 228.1; found 228.1.

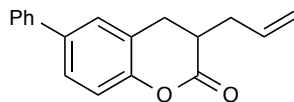

**3-allyl-6-phenyldihydrocoumarin (2g):** Prepared according to the general procedure using **1g**. The unpurified residue was purified by flash chromatography using 5% EtOAc/hexanes to afford **2g** as a colorless solid. Analytical data for **2g**:  $^1\text{H NMR}$  (500 MHz,  $\text{CDCl}_3$ )  $\delta$  7.58 – 7.56 (m, 2H), 7.51 – 7.45 (m, 3H), 7.42 – 7.36 (m, 2H), 7.14 (d,  $J = 8.4$  Hz, 1H), 5.93 – 5.85 (m, 1H), 5.21 – 5.17 (m, 2H), 3.09 (dd,  $J = 15.5, 5.6$  Hz, 1H), 2.93 – 2.74 (m, 3H), 2.44– 2.37 (m, 1H);  $^{13}\text{C NMR}$  ( $\text{CDCl}_3$ , 126 MHz)  $\delta$  170.4, 151.0, 140.1, 137.6, 134.3, 128.9, 127.4, 127.0, 126.9, 126.8, 122.9, 118.4, 116.9, 38.8, 34.0, 28.8; IR (film)  $\text{cm}^{-1}$  2980, 1762, 1706, 1641, 1601, 1507, 1481, 1453, 1354, 1226, 1142, 1120, 1024, 893, 760; LRMS (EI): Mass calcd for  $[\text{M}]^+$   $\text{C}_{18}\text{H}_{16}\text{O}_2$ : 264.1; found 264.1.

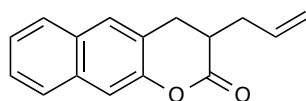

**3-allyl-3,4-dihydro-2H-benzo[g]chromen-2-one (2h):** Prepared according to the general procedure using **1h**. The unpurified residue was purified by flash chromatography using 5% EtOAc/hexanes to afford **2h** as a colorless solid. Analytical data for **2h**:  $^1\text{H NMR}$  (500 MHz,  $\text{CDCl}_3$ )  $\delta$  7.79 – 7.76 (m, 2H), 7.65 (br, 1H), 7.48 – 7.41 (m, 3H), 5.90 – 5.81 (m, 1H), 5.17 – 5.13 (m, 2H), 3.21 – 3.16 (m, 1H), 3.01– 2.95 (m, 1H), 2.82– 2.81 (m, 1H), 2.73– 2.70 (m, 1H), 2.39– 2.33 (m, 1H);  $^{13}\text{C NMR}$  ( $\text{CDCl}_3$ , 126 MHz)  $\delta$  170.5, 149.7, 134.2, 133.1, 130.56, 127.4, 127.3, 127.0, 126.5, 125.5, 123.1, 118.41, 112.8, 39.1, 34.0, 29.1; IR (film)  $\text{cm}^{-1}$  2982, 1764, 1708, 1640, 1603, 1508, 1483, 1455, 1357, 1227, 1142, 1121, 1026, 897, 760; LRMS (EI): Mass calcd for  $[\text{M}]^+$   $\text{C}_{16}\text{H}_{14}\text{O}_2$ : 238.1; found 238.1.

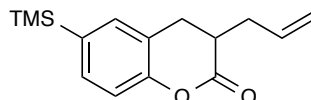

**3-allyl-6-trimethylsilyldihydrocoumarin (2i):** Prepared according to the general procedure using **1i**. The unpurified residue was purified by flash chromatography using 5% EtOAc/hexanes to afford **2i** as a colorless oil. Analytical data for **2i**:  $^1\text{H NMR}$  (500 MHz,  $\text{CDCl}_3$ )  $\delta$  7.38 – 7.36 (m, 1H), 7.28 (s, 1H), 7.01 (d,  $J = 8.0$  Hz, 1H), 5.87 – 5.79 (m, 1H), 5.15 – 5.11 (m, 2H), 2.99 (dd,  $J = 15.1, 5.1$  Hz, 1H), 2.83 – 2.66 (m, 3H), 2.37 – 2.31 (m, 1H), 0.24 (s, 9H);  $^{13}\text{C NMR}$  ( $\text{CDCl}_3$ , 126 MHz)  $\delta$  170.5, 152.2, 136.5, 134.4, 133.3, 133.2, 121.9, 118.2, 116.0, 38.9, 34.0, 28.7, -1.0; IR (film)  $\text{cm}^{-1}$  2980, 1767, 1707, 1642, 1600, 1487, 1440, 1352, 1232, 1143, 1094, 1025, 929, 820; LRMS (EI): Mass calcd for  $[\text{M}]^+$   $\text{C}_{15}\text{H}_{20}\text{O}_2\text{Si}$ : 260.1; found 260.1.

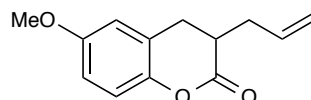

**3-allyl-6-methoxydihydrocoumarin (2j):** Prepared according to the general procedure using **1j**. The unpurified residue was purified by flash chromatography using 10% EtOAc/hexanes to afford **2j** as a colorless solid. Analytical data for **2j**:  $^1\text{H NMR}$  (500 MHz,  $\text{CDCl}_3$ )  $\delta$  6.99 (d,  $J = 8.8$  Hz, 1H), 6.79 (dd,  $J = 8.9, 3.0$  Hz, 1H), 6.71 (d,  $J = 2.9$  Hz, 1H), 5.90 – 5.82 (m, 1H), 5.17 – 5.14 (m, 2H), 3.81 (s, 3H), 2.97 (dd,  $J = 15.1, 5.1$  Hz, 1H), 2.84 – 2.70 (m, 3H), 2.39 – 2.32 (m,

1H);  $^{13}\text{C}$  NMR ( $\text{CDCl}_3$ , 126 MHz)  $\delta$  170.6, 156.1, 145.5, 134.3, 123.5, 118.3, 117.3, 113.2, 113.2, 55.7, 38.7, 33.9, 28.9; IR (film)  $\text{cm}^{-1}$  2980, 1757, 1641, 1593, 1493, 1428, 1354, 1277, 1202, 1147, 1030, 885; LRMS (EI): Mass calcd for  $[\text{M}]^+$   $\text{C}_{13}\text{H}_{14}\text{O}_3$ : 218.1; found 218.1.

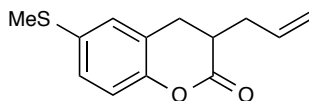

**3-allyl-6-methylthioldihydrocoumarin (2k):** Prepared according to the general procedure using **1k**. The unpurified residue was purified by flash chromatography using 10% EtOAc/hexanes to afford **2k** as a colorless solid. Analytical data for **2k**:  $^1\text{H}$  NMR (500 MHz,  $\text{CDCl}_3$ )  $\delta$  7.14 (d,  $J = 8.4, 2.3$ , Hz, 1H), 7.08 – 7.07 (m, 1H), 6.97 (d,  $J = 8.5$  Hz, 1H), 5.86 – 5.79 (m, 1H), 5.15 – 5.11 (m, 2H), 2.96 (dd,  $J = 14.9, 4.8$  Hz, 1H), 2.81 – 2.62 (m, 3H), 2.46 (s, 3H), 2.35 – 2.30 (m, 1H);  $^{13}\text{C}$  NMR ( $\text{CDCl}_3$ , 126 MHz)  $\delta$  170.2, 149.5, 134.2, 133.9, 127.0, 126.8, 123.3, 118.4, 117.1, 38.6, 33.9, 28.6, 16.7; IR (film)  $\text{cm}^{-1}$  3078, 1750, 1641, 1622, 1479, 1427, 1355, 1263, 1263, 1200, 1148, 1106, 1032, 860, 766; LRMS (EI): Mass calcd for  $[\text{M}]^+$   $\text{C}_{13}\text{H}_{14}\text{O}_2\text{S}$ : 234.1; found 234.1.

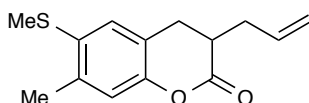

**3-allyl-7-methyl-6-methylthioldihydrocoumarin (2l):** Prepared according to the general procedure using **1l**. The unpurified residue was purified by flash chromatography using 10% EtOAc/hexanes to afford **2l** as a colorless solid. Analytical data for **2l**:  $^1\text{H}$  NMR (500 MHz,  $\text{CDCl}_3$ )  $\delta$  6.95 (s, 1H), 6.84 (s, 1H), 5.86 – 5.78 (m, 1H), 5.14 – 5.10 (m, 2H), 2.96 (dd,  $J = 14.5, 4.6$  Hz, 1H), 2.79 – 2.66 (m, 3H), 2.43 (s, 3H), 2.37 – 2.29 (m, 4H);  $^{13}\text{C}$  NMR ( $\text{CDCl}_3$ , 126 MHz)  $\delta$  170.5, 149.2, 136.6, 134.32, 133.1, 125.2, 120.5, 118.3, 117.9, 38.9, 33.9, 28.4, 19.9, 16.1; IR (film)  $\text{cm}^{-1}$  3078, 1748, 1640, 1501, 1476, 1436, 1397, 1356, 1244, 1157, 1104, 1034, 885, 781; LRMS (EI): Mass calcd for  $[\text{M}]^+$   $\text{C}_{14}\text{H}_{16}\text{O}_2\text{S}$ : 248.1; found 248.1.

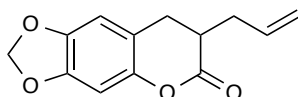

**7-allyl-7,8-dihydro-6H-[1,3]dioxolo[4,5-g]chromen-6-one (2m):** Prepared according to the general procedure using **1m**. The unpurified residue was purified by flash chromatography using 10% EtOAc/hexanes to afford **2m** as solid. Analytical data for **2m**:  $^1\text{H}$  NMR (500 MHz,  $\text{CDCl}_3$ )  $\delta$  6.59 (s, 1H), 6.57 (s, 1H), 5.95 (s, 2H), 5.86 – 5.77 (m, 1H), 5.14 – 5.10 (m, 2H), 2.89 – 2.82 (m, 1H), 2.72 – 2.65 (m, 3H), 2.34 – 2.28 (m, 1H);  $^{13}\text{C}$  NMR ( $\text{CDCl}_3$ , 126 MHz)  $\delta$  170.4, 147.1, 145.9, 144.1, 134.3, 118.3, 114.5, 107.2, 101.6, 98.9, 38.6, 33.8, 28.4; IR (film)  $\text{cm}^{-1}$  2980, 1745, 1641, 1616, 1501, 1474, 1355, 1298, 1260, 1233, 1197, 1105, 1033, 887, 781; LRMS (EI): Mass calcd for  $[\text{M}]^+$   $\text{C}_{13}\text{H}_{12}\text{O}_4$ : 232.1; found 232.0.

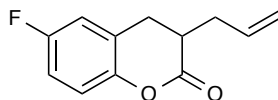

**3-allyl-6-fluorodihydrocoumarin (2n):** Prepared according to the general procedure using **1n**. The unpurified residue was purified by flash chromatography using 5% EtOAc/hexanes to afford **2n** as a colorless solid. Analytical data for **2n**:  $^1\text{H}$  NMR (500 MHz,  $\text{CDCl}_3$ )  $\delta$  7.01 – 6.98 (m, 1H), 6.95 – 6.91 (m, 1H), 6.89 – 6.87 (m, 1H), 5.84 – 5.78 (m, 1H), 5.15 – 5.11 (m, 2H), 2.96 (dd,  $J = 15.4, 5.4$  Hz, 1H), 2.83 – 2.67 (m, 3H), 2.37 – 2.30 (m, 1H);  $^{13}\text{C}$  NMR ( $\text{CDCl}_3$ , 126 MHz)  $\delta$  170.0, 159.9, 158.0, 147.6 (d,  $J_{\text{C-F}} = 2.7$  Hz), 134.0, 124.2 (d,  $J_{\text{C-F}} = 8.1$  Hz), 118.5, 117.8 (d,  $J_{\text{C-F}} = 8.5$  Hz), 114.8 (d,  $J_{\text{C-F}} = 23.7, 18.2$  Hz), 38.3, 33.9, 28.6; IR (film)  $\text{cm}^{-1}$  2980, 1739, 1642, 1597, 1491, 1435, 1270, 1257, 1218, 1196, 1164, 1104, 1025, 894, 776; LRMS (EI): Mass calcd for  $[\text{M}]^+ \text{C}_{12}\text{H}_{11}\text{FO}_2$ : 206.1; found 206.1.

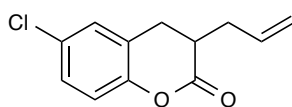

**3-allyl-6-chlorodihydrocoumarin (2o):** Prepared according to the general procedure using **1o**. The unpurified residue was purified by flash chromatography using 5% EtOAc/hexanes to afford **2o** as colorless solid. Analytical data for **2o**:  $^1\text{H}$  NMR (500 MHz,  $\text{CDCl}_3$ )  $\delta$  7.19 – 7.06 (m, 2H), 6.91 (d,  $J = 8.6$  Hz, 1H), 5.79 – 5.71 (m, 1H), 5.10 – 5.06 (m, 2H), 2.92 – 2.88 (m, 1H), 2.76 – 2.61 (m, 3H), 2.30 – 2.24 (m, 1H);  $^{13}\text{C}$  NMR ( $\text{CDCl}_3$ , 126 MHz)  $\delta$  169.7, 150.1, 133.9, 129.4, 128.3, 128.0, 124.2, 118.6, 117.9, 38.4, 33.8, 28.4; IR (film)  $\text{cm}^{-1}$  2980, 1747, 1642, 1479, 1439, 1356, 1233, 1152, 1104, 1026, 896, 767; LRMS (EI): Mass calcd for  $[\text{M}]^+ \text{C}_{12}\text{H}_{11}\text{ClO}_2$ : 222.0; found 222.0.

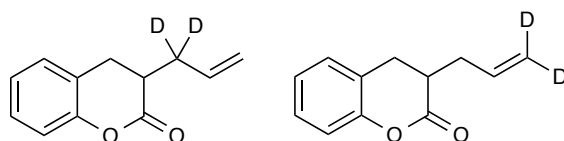

**1:1 ratio of 3-*d*2-allyl-drocoumarins (9) and (10):** Prepared according to the general procedure using **8**. The NMR yield was determined using  $\text{Me}_3\text{SiPh}$  as internal standard. The unpurified residue was purified by flash chromatography using 5% EtOAc/hexanes to afford **9** and **10** as a colorless oil. Analytical data for **9** and **10** (1:1):  $^1\text{H}$  NMR (500 MHz,  $\text{CDCl}_3$ )  $\delta$  7.19 – 7.16 (m, 1H), 7.11 – 7.09 (m, 1H), 7.03 – 7.00 (m, 1H), 6.97 – 6.95 (m, 1H), 5.79 – 5.73 (m, 1H), 5.09 – 5.04 (m, 1H), 2.94 – 2.89 (m, 1H), 2.79 – 2.60 (m, 2.5H), 2.30 – 2.24 (m, 0.5H);  $^{13}\text{C}$  NMR ( $\text{CDCl}_3$ , 126 MHz)  $\delta$  170.5, 151.6, 134.2, 134.1, 128.3, 128.2, 124.4, 122.6, 118.3, 116.6, 38.74, 38.59, 33.8, 28.6, 28.5; IR (film)  $\text{cm}^{-1}$  2980, 1739, 1642, 1625, 1499, 1454, 1379, 1268, 1258, 1210, 1159, 1103, 1025, 886, 775; LRMS (EI): Mass calcd for  $[\text{M}]^+ \text{C}_{12}\text{H}_{10}\text{D}_2\text{O}_2$ : 190.1; found 190.1.



## Mechanistic Studies

Two component reaction of 2-(2-hydroxyphenyl)acrylaldehyde with allyl (2,6-dimethylphenyl)carbonate:<sup>a</sup>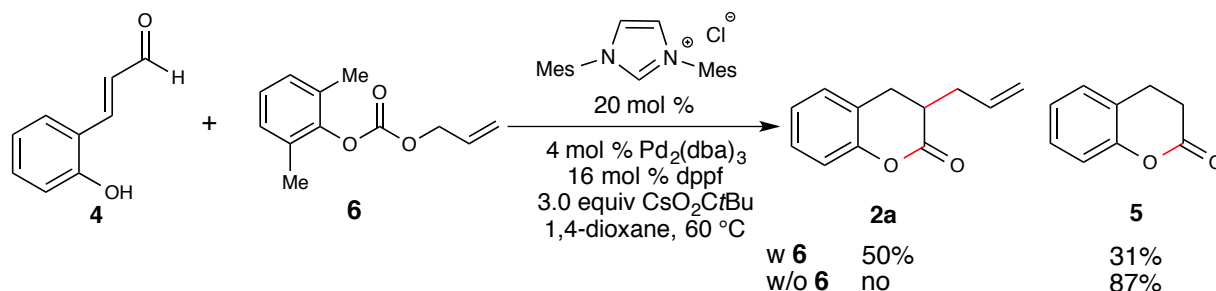

[a] Follow the General procedure of NHC-catalyzed reaction and yield was determined by <sup>1</sup>H NMR (500 MHz).

## Cross over reaction of 1b and 6:

The non cross-over (**2b**, **9**, **10**) and cross-over products (**9b**, **10b**, **2a**) were observed by <sup>1</sup>H NMR in 45% combined yield. However, the chemical shifts of these products were too close to each other to accurately calculate the ratio of products using <sup>1</sup>H NMR. Instead, an alternative cross-over experiment was conducted, which is discussed in the manuscript text.

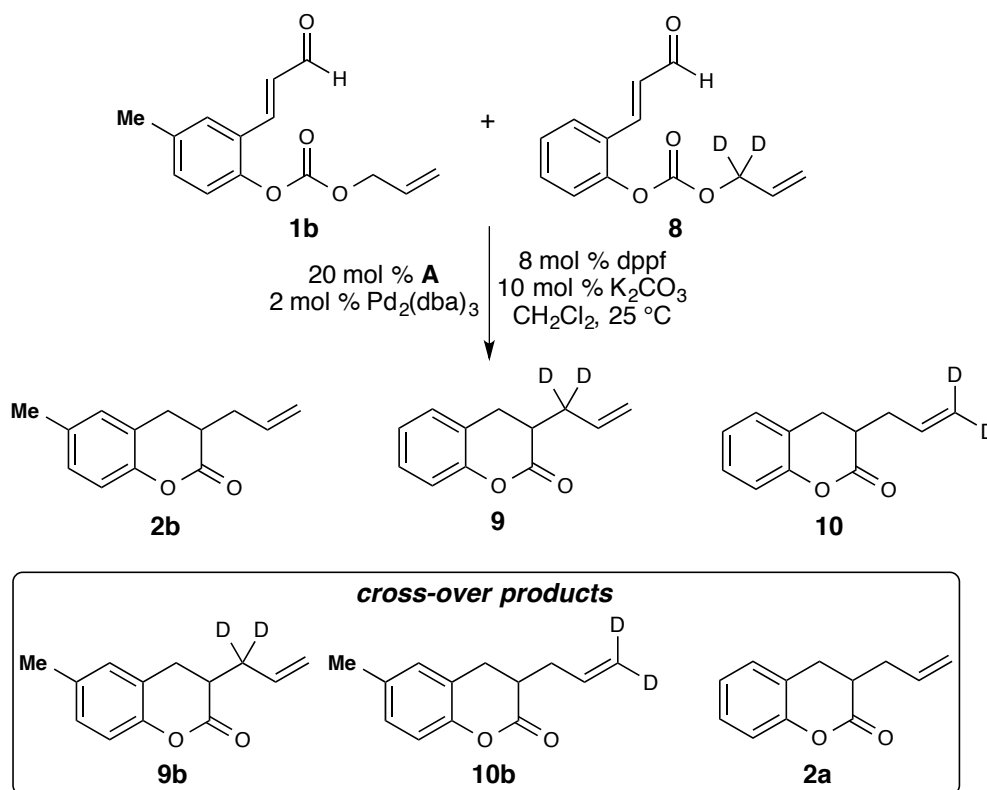

**Procedure for monitoring aldehyde 7 using GC-MS:**

The reaction was set up under the standard reaction condition (0.2 mmol scale, 0.2 M). Aliquot (5  $\mu$ L) was taken from the reaction vial using syringe at indicated time and mixed with dodecane (10  $\mu$ L, 0.1 M in  $\text{CH}_2\text{Cl}_2$ ). The mixture was subjected to GC-MS analysis. The conversion of **1a** and yield of **2a** and **7** was calculated based on the ratio of integrated area relative to dodecane.

**Procedure for allylation of dihydrocoumarin 5:**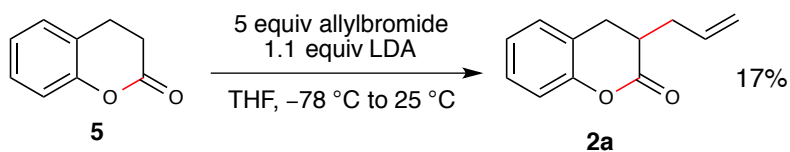

Dihydrocoumarin **5** (1 mmol, 1.0 equiv) was added to freshly prepared LDA in THF (5 mL) at  $-78\text{ }^{\circ}\text{C}$ . After 30 min, freshly distilled allylbromide (5.0 equiv) was added dropwise. The reaction mixture was stirred at  $-78\text{ }^{\circ}\text{C}$  for 5 h and then allowed to slowly warm to room temperature overnight. Ammonium chloride (5 mL, sat. aqueous) was added to quench the reaction, followed by extraction with  $\text{Et}_2\text{O}$  (3 x 10 mL). The combined organic fractions were washed with brine and dried over anhydrous  $\text{Na}_2\text{SO}_4$ . After filtration and evaporation of the volatiles, the crude residue was purified by column chromatography (Hexane:EtOAc = 10:1) to afford the product, **2a** (17%, 31.5 mg).







$^1\text{H}$  NMR Spectra of **1d** (126 MHz,  $\text{CDCl}_3$ ):klu6-09  
PROTON  $\text{CDCl}_3$  (E:\A-500\Scheidt) kls030 33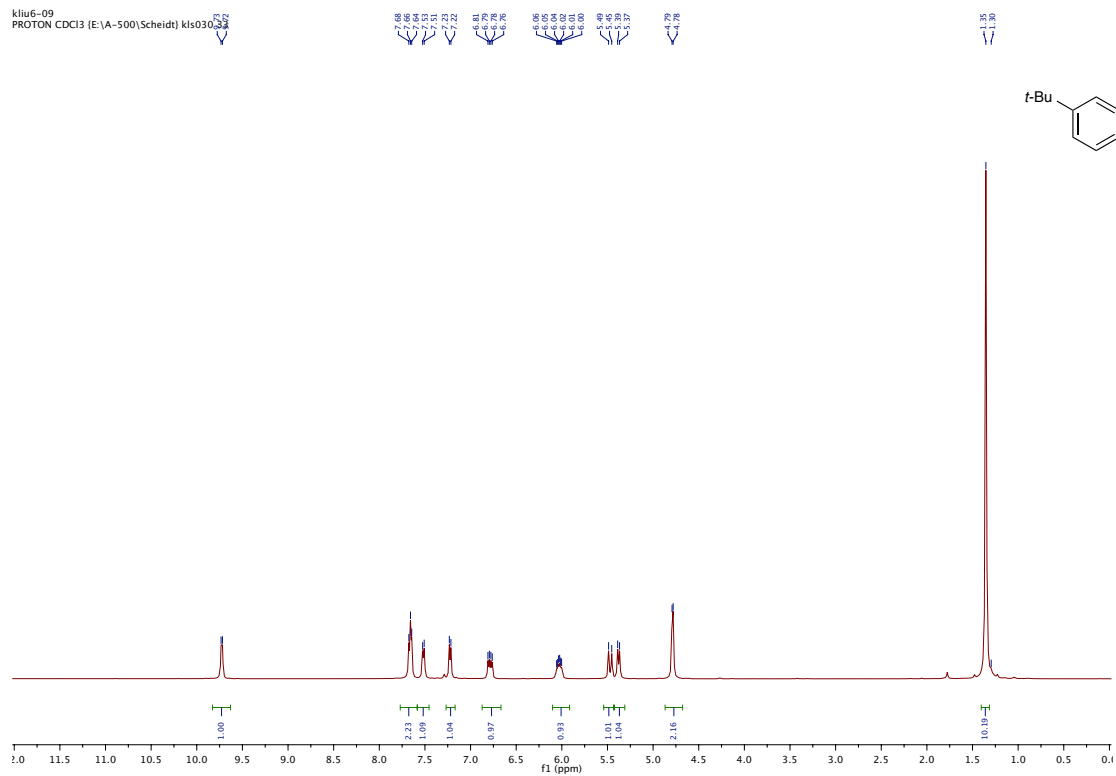 $^{13}\text{C}$  NMR Spectra of **1d** (126 MHz,  $\text{CDCl}_3$ ):klu6-09  
NU\_C13\_5mg  $\text{CDCl}_3$  (E:\A-500\Scheidt) kls030 33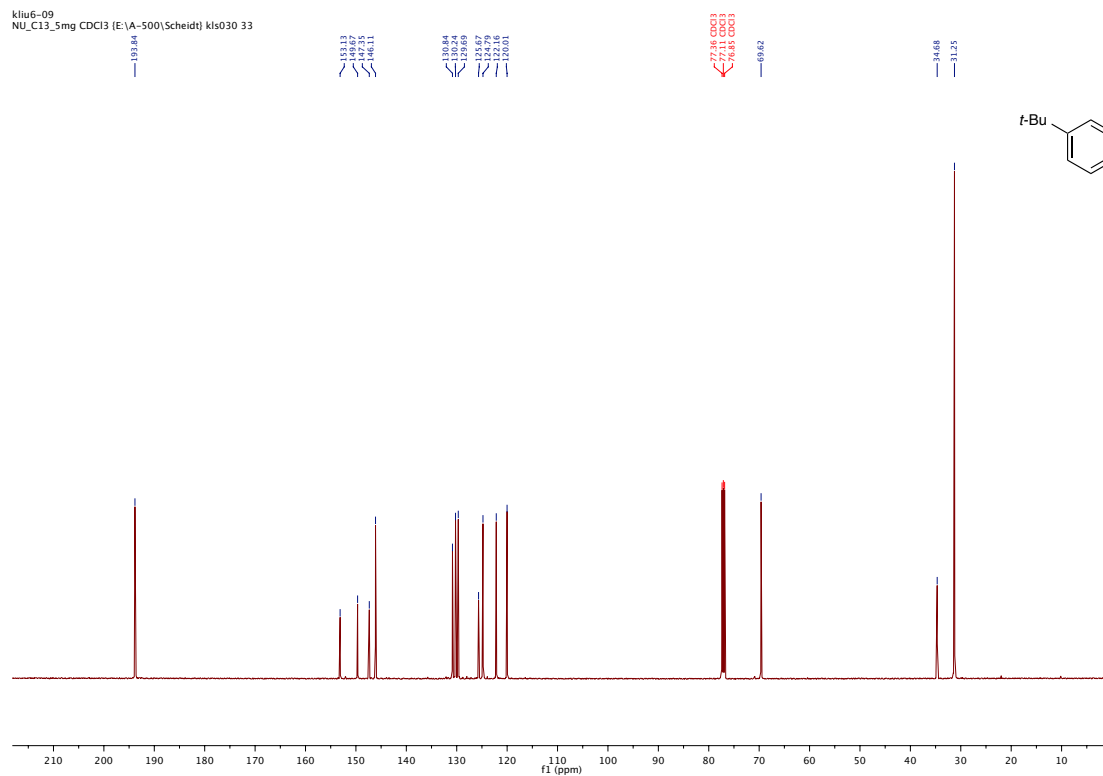



$^1\text{H}$  NMR Spectra of **1f** (500 MHz,  $\text{CDCl}_3$ ):klu7-24  
PROTON CDCl3 (E:\A-500\Scheidt) kls030 300

7.64, 7.51, 7.29, 7.13, 6.72, 6.70, 6.68, 6.00, 5.95, 5.90, 5.85, 5.80, 5.75, 5.70, 5.65, 5.60, 5.55, 5.50, 5.45, 5.40, 5.35, 5.30, 5.25, 5.20, 5.15, 5.10, 5.05, 5.00, 4.95, 4.90, 4.85, 4.80, 4.75, 4.70, 4.65, 4.60, 4.55, 4.50, 4.45, 4.40, 4.35, 4.30, 4.25, 4.20, 4.15, 4.10, 4.05, 4.00, 3.95, 3.90, 3.85, 3.80, 3.75, 3.70, 3.65, 3.60, 3.55, 3.50, 3.45, 3.40, 3.35, 3.30, 3.25, 3.20, 3.15, 3.10, 3.05, 3.00, 2.95, 2.90, 2.85, 2.80, 2.75, 2.70, 2.65, 2.60, 2.55, 2.50, 2.45, 2.40, 2.35, 2.30, 2.25, 2.20, 2.15, 2.10, 2.05, 2.00, 1.95, 1.90, 1.85, 1.80, 1.75, 1.70, 1.65, 1.60, 1.55, 1.50, 1.45, 1.40, 1.35, 1.30, 1.25, 1.20, 1.15, 1.10, 1.05, 1.00, 0.95, 0.90, 0.85, 0.80, 0.75, 0.70, 0.65, 0.60, 0.55, 0.50, 0.45, 0.40, 0.35, 0.30, 0.25, 0.20, 0.15, 0.10, 0.05, 0.00

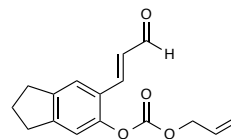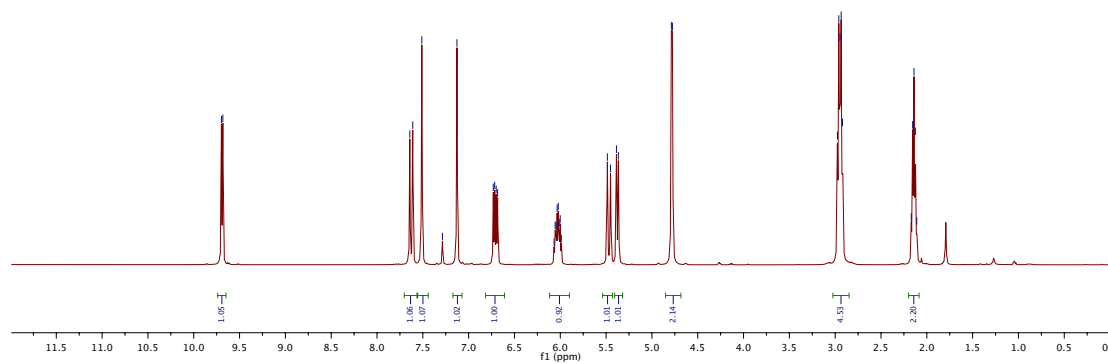 $^{13}\text{C}$  NMR Spectra of **1f** (126 MHz,  $\text{CDCl}_3$ ):klu7-24  
NU\_C13\_5mg CDCl3 (E:\A-500\Scheidt) kls030 30

193.91, 153.33, 150.09, 148.17, 143.00, 130.88, 129.27, 128.23, 119.94, 118.50, 77.38 CDCl3, 77.11 CDCl3, 76.85 CDCl3, 69.57, 33.27, 32.23, 25.64

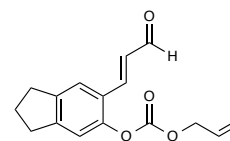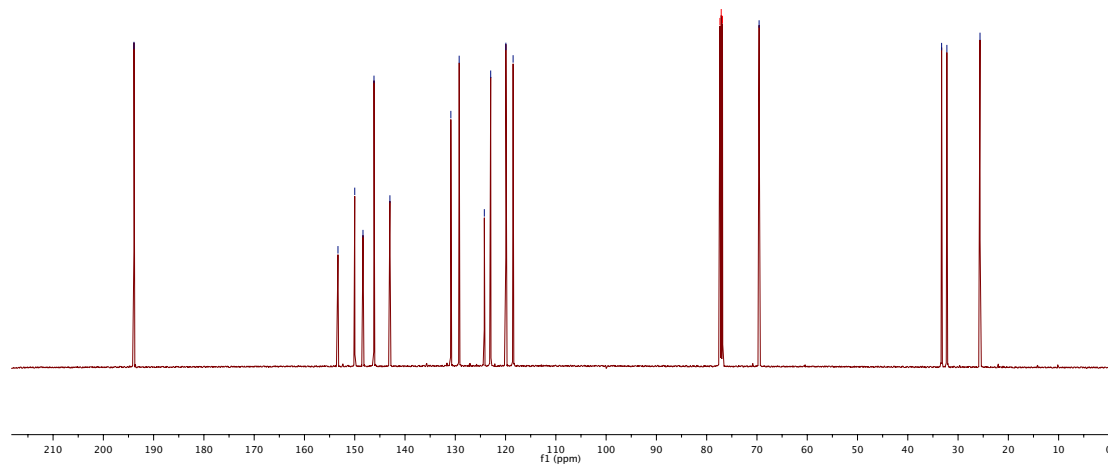



<sup>1</sup>H NMR Spectra of **1g** (500 MHz, CDCl<sub>3</sub>):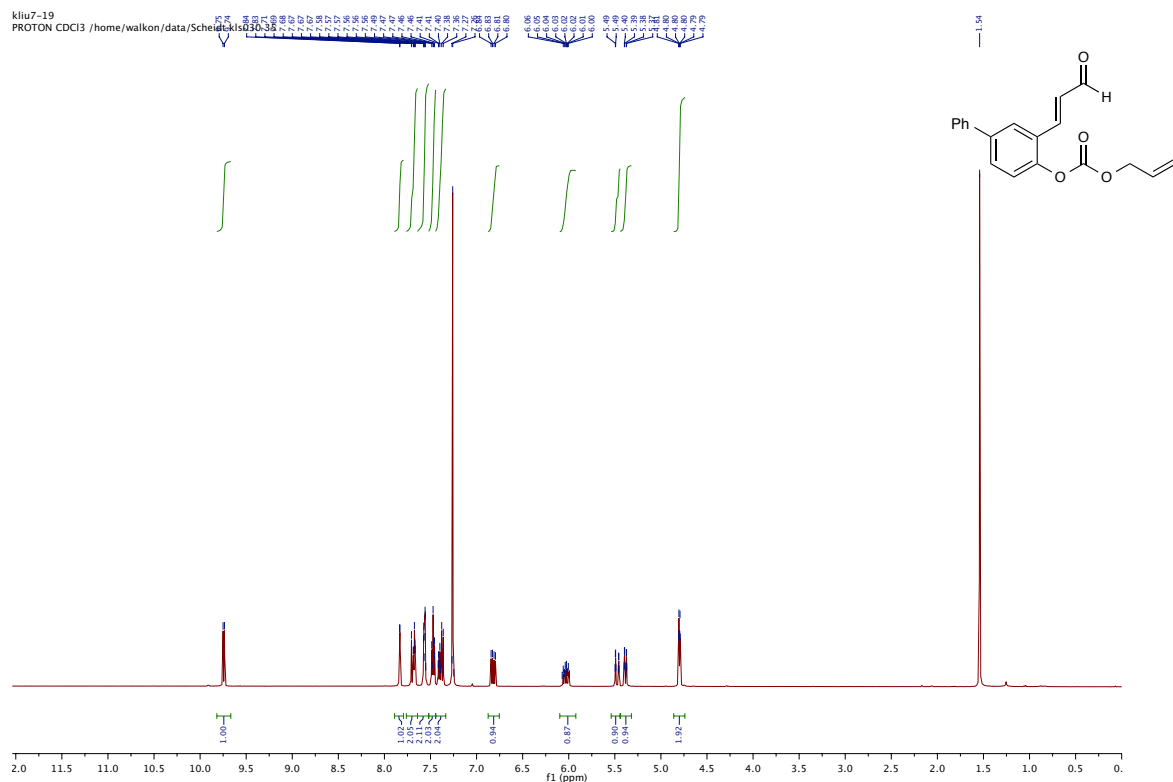<sup>13</sup>C NMR Spectra of **1g** (126 MHz, CDCl<sub>3</sub>):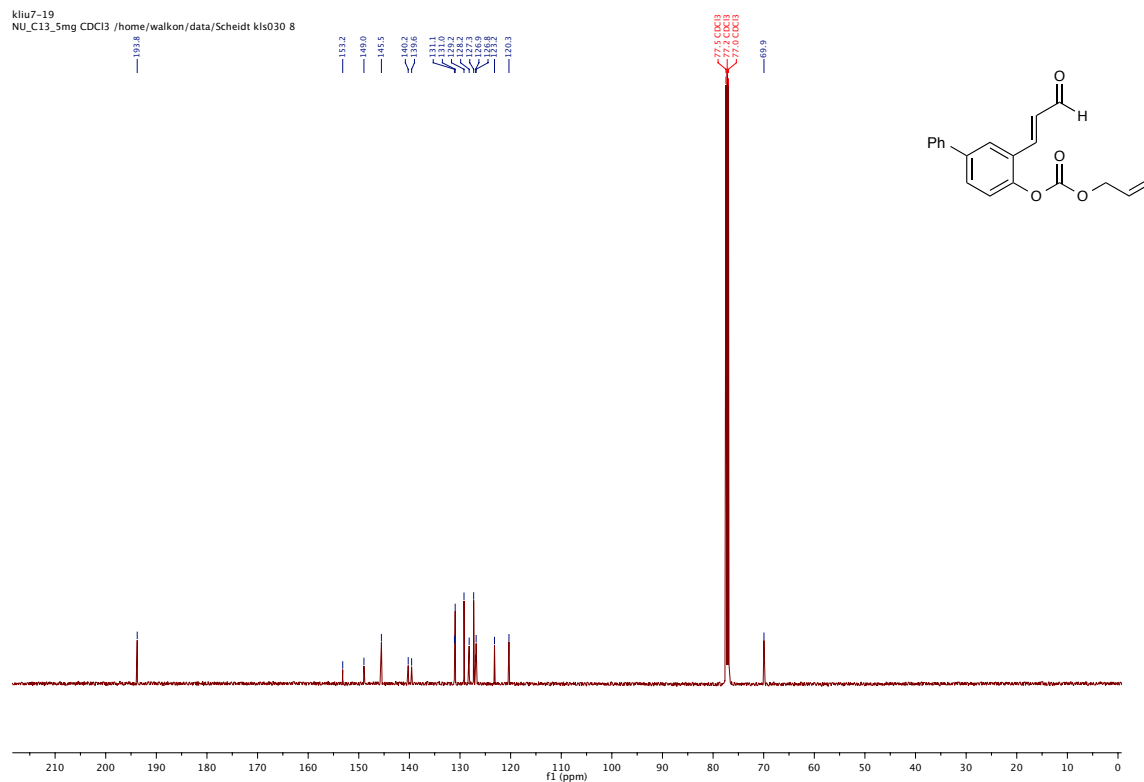

$^1\text{H}$  NMR Spectra of **1h** (500 MHz,  $\text{CDCl}_3$ ):kliu9-51  
PROTON CDCl3 /home/walkon/data/Scheidt/kl030 1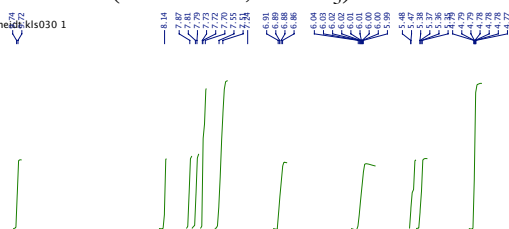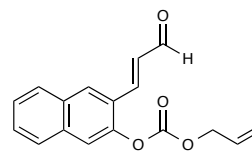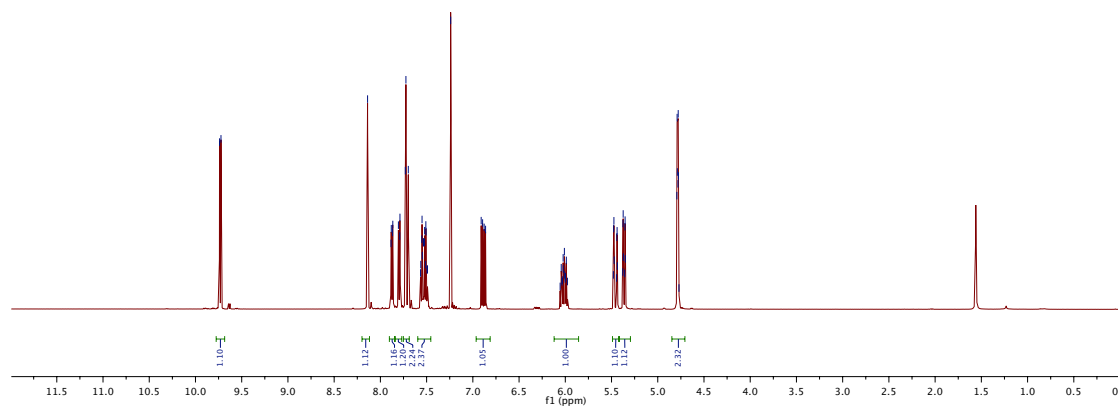 $^{13}\text{C}$  NMR Spectra of **1g** (126 MHz,  $\text{CDCl}_3$ ):kliu9-51  
NU\_C13\_5mg CDCl3 /home/walkon/data/Scheidt/kl030 1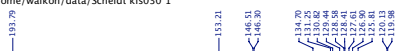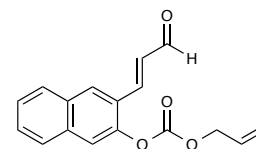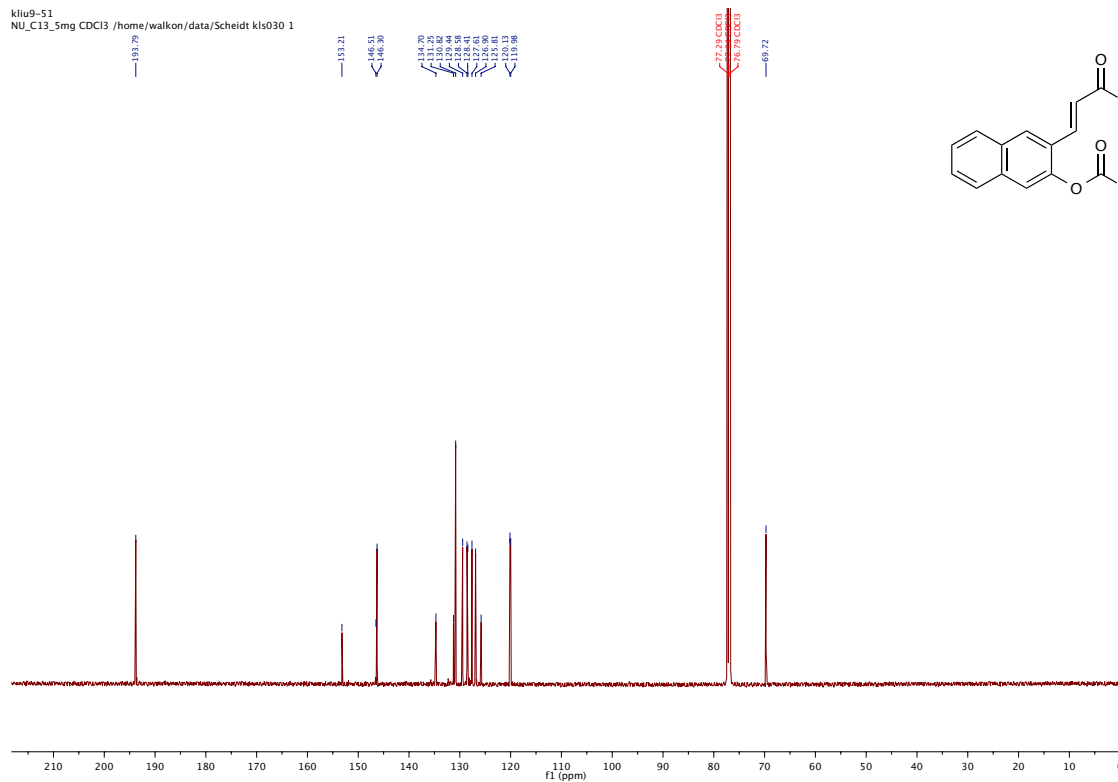

$^1\text{H}$  NMR Spectra of **1i** (500 MHz,  $\text{CDCl}_3$ ):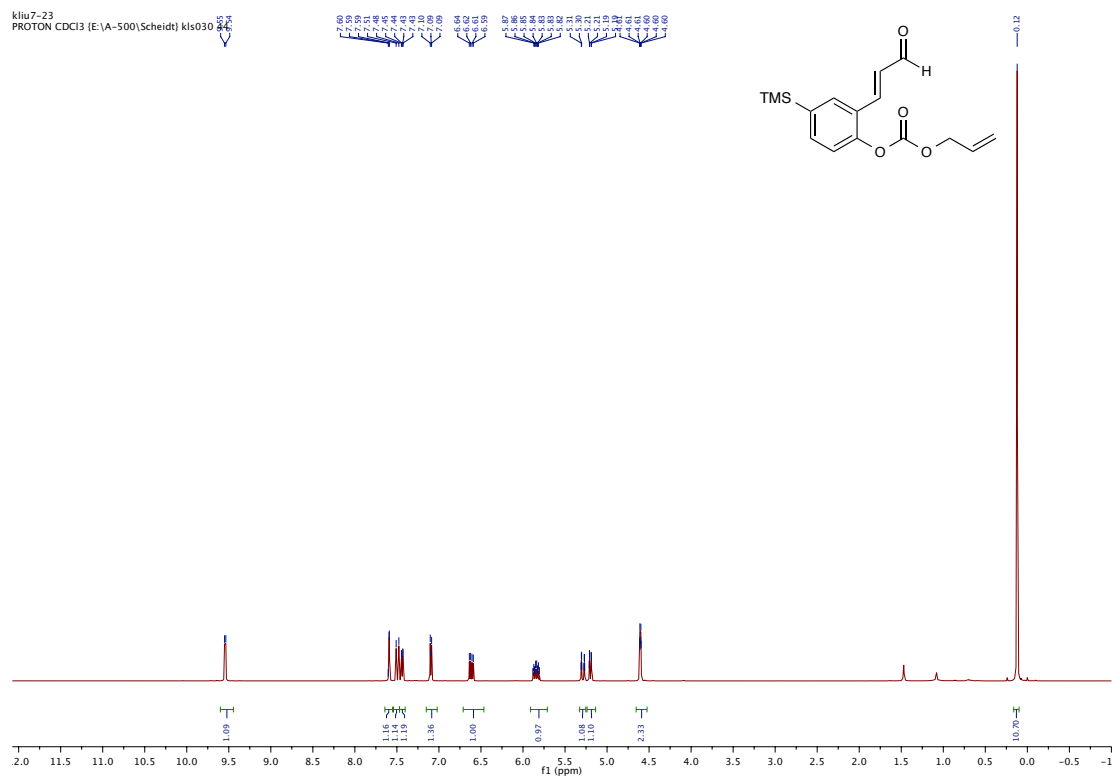 $^{13}\text{C}$  NMR Spectra of **1i** (126 MHz,  $\text{CDCl}_3$ ):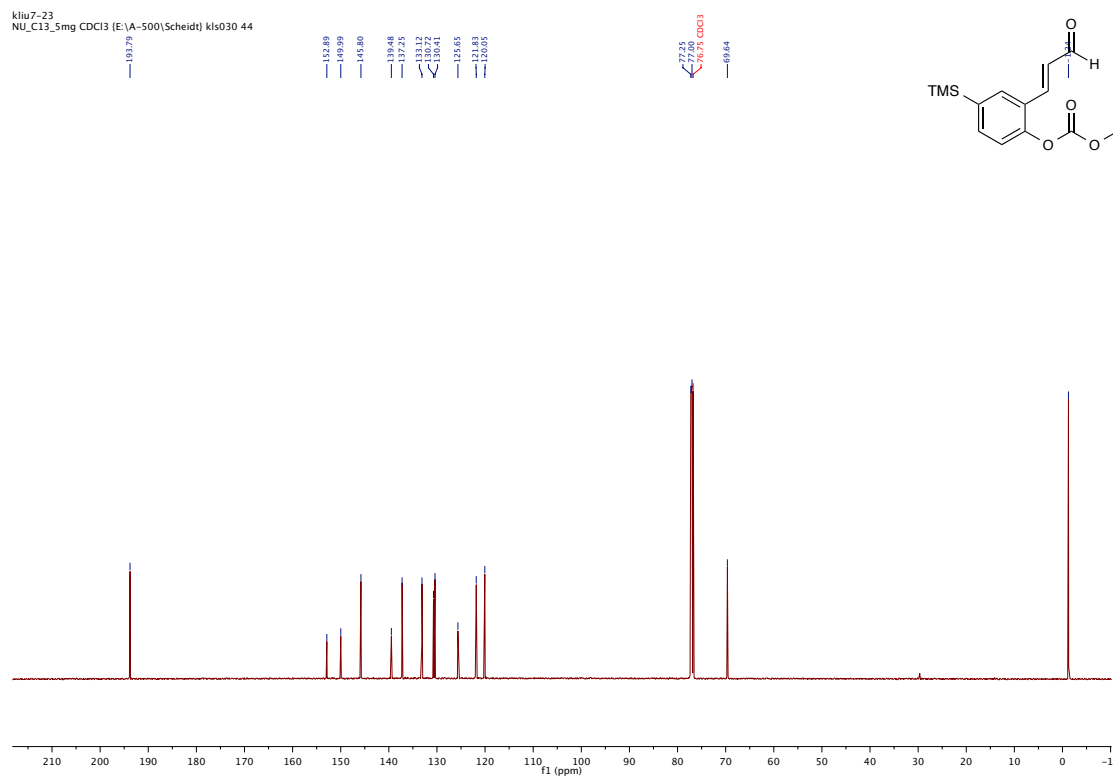

<sup>1</sup>H NMR Spectra of **1j** (500 MHz, CDCl<sub>3</sub>):klu3-96  
PROTON CDCl3 (E:\A-500\Scheidt) kls030 18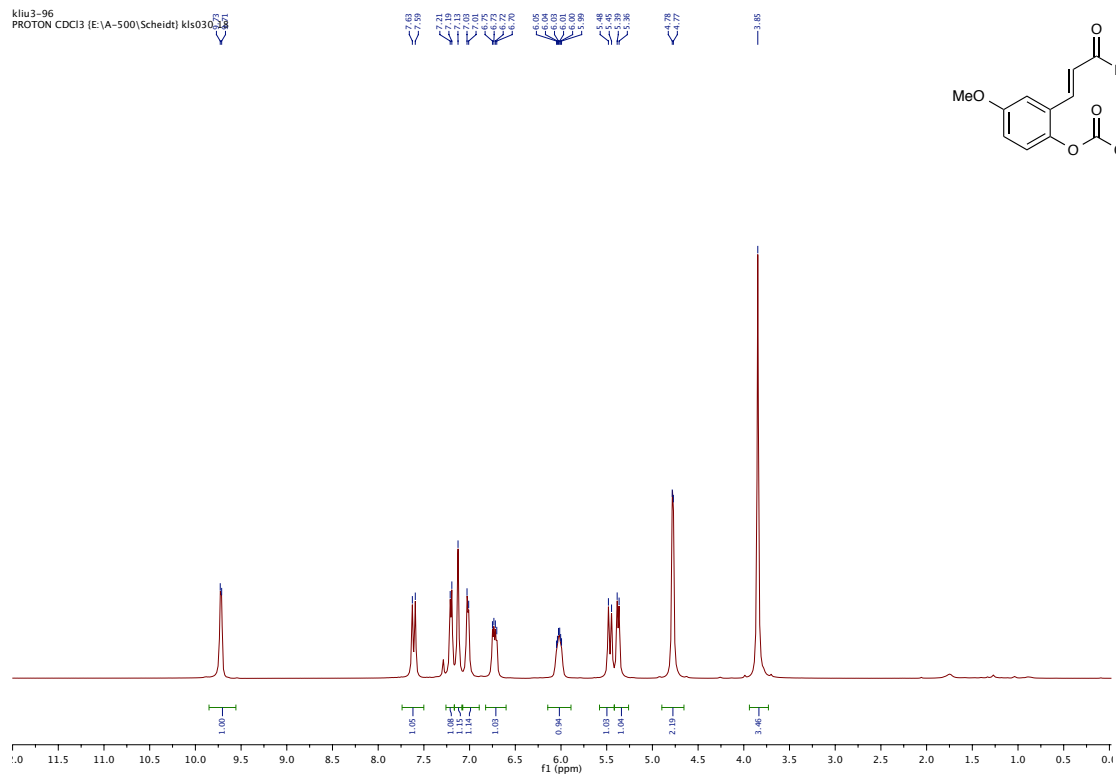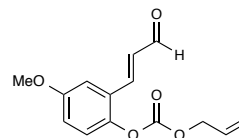<sup>13</sup>C NMR Spectra of **1j** (126 MHz, CDCl<sub>3</sub>):klu3-96  
NU\_C13\_5mg CDCl3 (E:\A-500\Scheidt) kls030 18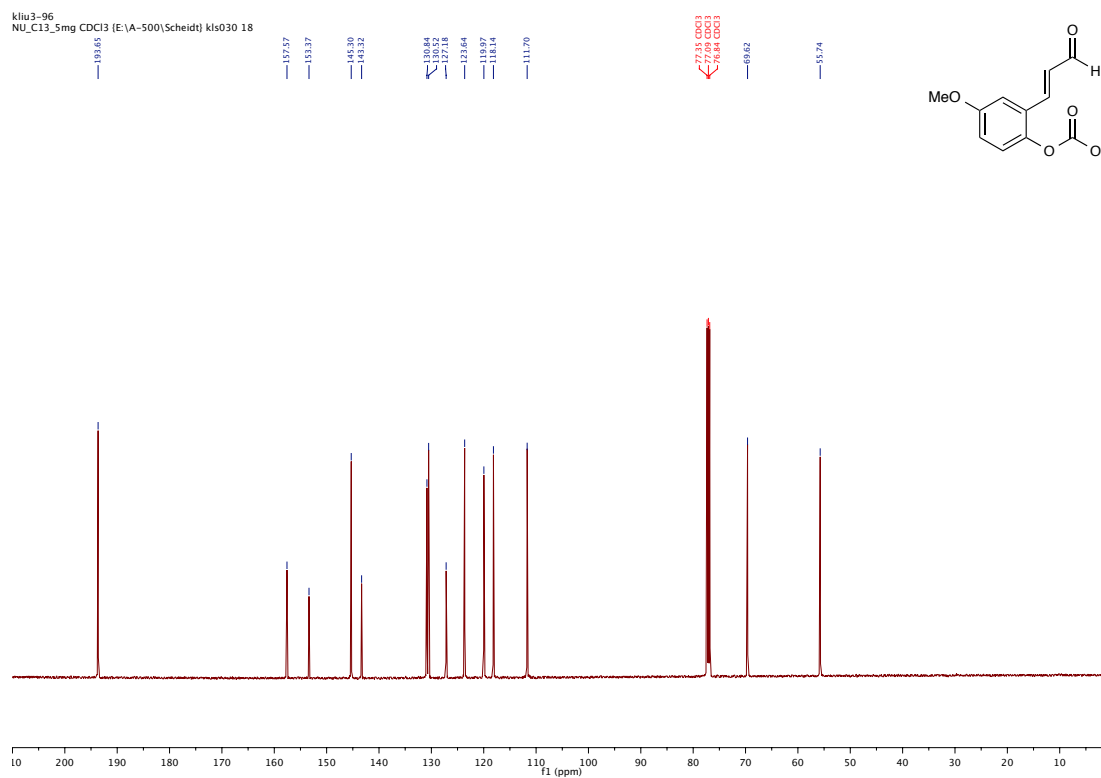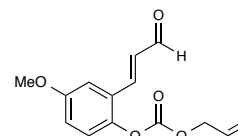



$^1\text{H}$  NMR Spectra of **11** (500 MHz,  $\text{CDCl}_3$ ):klu7-22  
PROTON  $\text{CDCl}_3$  (E:\A-500\Scheidt) kls030 38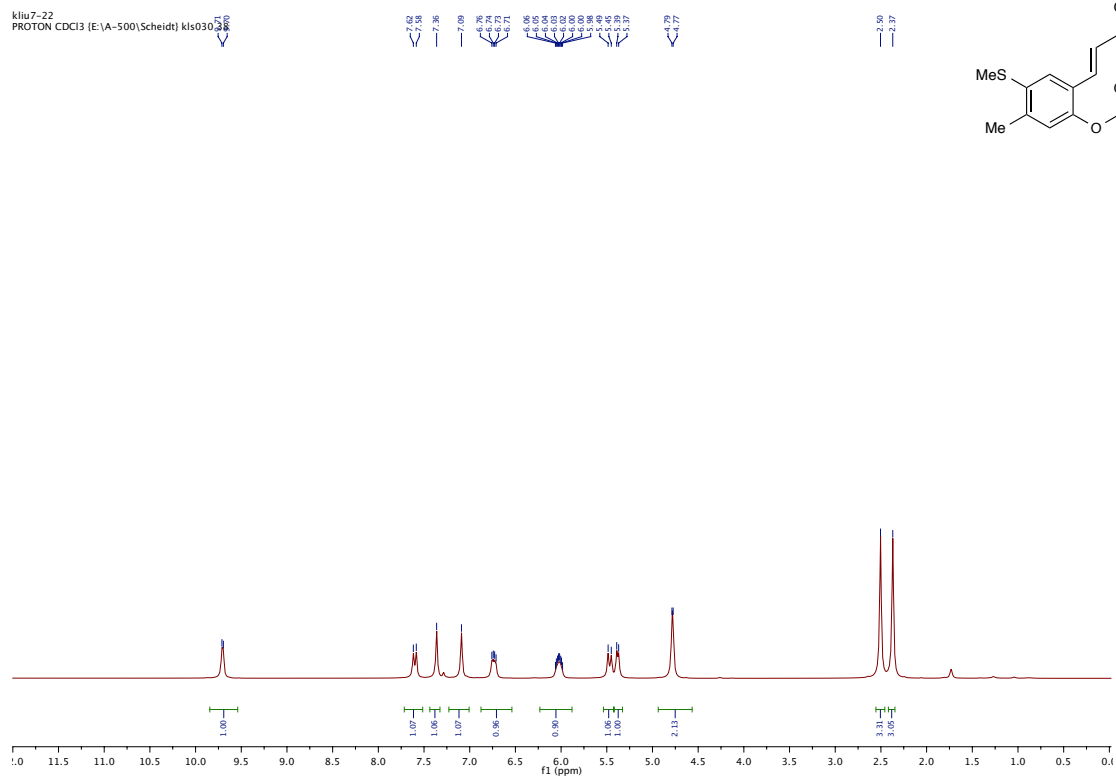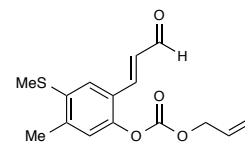 $^{13}\text{C}$  NMR Spectra of **11** (126 MHz,  $\text{CDCl}_3$ ):klu7-22  
NU\_C13\_10mg  $\text{CDCl}_3$  (E:\A-500\Scheidt) kls030 38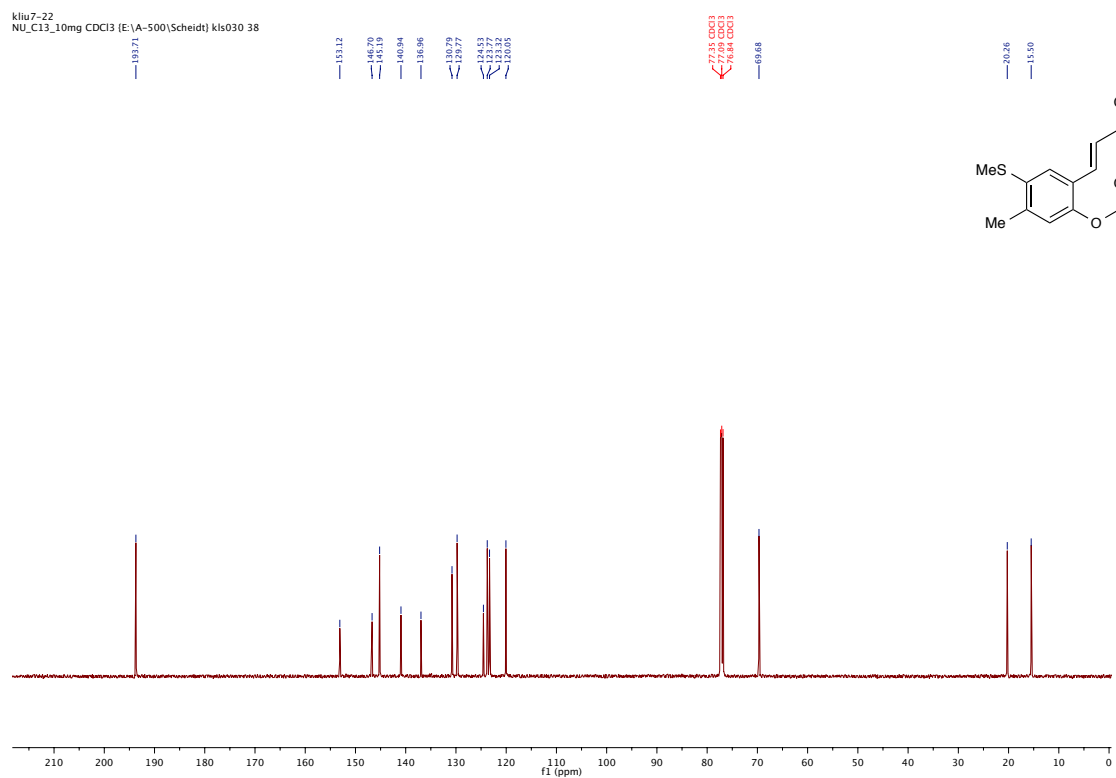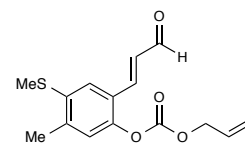

**<sup>1</sup>H NMR Spectra of 1m (500 MHz, CDCl<sub>3</sub>):**

klu6-59  
 PROTON CDCl3 (E:\A-500\Scheidt) kls030 53

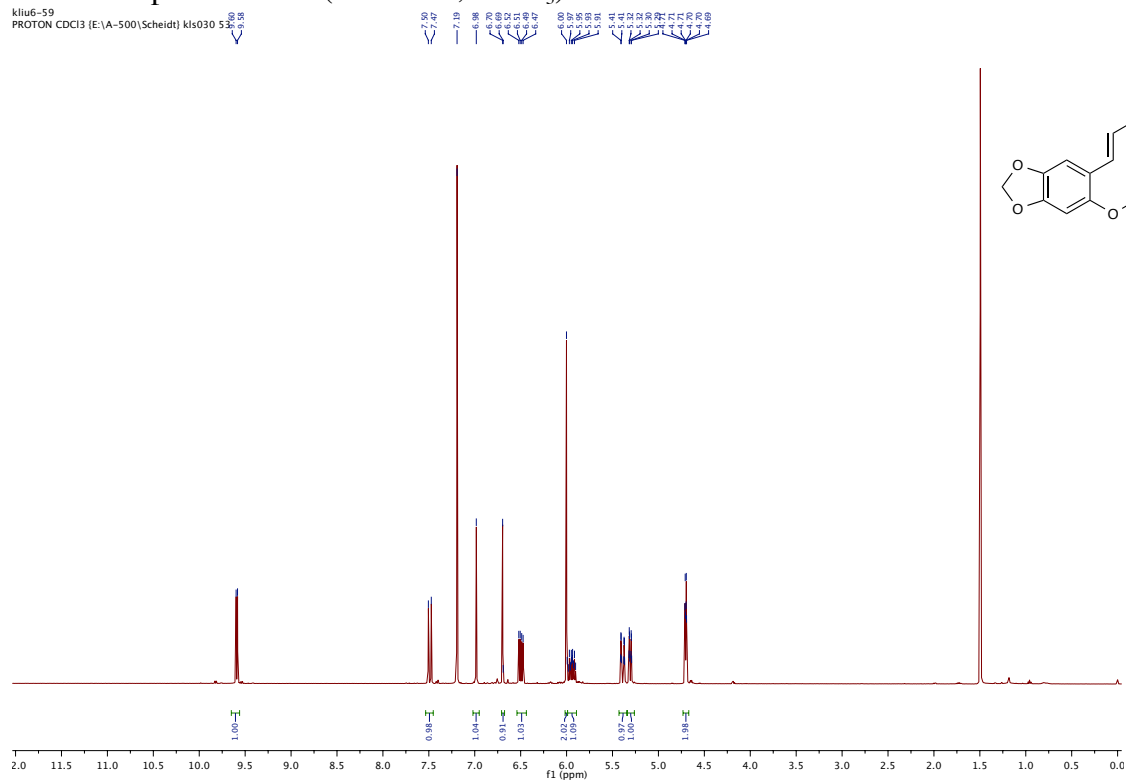**<sup>13</sup>C NMR Spectra of 1m (126 MHz, CDCl<sub>3</sub>):**

klu6-59  
 NU\_C13\_2mg CDCl3 (E:\A-500\Scheidt) kls030 53

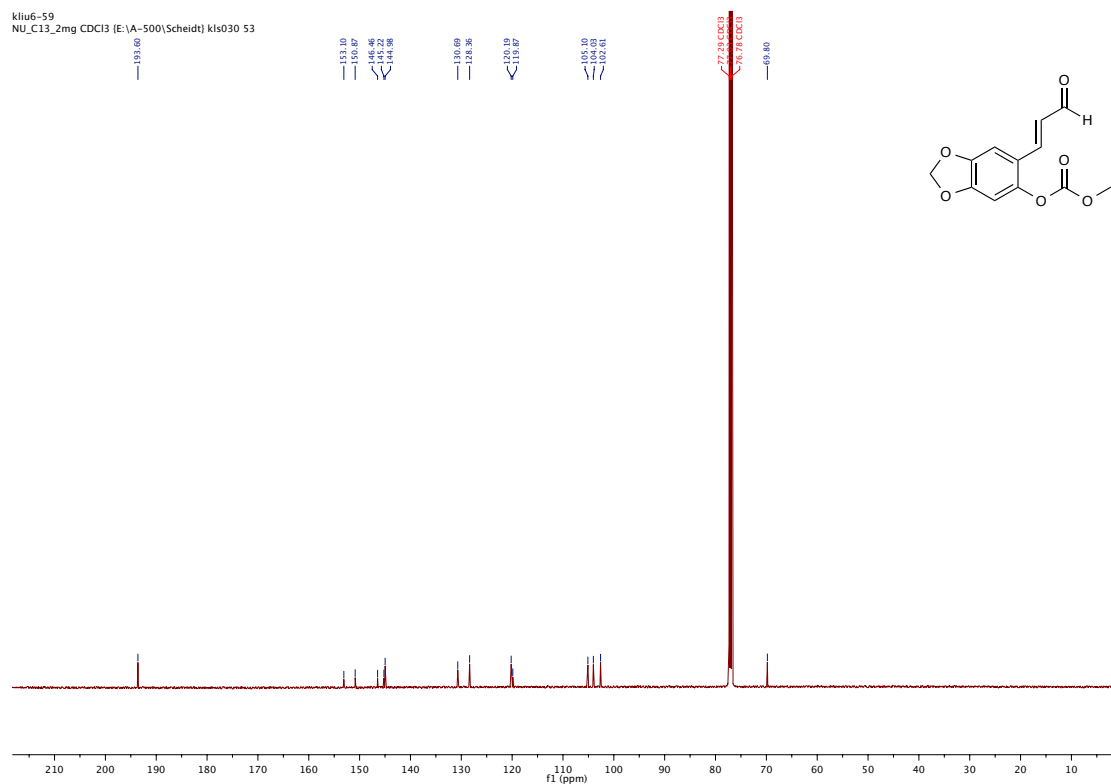

<sup>1</sup>H NMR Spectra of **1n** (500 MHz, CDCl<sub>3</sub>):klu3-98  
PROTON CDCl3 [E:\A-500\Scheidt] kls03030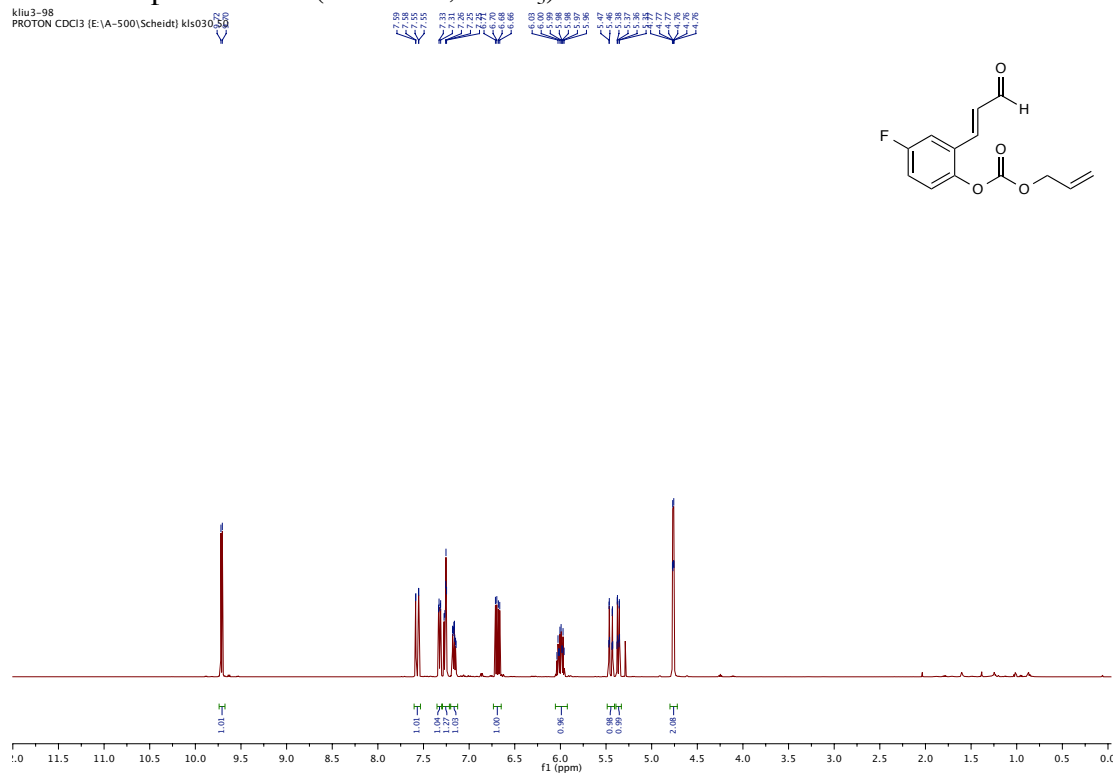<sup>13</sup>C NMR Spectra of **1n** (126 MHz, CDCl<sub>3</sub>):klu3-98  
NU\_C13\_1mg CDCl3 [E:\A-500\Scheidt] kls03030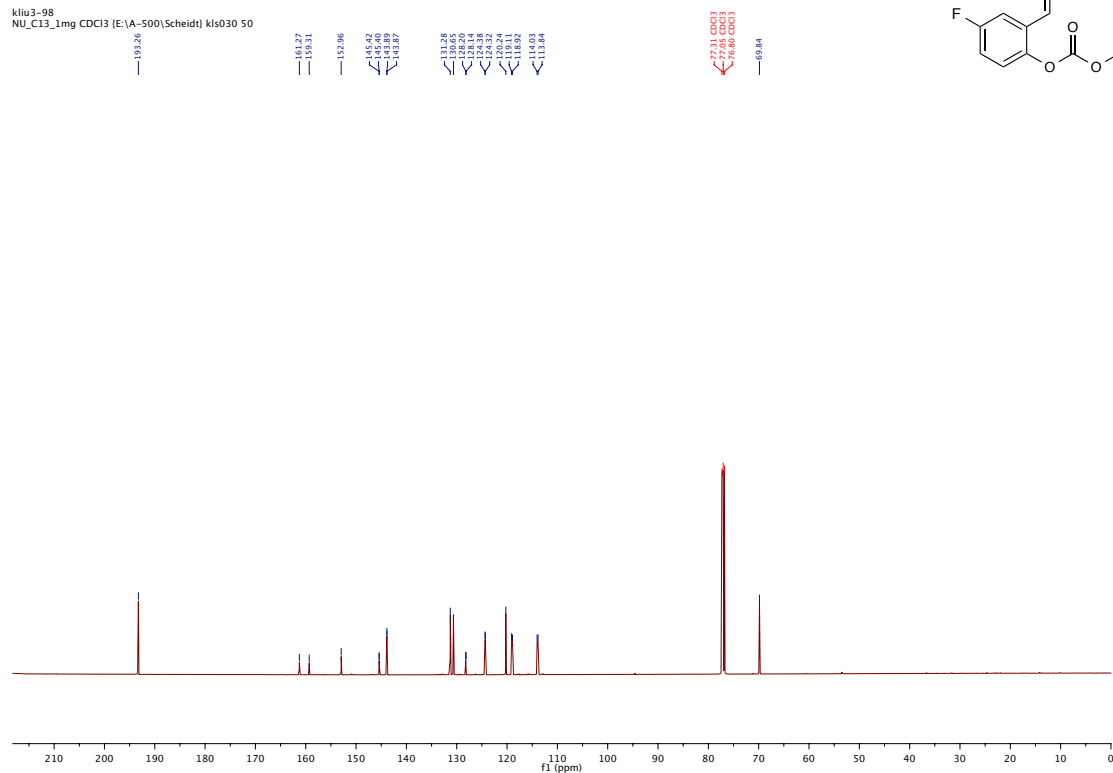



$^1\text{H}$  NMR Spectra of **1o** (500 MHz,  $\text{CDCl}_3$ ):klu3-59  
PROTON CDCl3 [E:\A-500\Scheidt] kls030 38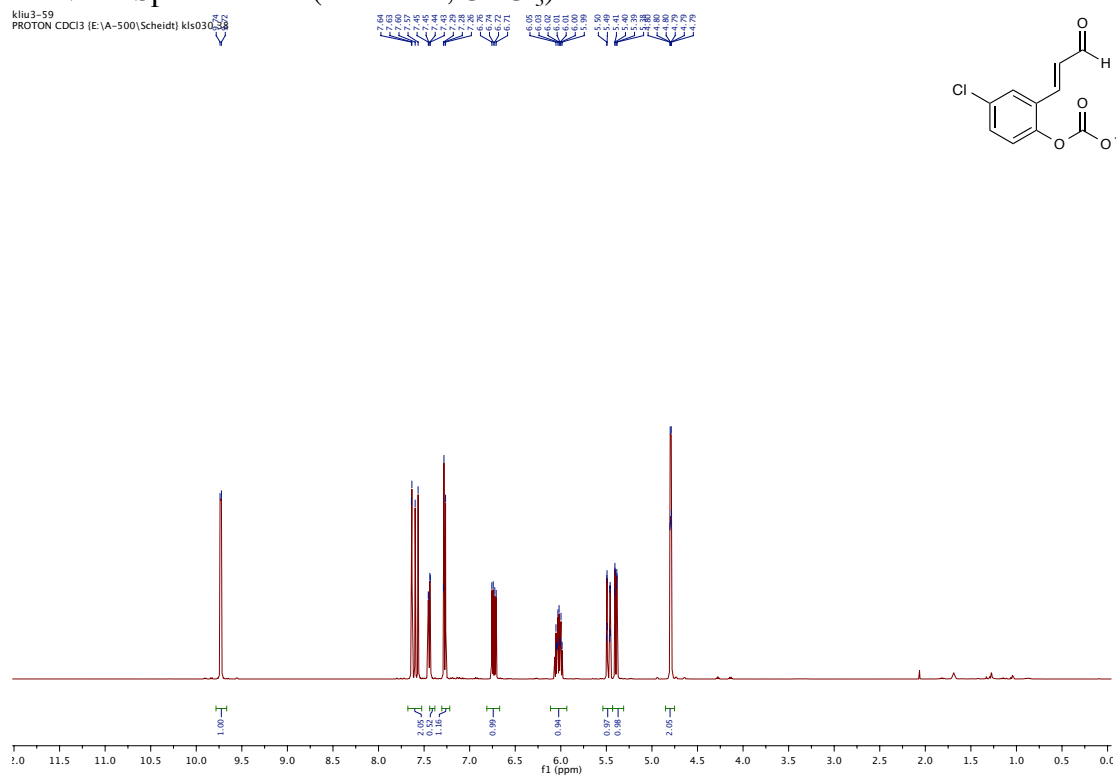 $^{13}\text{C}$  NMR Spectra of **1o** (126 MHz,  $\text{CDCl}_3$ ):klu3-59  
NU\_C13\_5mg CDCl3 [E:\A-500\Scheidt] kls030 38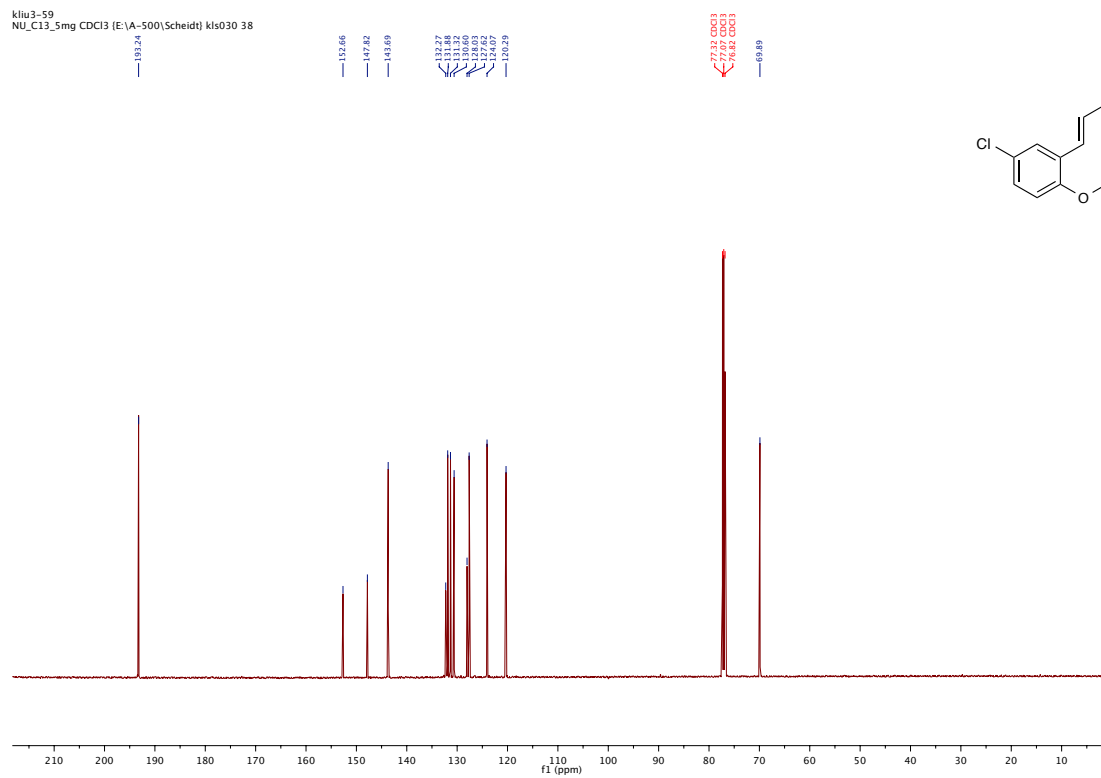

<sup>1</sup>H NMR Spectra of **8** (500 MHz, CDCl<sub>3</sub>):

kliu3-42  
 PROTON CDCl3 (E:1A-500)(Scheidt) kls0303

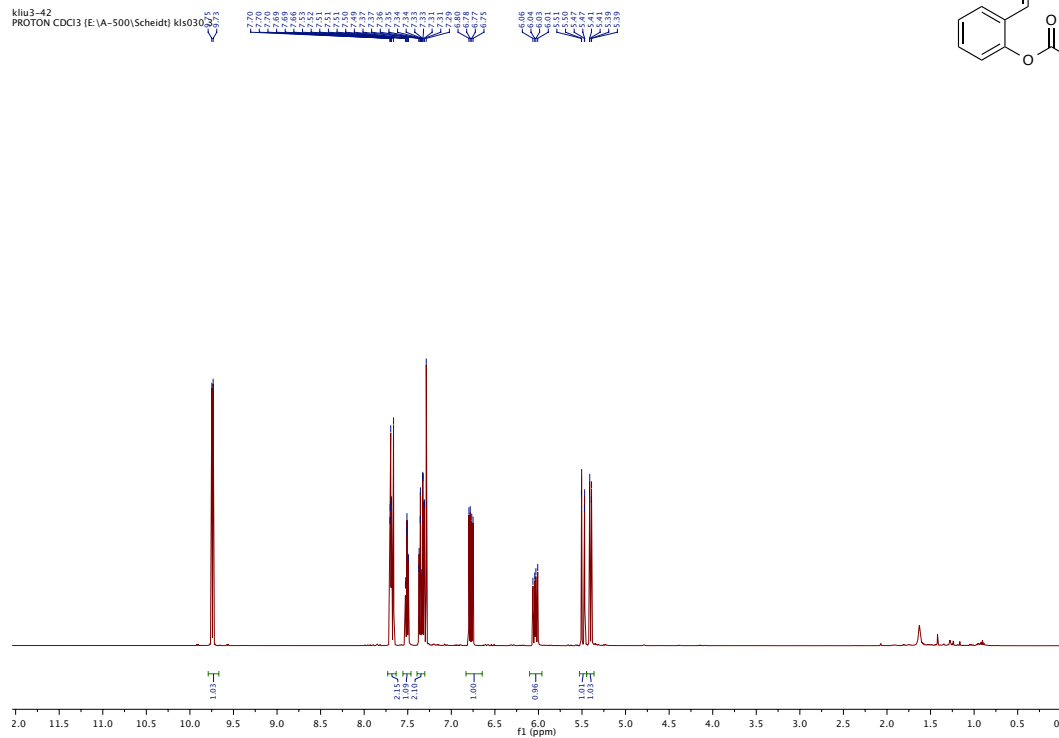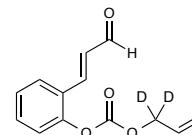<sup>13</sup>C NMR Spectra of **8** (126 MHz, CDCl<sub>3</sub>):

kliu3-42  
 NU\_C13\_2mg CDCl3 (E:1A-500)(Scheidt) kls0303

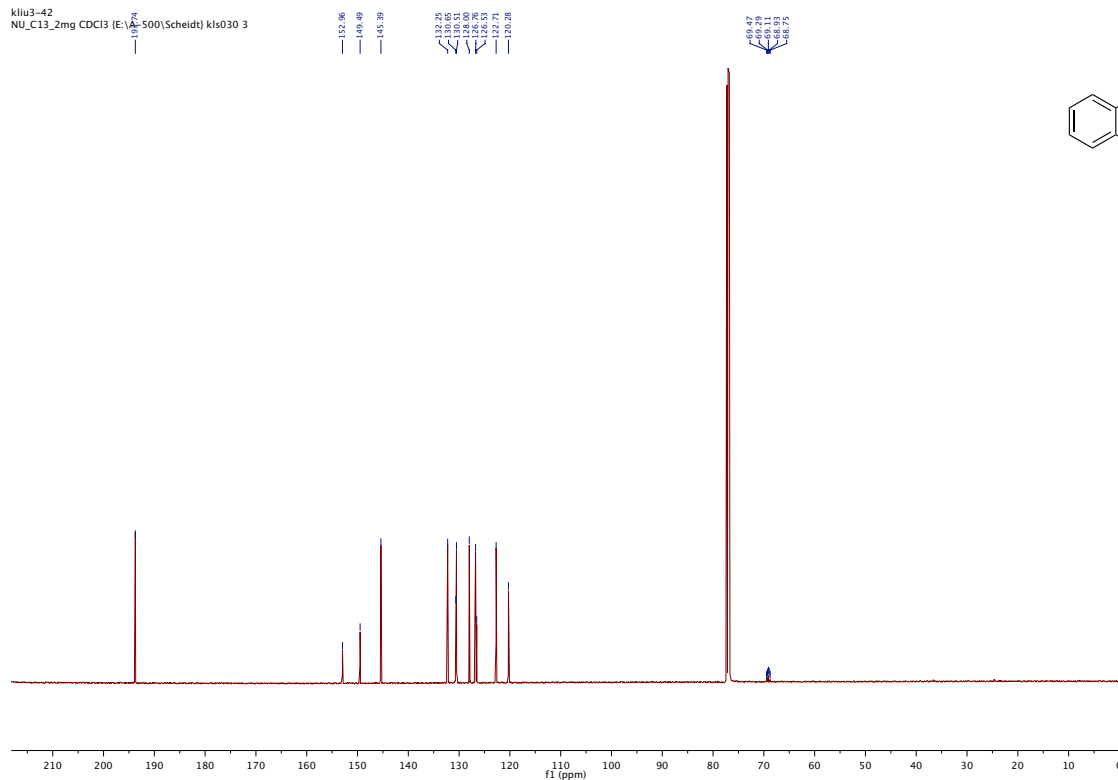



$^1\text{H}$  NMR Spectra of **14** (500 MHz,  $\text{CDCl}_3$ ):klu5-39  
PROTON CDCl3 (E:\A-500\Scheidt) kls030 12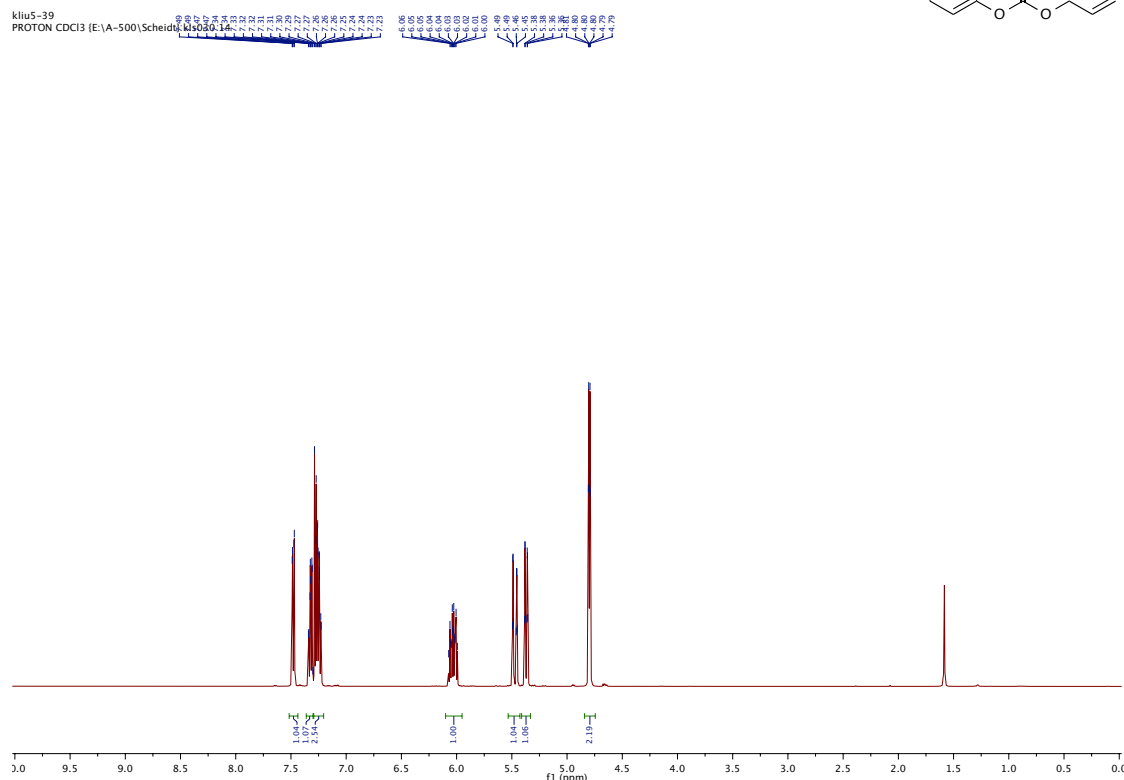 $^{13}\text{C}$  NMR Spectra of **14** (126 MHz,  $\text{CDCl}_3$ ):klu5-39  
NU\_C13\_5mg CDCl3 (E:\A-500\Scheidt) kls030 12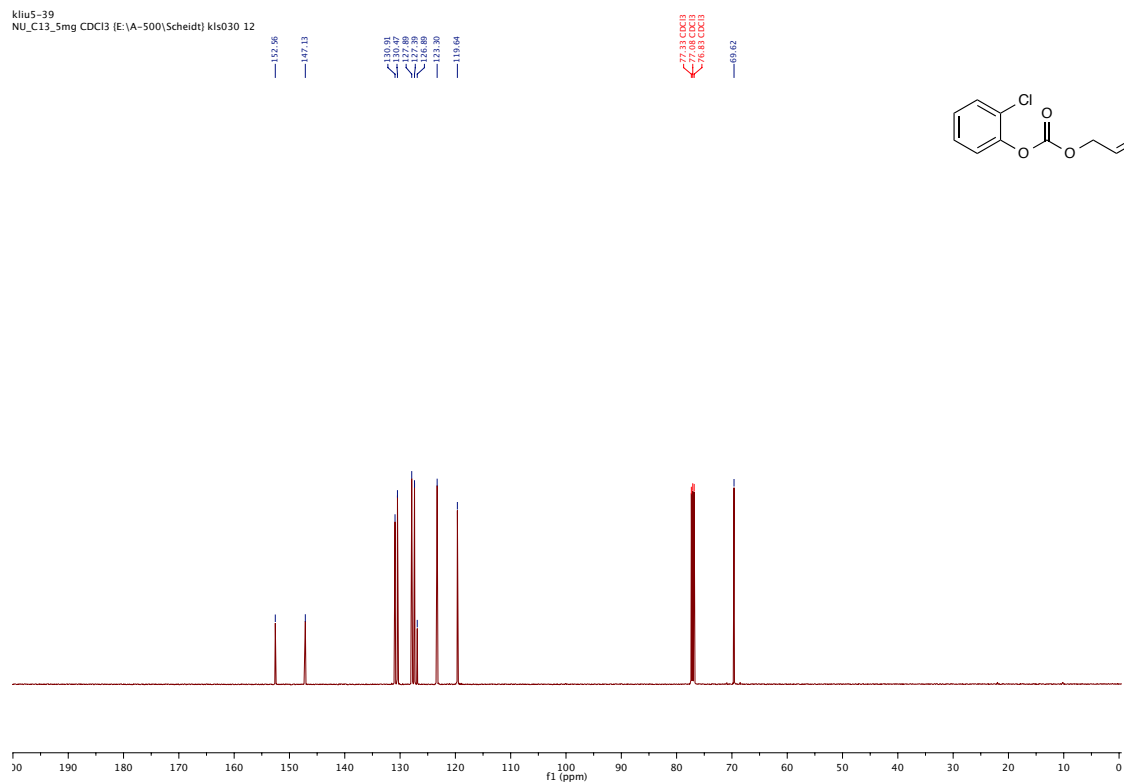

<sup>1</sup>H NMR Spectra of **6** (500 MHz, CDCl<sub>3</sub>):klu2-31  
PROTON CDCl3 (E:\A-500\Scheidt) kls030 14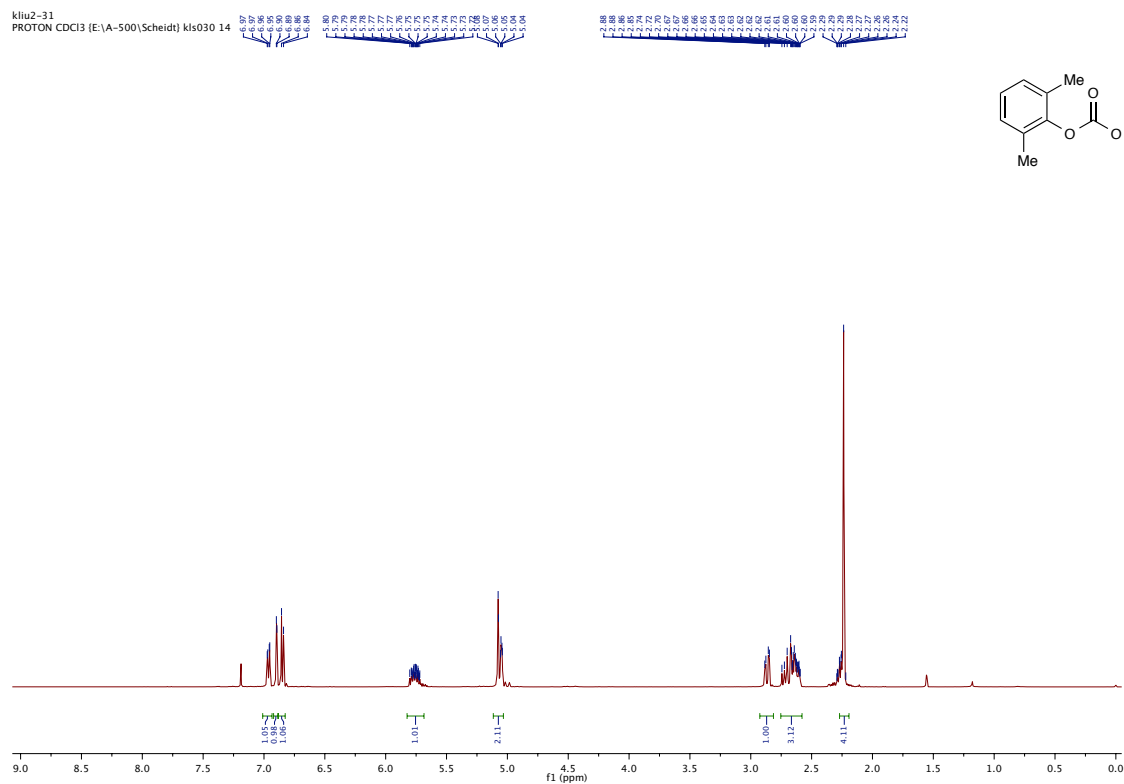<sup>13</sup>C NMR Spectra of **6** (126 MHz, CDCl<sub>3</sub>)klu1-83  
NU\_C13\_10mg CDCl3 (E:\A-500\Scheidt) kls030 8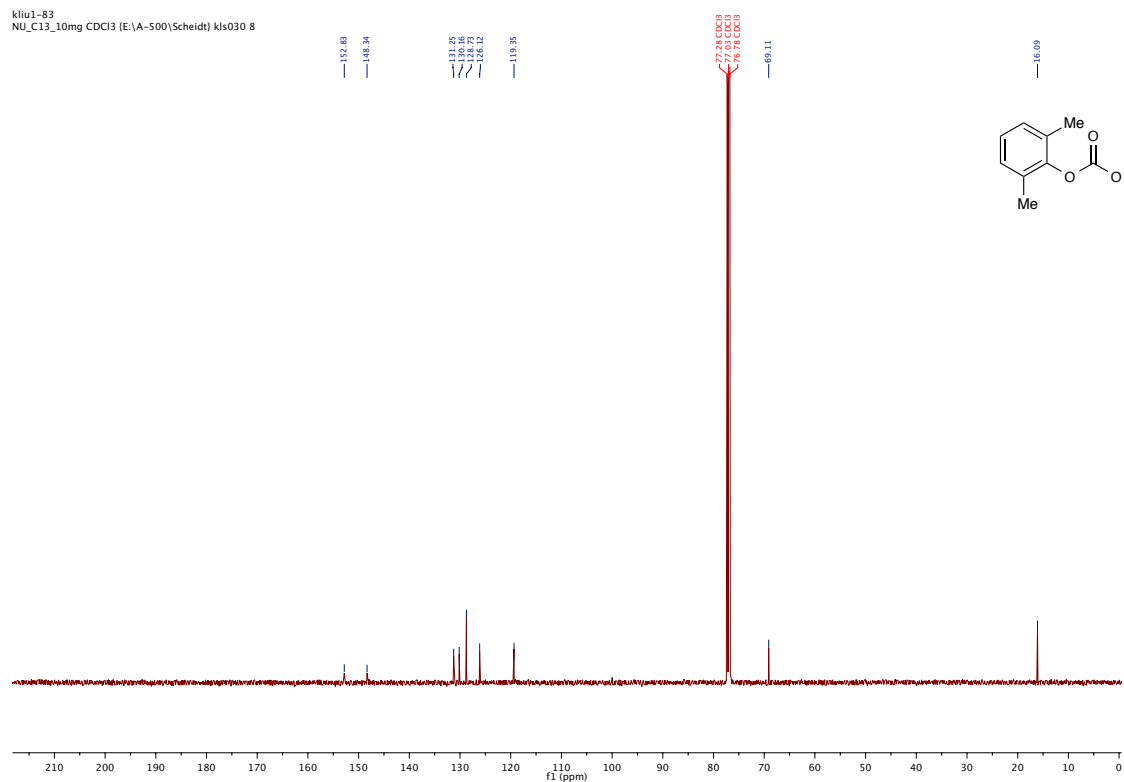

$^1\text{H}$  NMR Spectra of **2b** (500 MHz,  $\text{CDCl}_3$ ):klu2-31  
PROTON CDCl3 (E:\A-500\Scheidt) kls030 14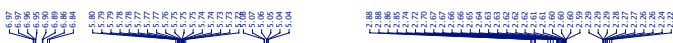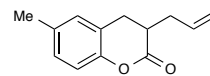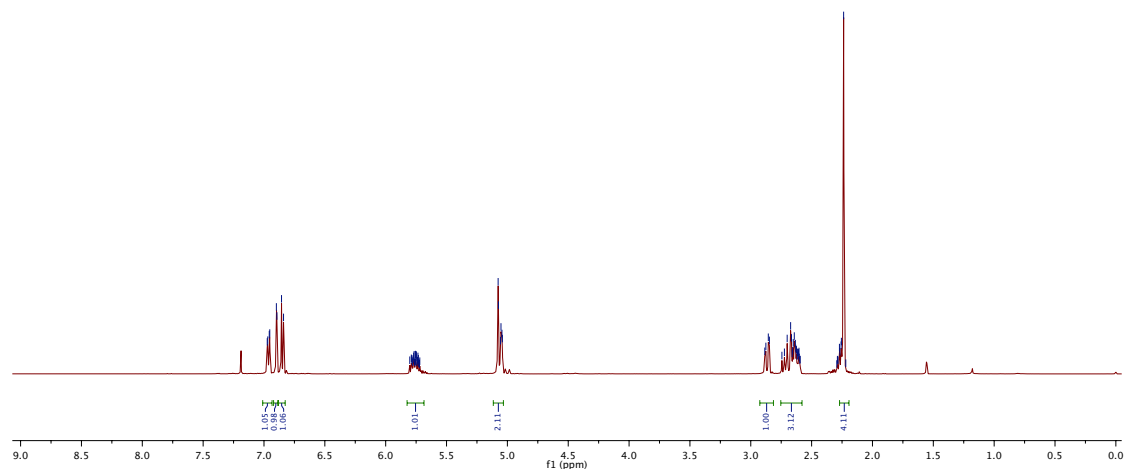 $^{13}\text{C}$  NMR Spectra of **2b** (126 MHz,  $\text{CDCl}_3$ ):klu2-31  
NU\_C13\_10mg CDCl3 (E:\A-500\Scheidt) kls030 14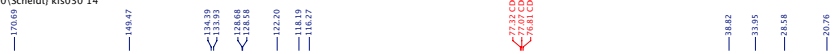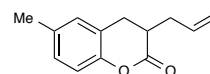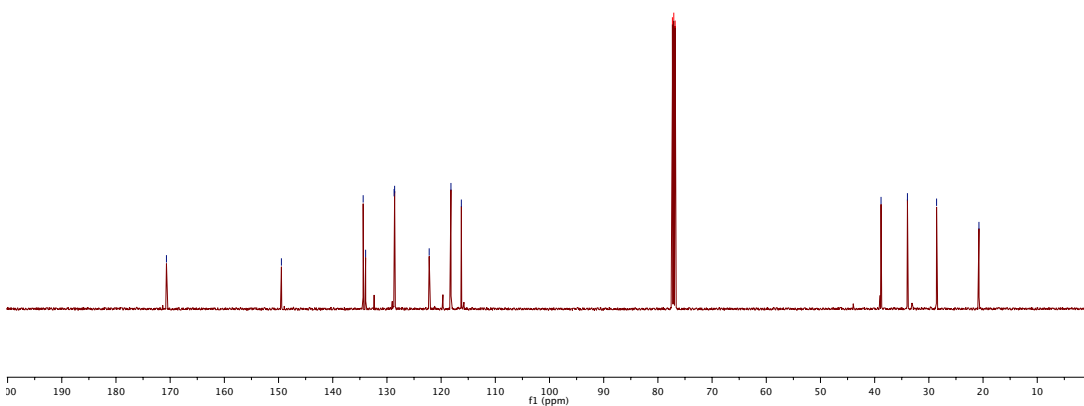

<sup>1</sup>H NMR Spectra of **2c** (500 MHz, CDCl<sub>3</sub>):

klu4-03  
 PROTON CDCl3 (E:\A-500\Scheidt) kls030 15

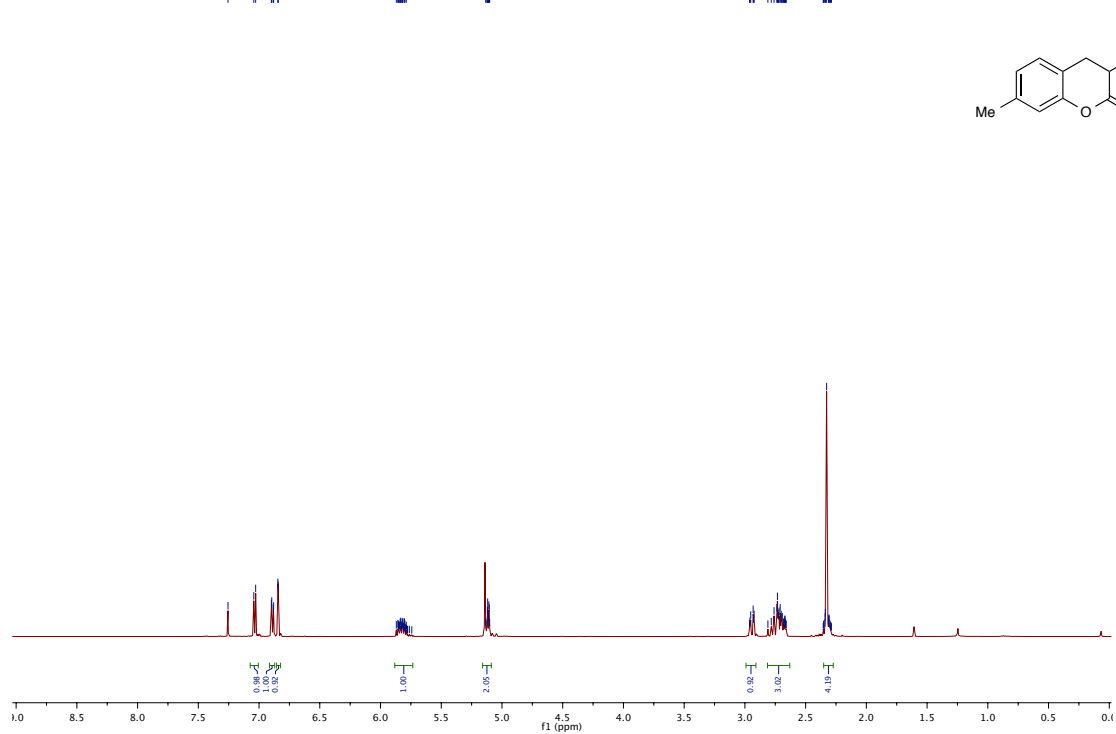<sup>13</sup>C NMR Spectra of **2c** (126 MHz, CDCl<sub>3</sub>):

klu4-03  
 NU\_C13\_5mg CDCl3 (E:\A-500\Scheidt) kls030 15

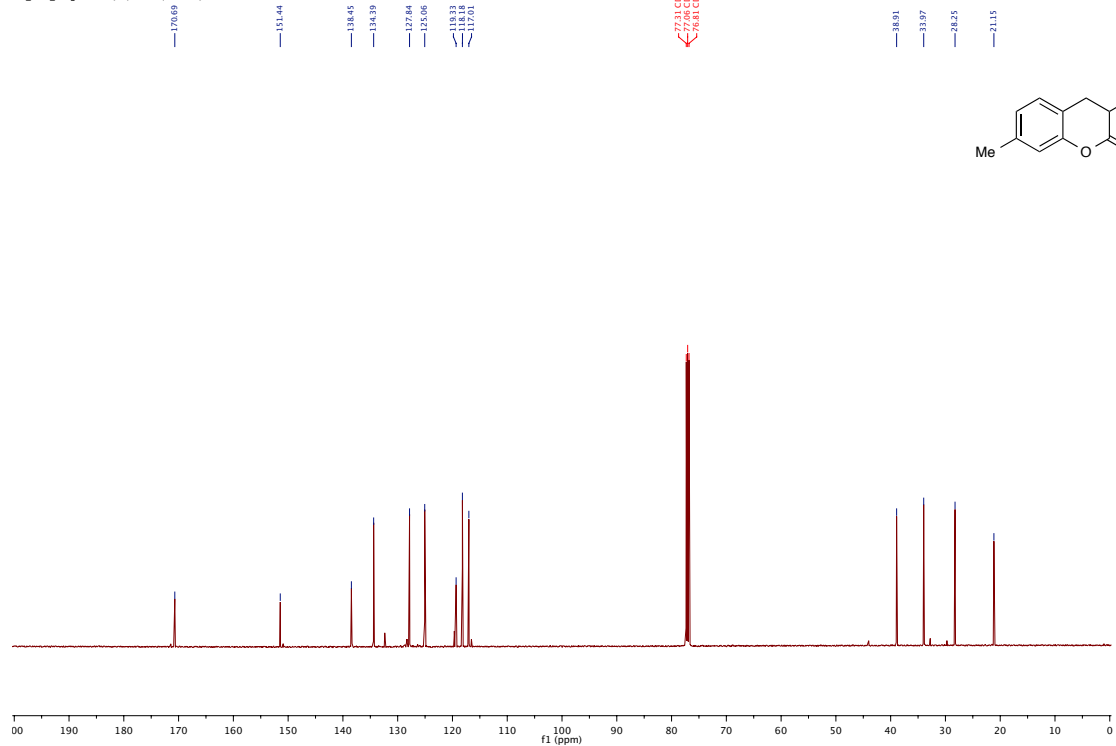

$^1\text{H}$  NMR Spectra of **2d** (500 MHz,  $\text{CDCl}_3$ ):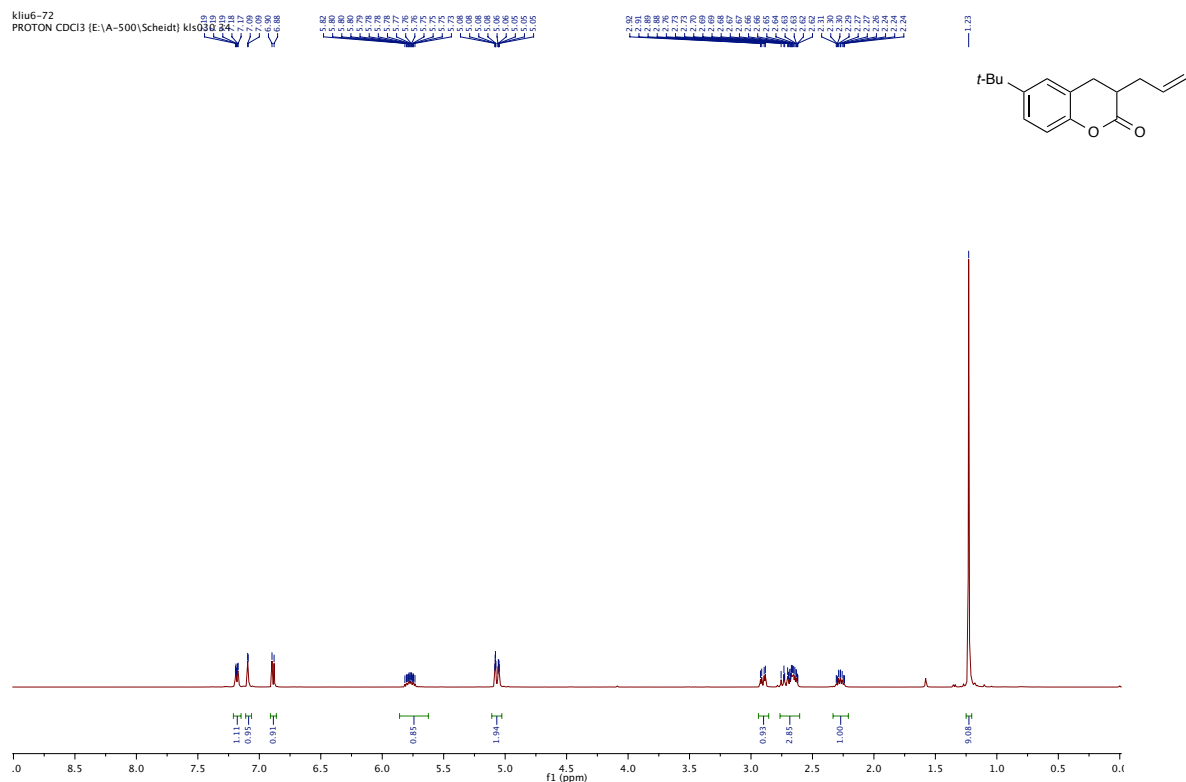 $^{13}\text{C}$  NMR Spectra of **2d** (126 MHz,  $\text{CDCl}_3$ ):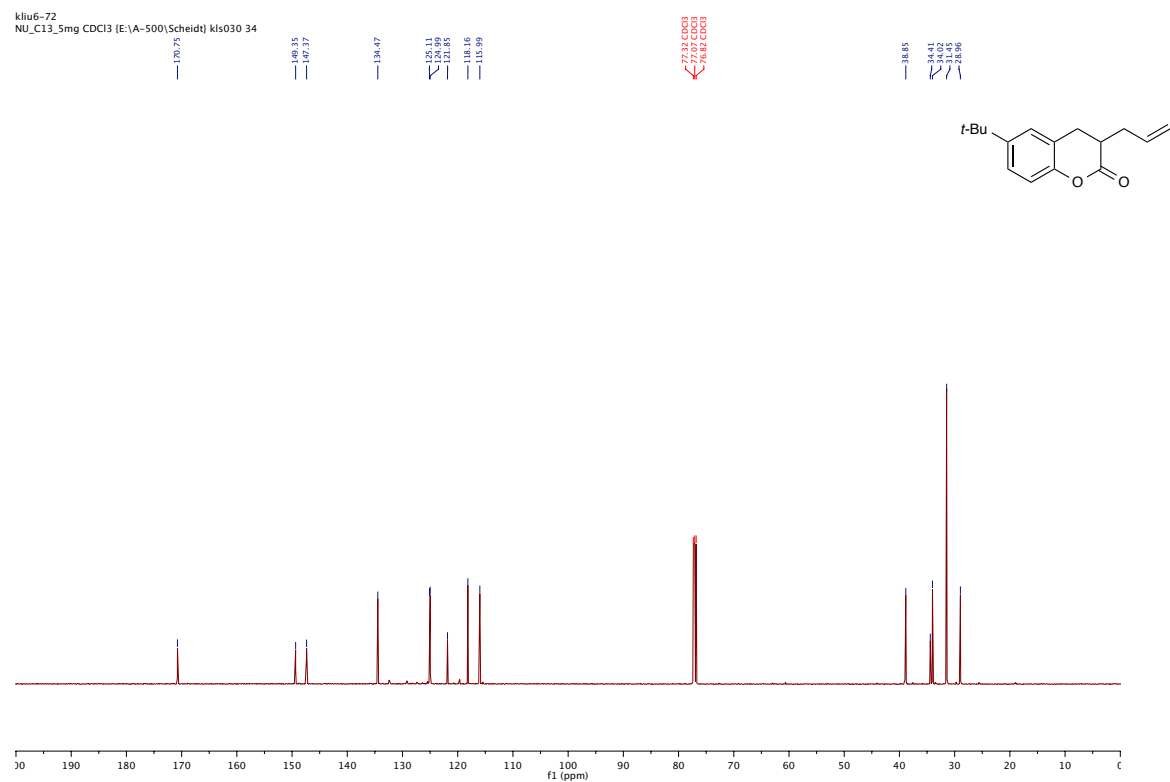



$^1\text{H}$  NMR Spectra of **2e** (500 MHz,  $\text{CDCl}_3$ ):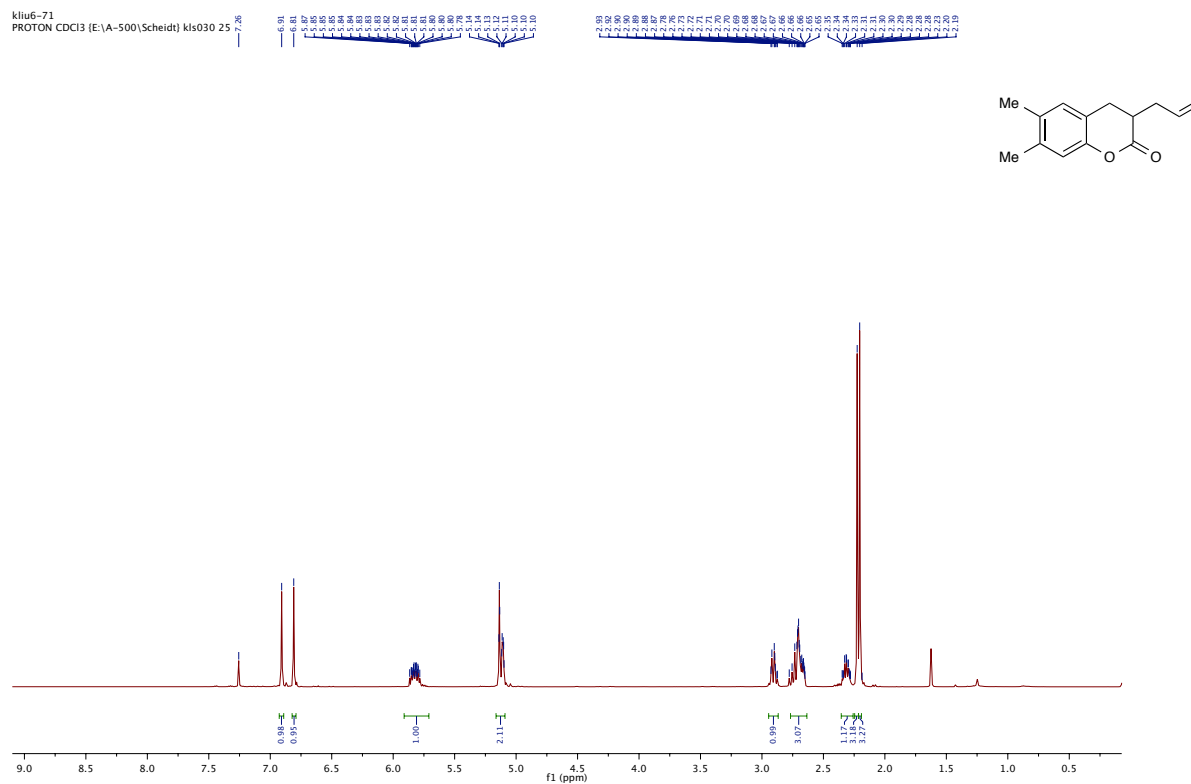 $^{13}\text{C}$  NMR Spectra of **2e** (126 MHz,  $\text{CDCl}_3$ ):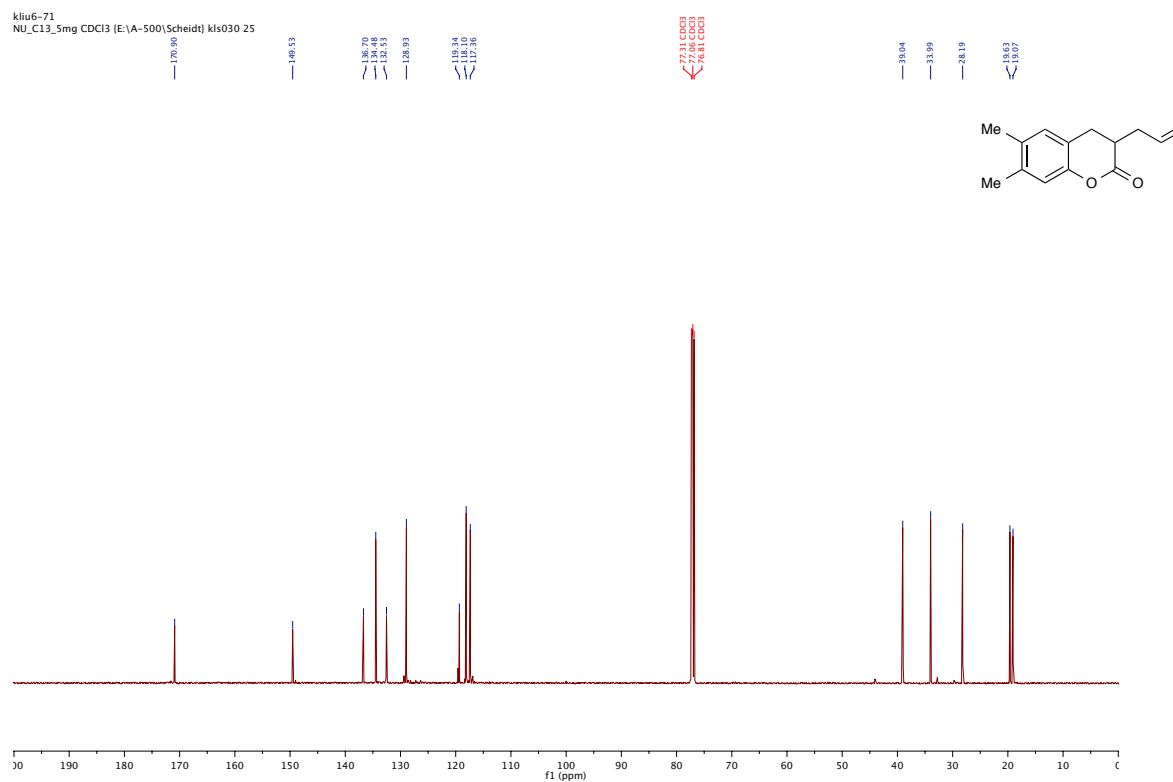

<sup>1</sup>H NMR Spectra of **2f** (500 MHz, CDCl<sub>3</sub>):

klu7-32  
 PROTON CDCl3 (E:\A-500\Scheidt) kls030 45

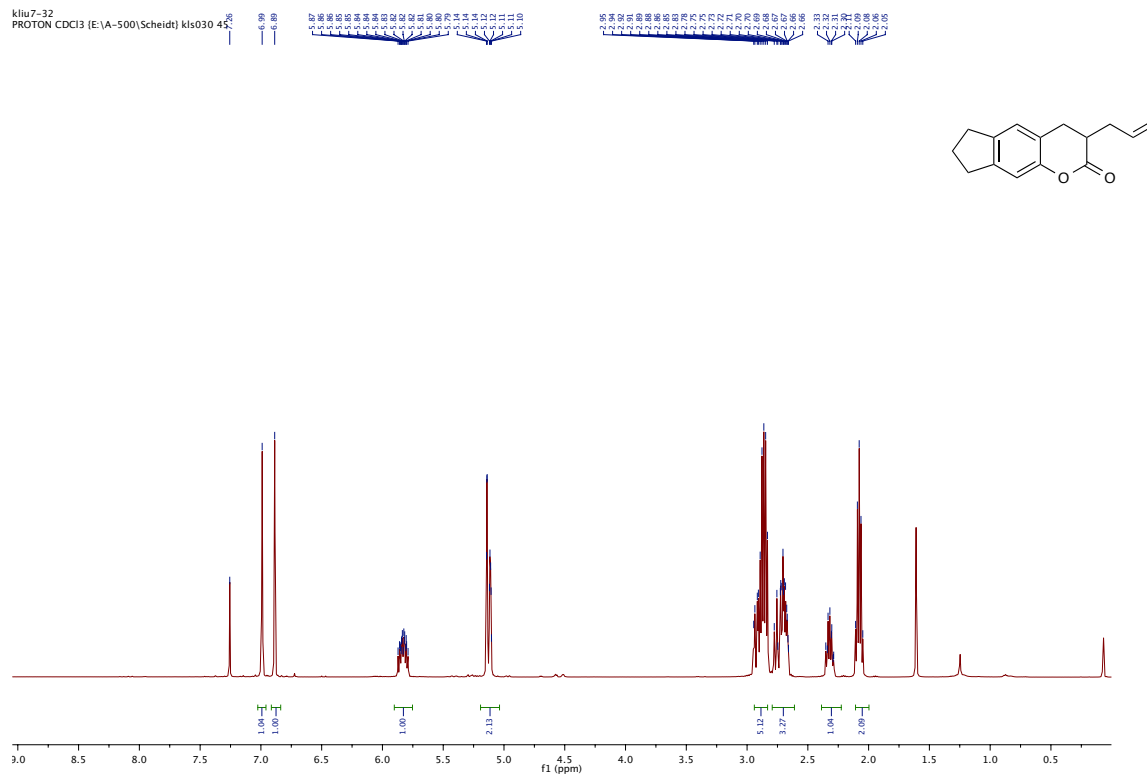<sup>13</sup>C NMR Spectra of **2f** (126 MHz, CDCl<sub>3</sub>):

klu7-32  
 NU\_C13\_5mg CDCl3 (E:\A-500\Scheidt) kls030 45

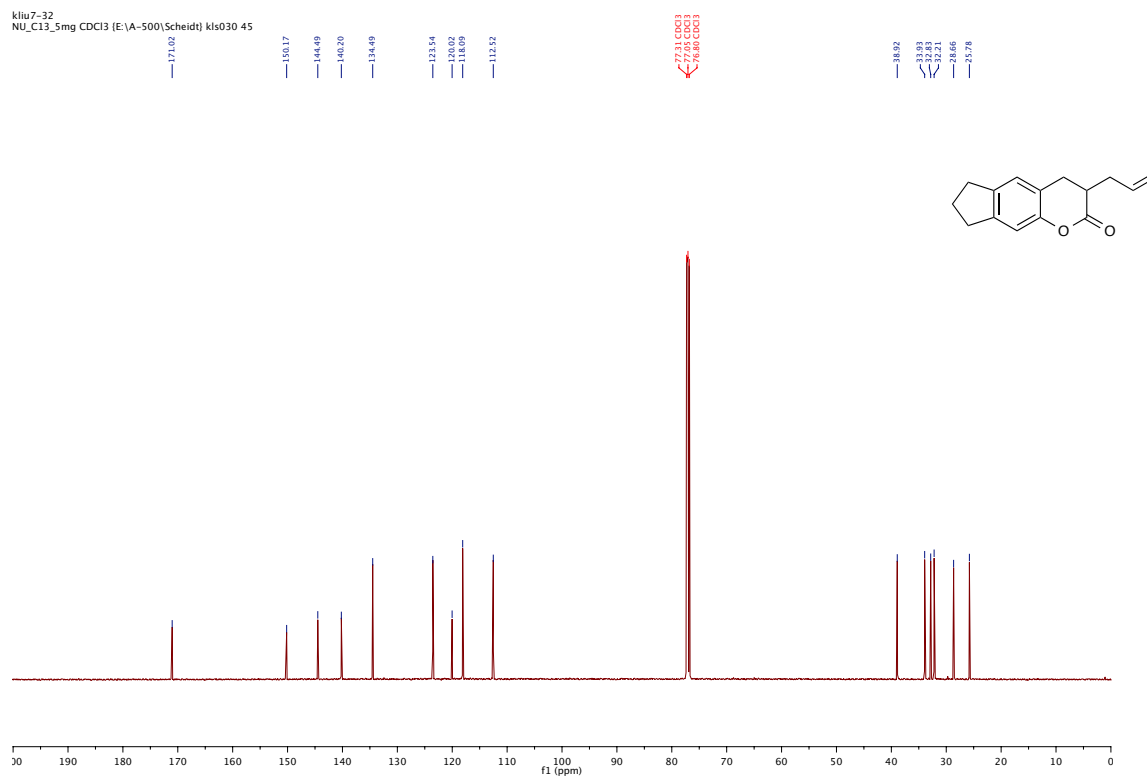

<sup>1</sup>H NMR Spectra of **2g** (500 MHz, CDCl<sub>3</sub>):

klu7-26  
 PROTON CDCl3 (E:\A-500\Scheidt) kls030 39

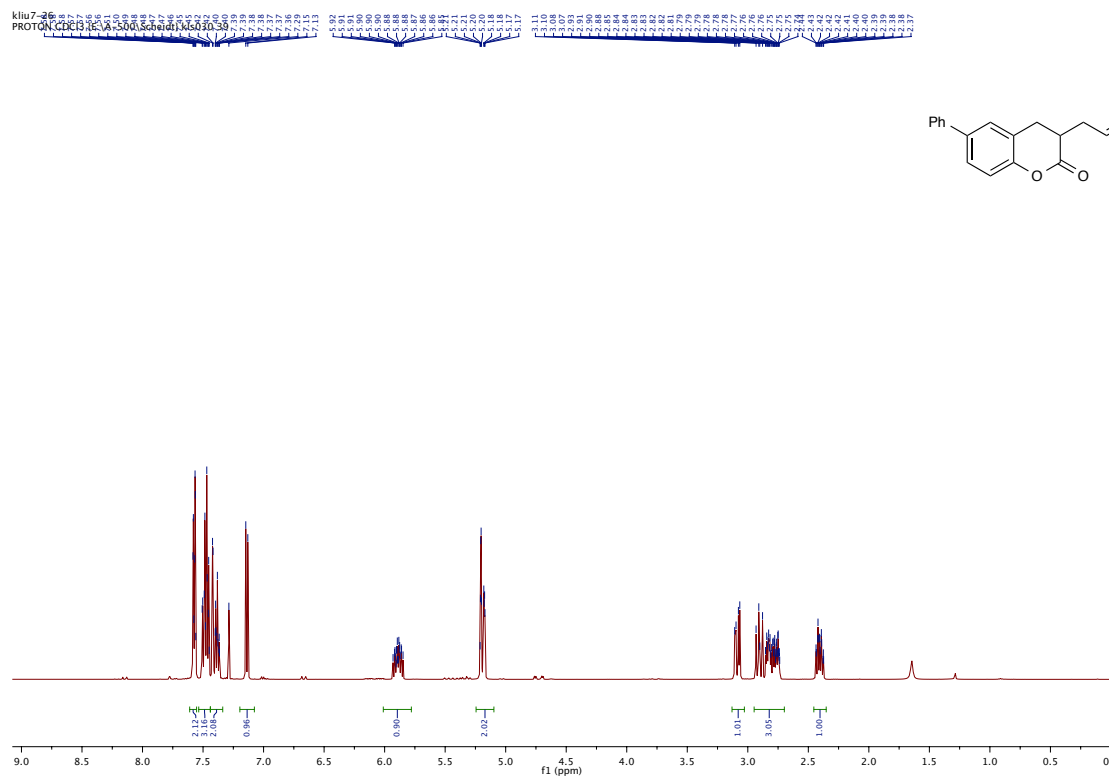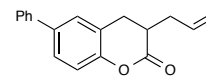<sup>13</sup>C NMR Spectra of **2g** (126 MHz, CDCl<sub>3</sub>):

klu7-26  
 NU\_C13\_5mg CDCl3 [E:\A-500\Scheidt) kls030 39

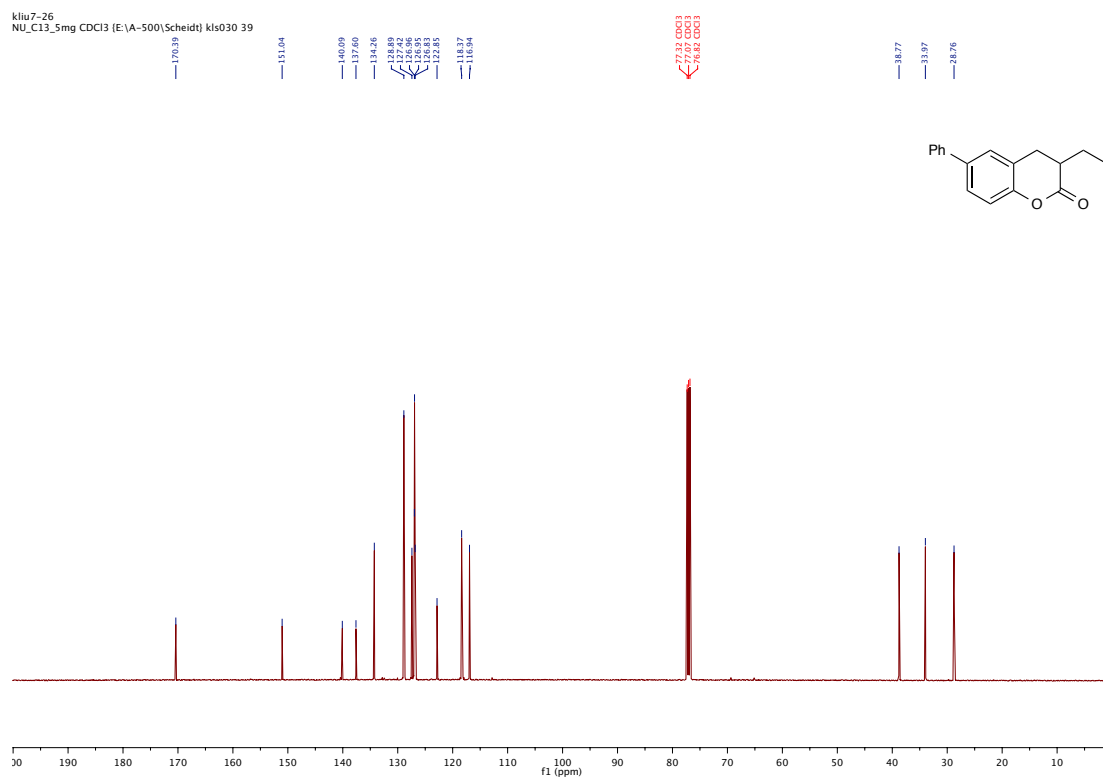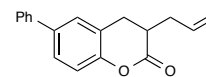

<sup>1</sup>H NMR Spectra of **2h** (500 MHz, CDCl<sub>3</sub>):

kliu9-57-2  
 PROTON CDCl3 /home/walkon/data/Scheidt kls030 52

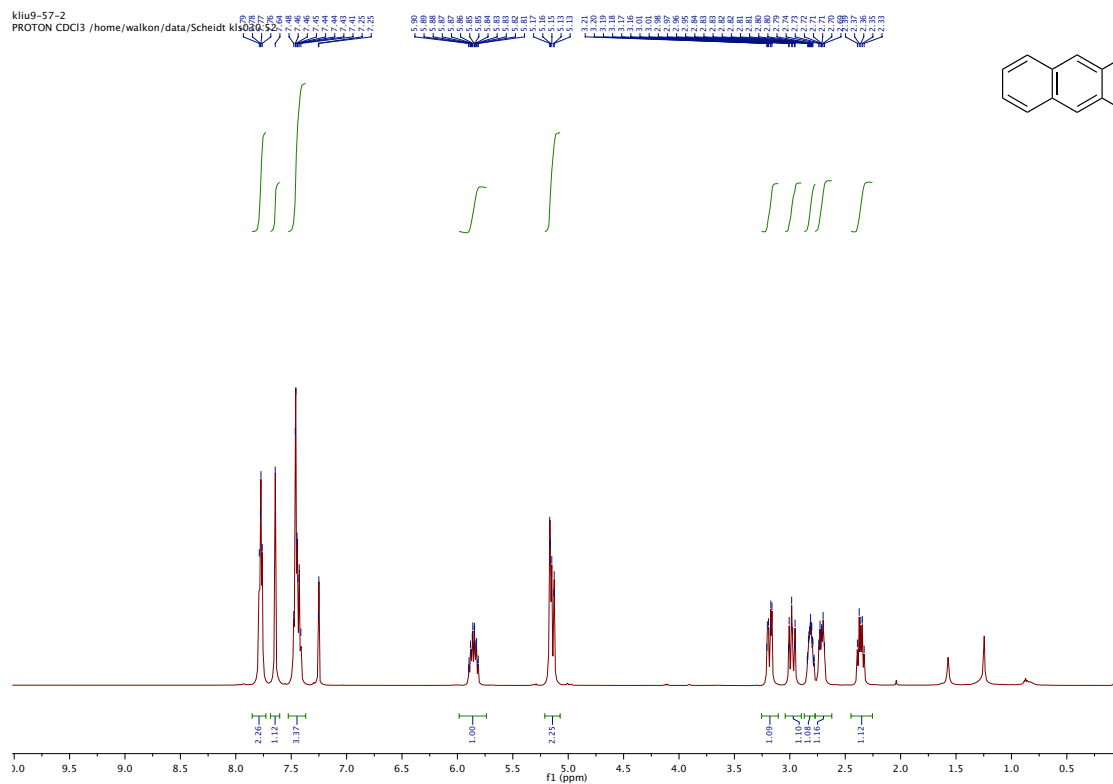<sup>13</sup>C NMR Spectra of **2h** (126 MHz, CDCl<sub>3</sub>):

kliu9-57-2  
 NU\_C13\_2mg CDCl3 /home/walkon/data/Scheidt kls030 52

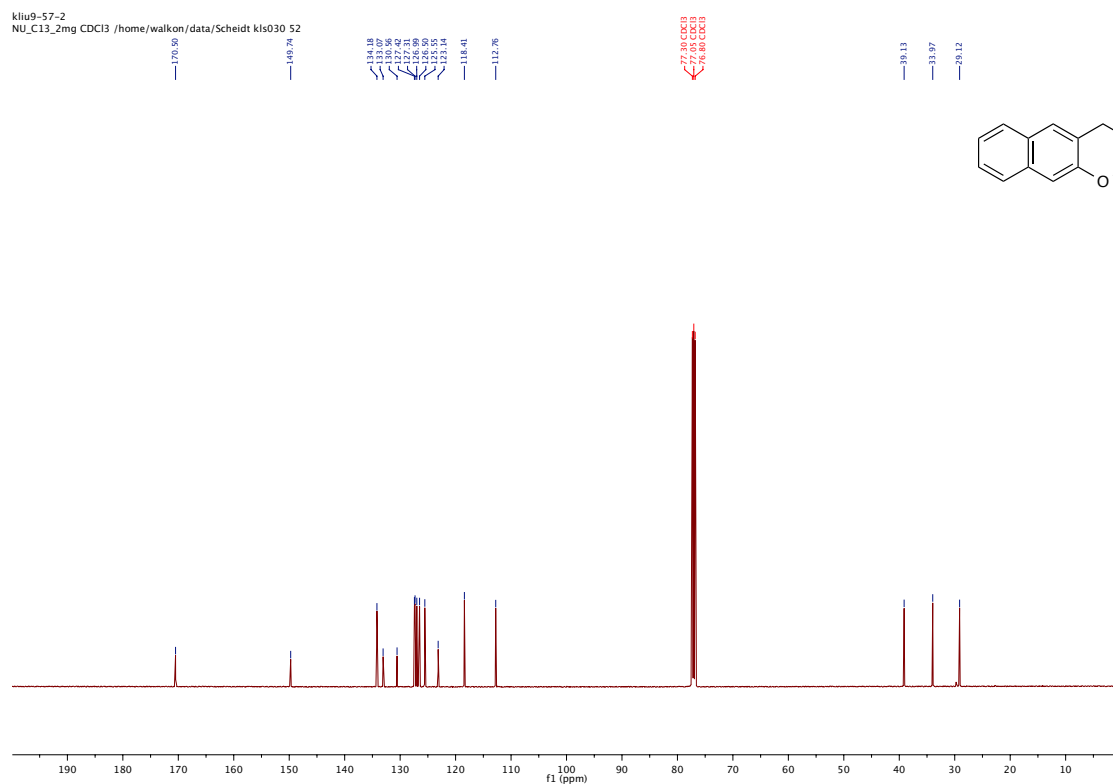

<sup>1</sup>H NMR Spectra of **2h** (500 MHz, CDCl<sub>3</sub>):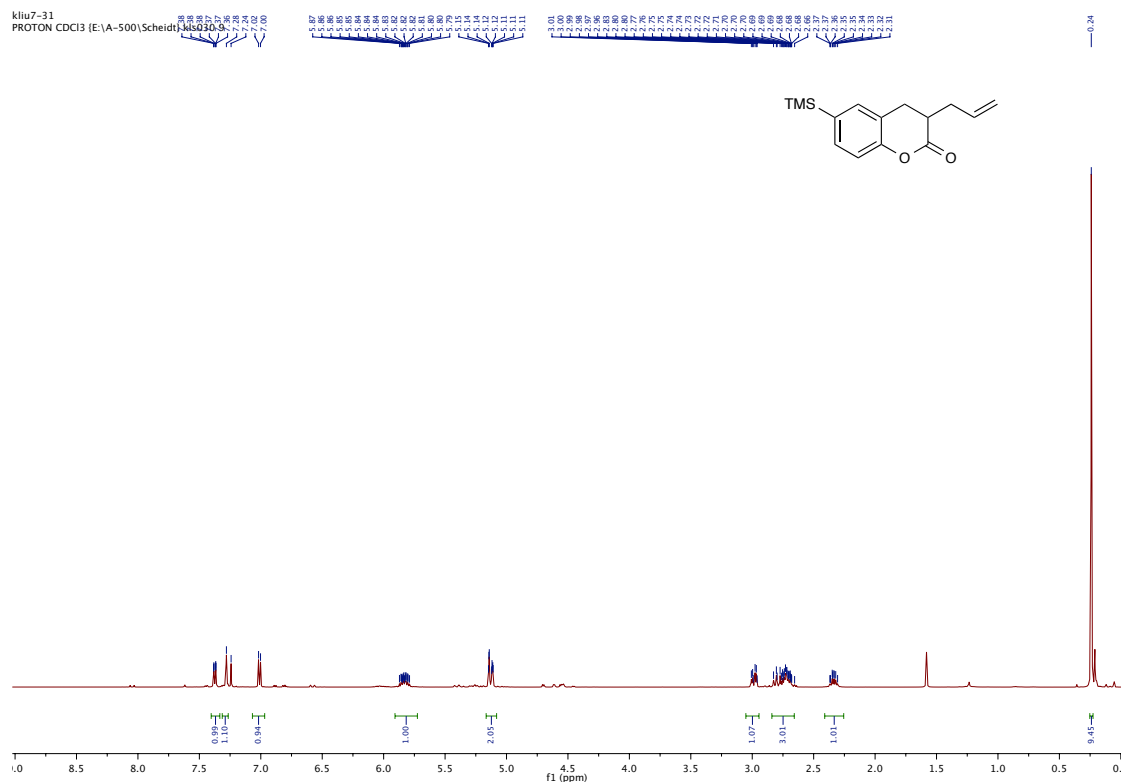<sup>13</sup>C NMR Spectra of **2i** (126 MHz, CDCl<sub>3</sub>):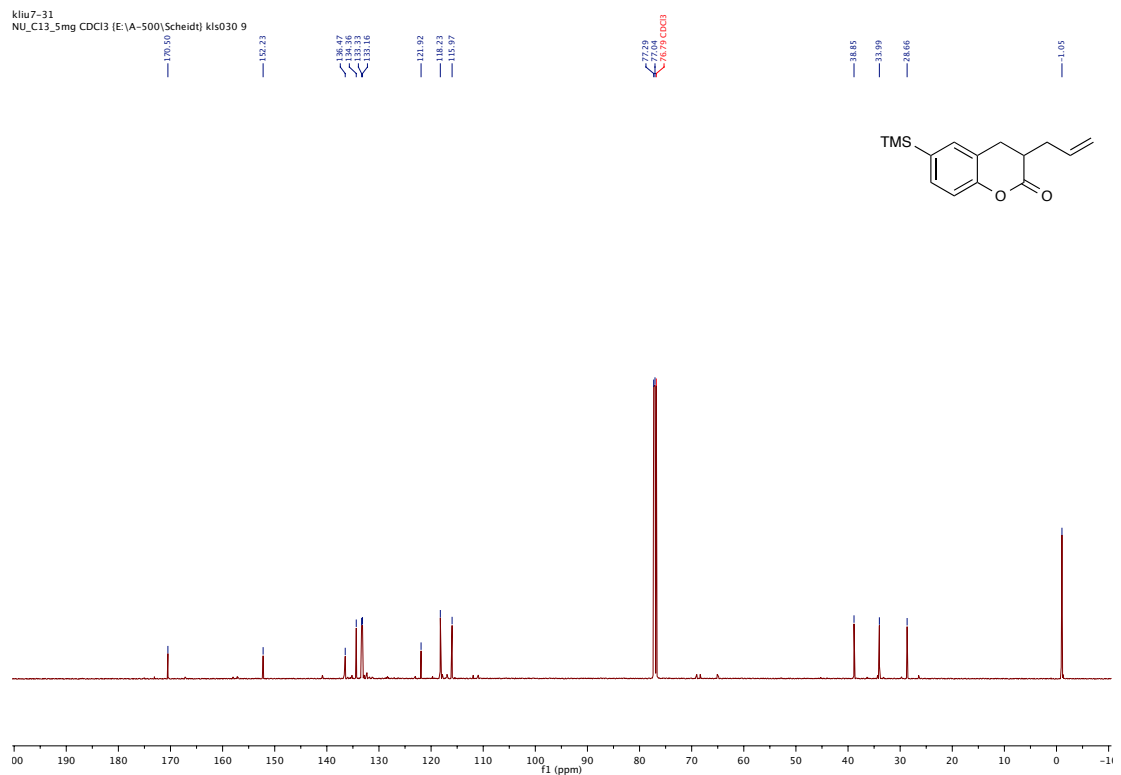

$^1\text{H}$  NMR Spectra of **2j** (500 MHz,  $\text{CDCl}_3$ ):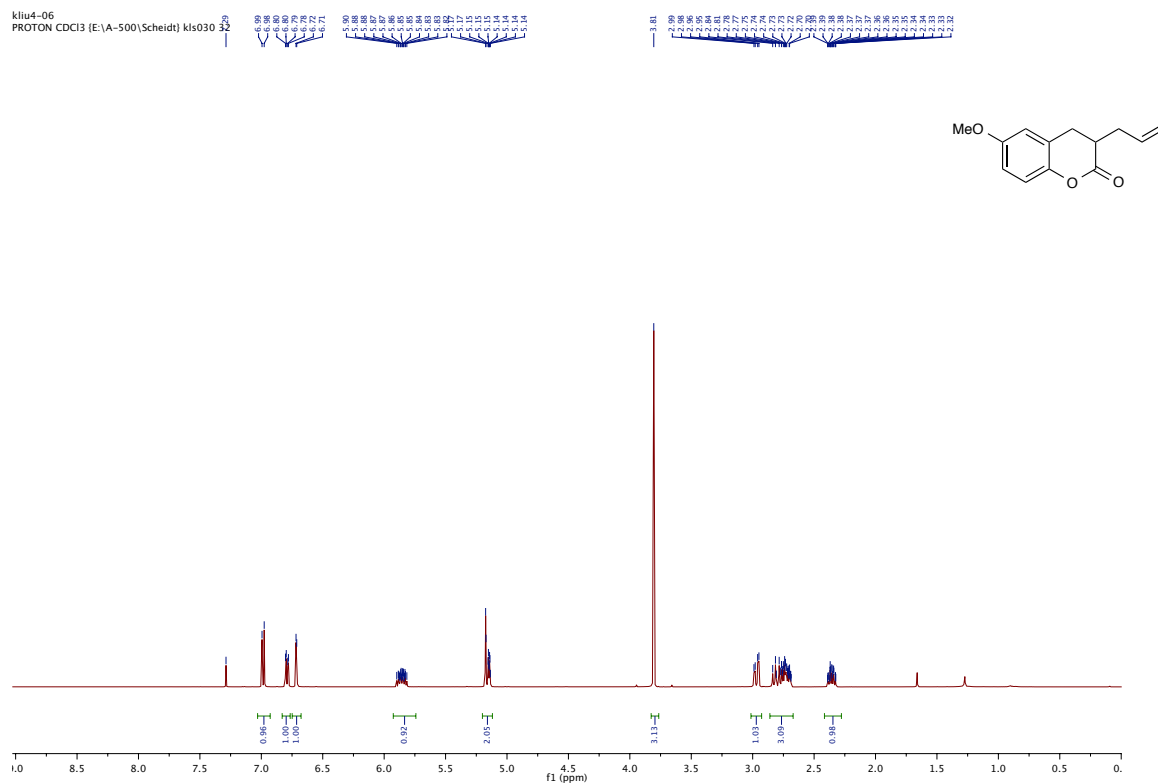 $^{13}\text{C}$  NMR Spectra of **2j** (126 MHz,  $\text{CDCl}_3$ ):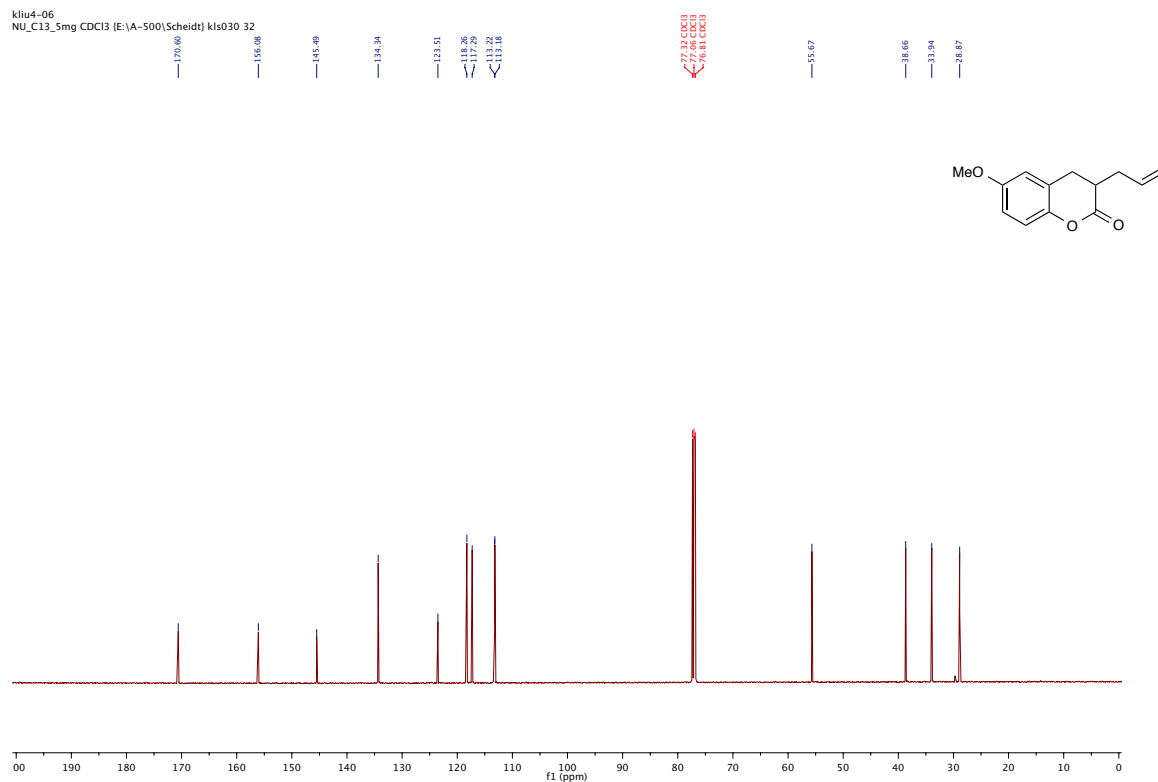

<sup>1</sup>H NMR Spectra of **2k** (500 MHz, CDCl<sub>3</sub>):klu7-27  
PROTON CDCl3 [E:\A-500\Scheidt) kls030 2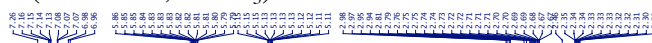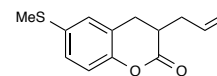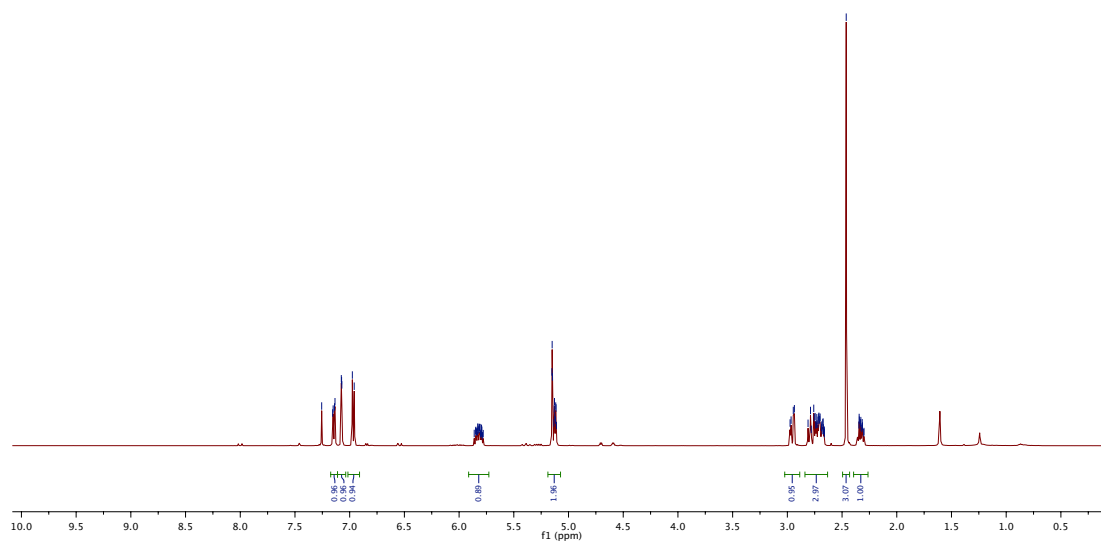<sup>13</sup>C NMR Spectra of **2k** (126 MHz, CDCl<sub>3</sub>):klu7-27  
NU\_C13\_5mg CDCl3 [E:\A-500\Scheidt) kls030 2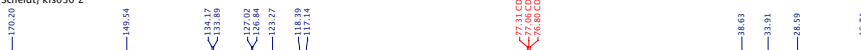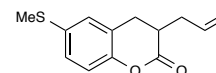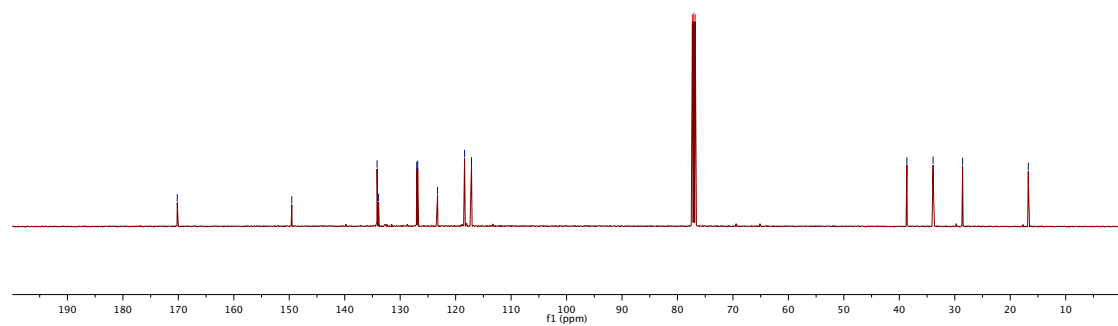

$^1\text{H}$  NMR Spectra of **21** (500 MHz,  $\text{CDCl}_3$ ):klu7-37  
PROTON CDCl3 (E:\A-500\Scheidt) kls030 49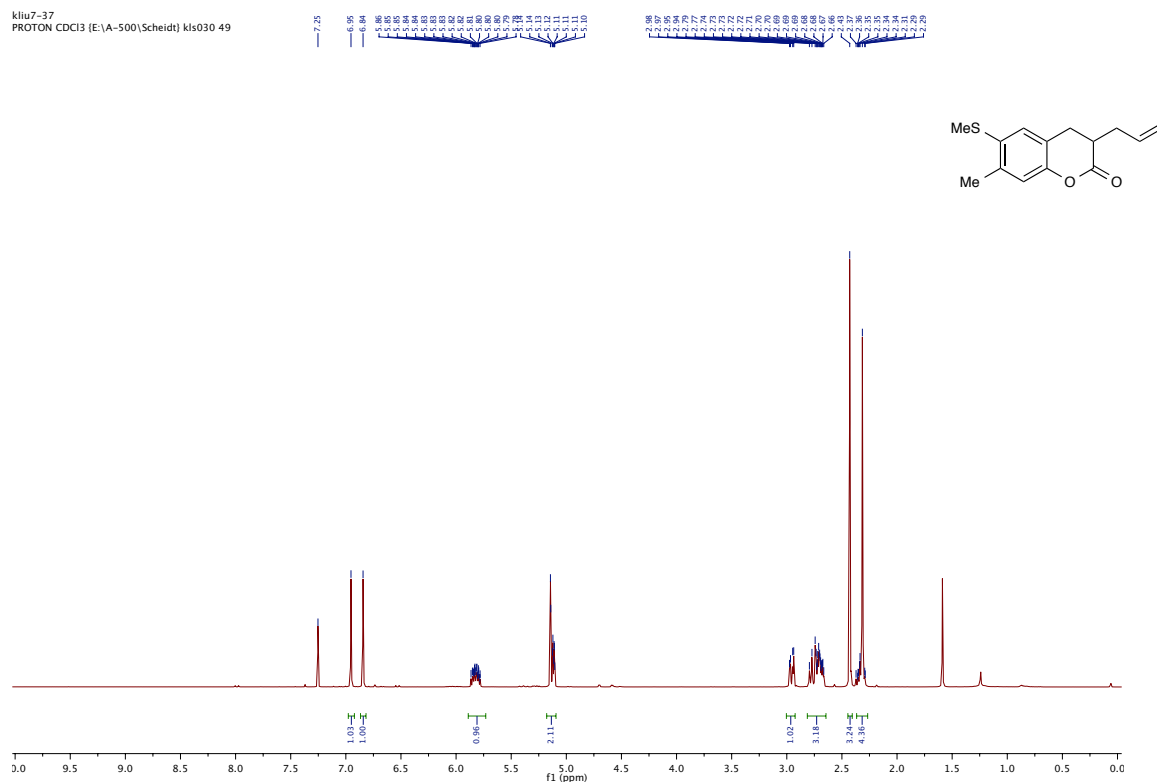 $^{13}\text{C}$  NMR Spectra of **21** (126 MHz,  $\text{CDCl}_3$ ):klu7-37  
NU\_C13\_5mg CDCl3 (E:\A-500\Scheidt) kls030 49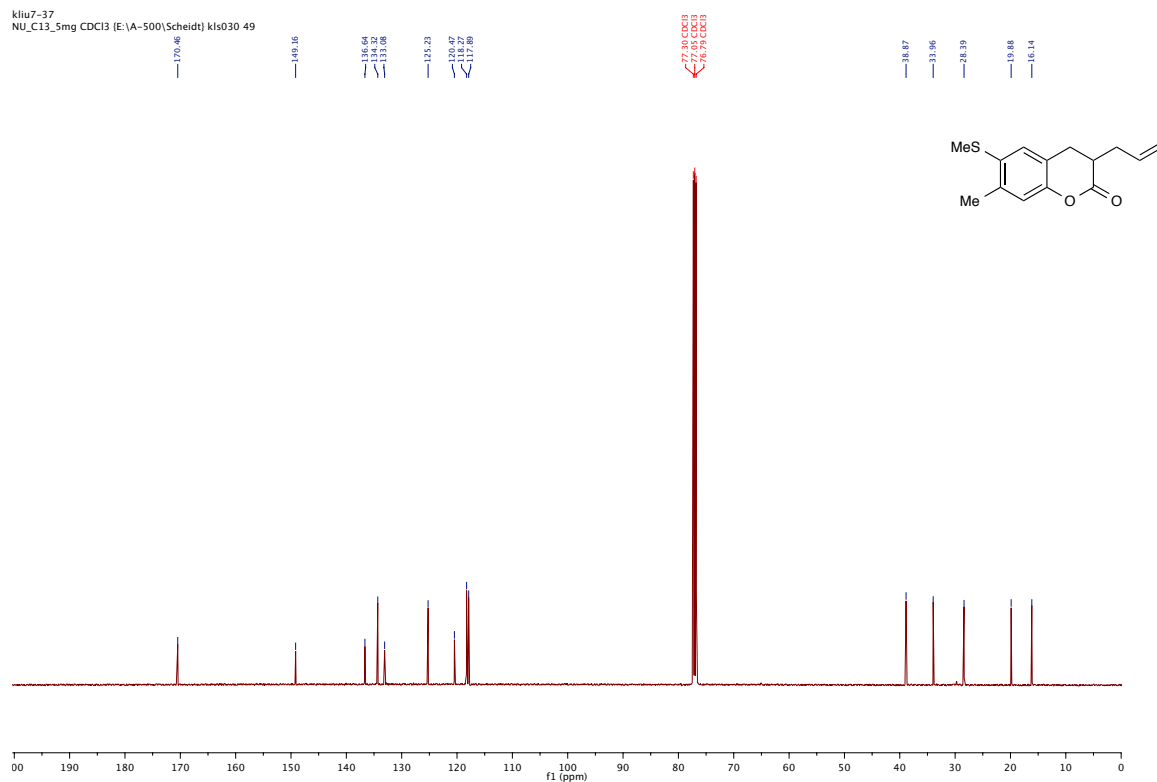



$^1\text{H}$  NMR Spectra of **2m** (500 MHz,  $\text{CDCl}_3$ ):klu6-70  
PROTON CDCl3 (E:\A-500\Scheidt) kls030 24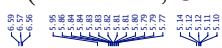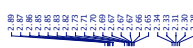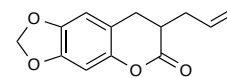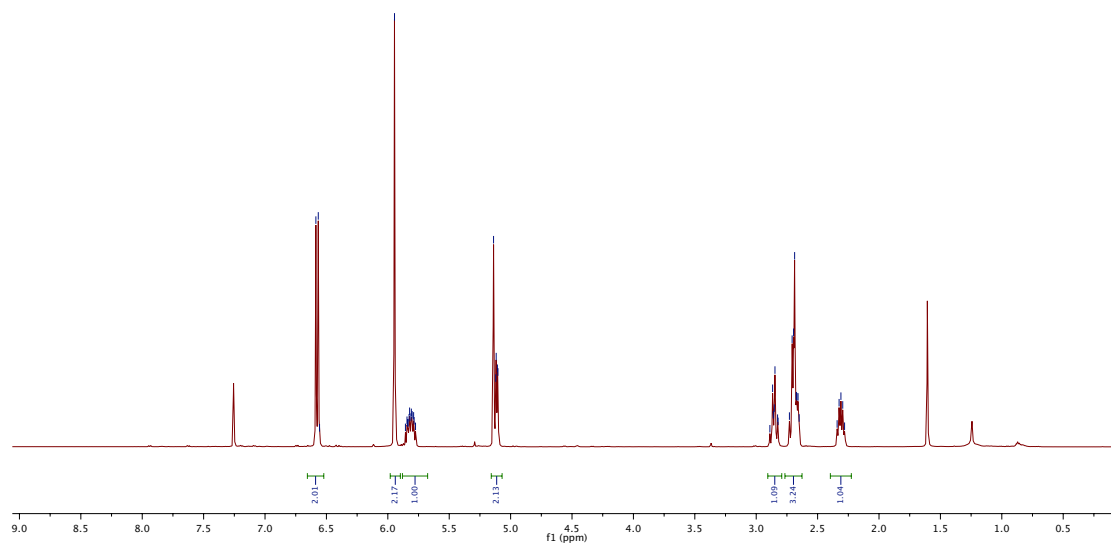 $^{13}\text{C}$  NMR Spectra of **2m** (126 MHz,  $\text{CDCl}_3$ ):klu6-70  
NU\_C13\_5mg CDCl3 (E:\A-500\Scheidt) kls030 24

170.44

147.08  
146.07  
144.07

134.31

118.27

114.53

107.23

101.58

98.31

77.00 CDCl3  
77.05 CDCl3  
76.80 CDCl3

38.63

33.85

28.49

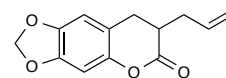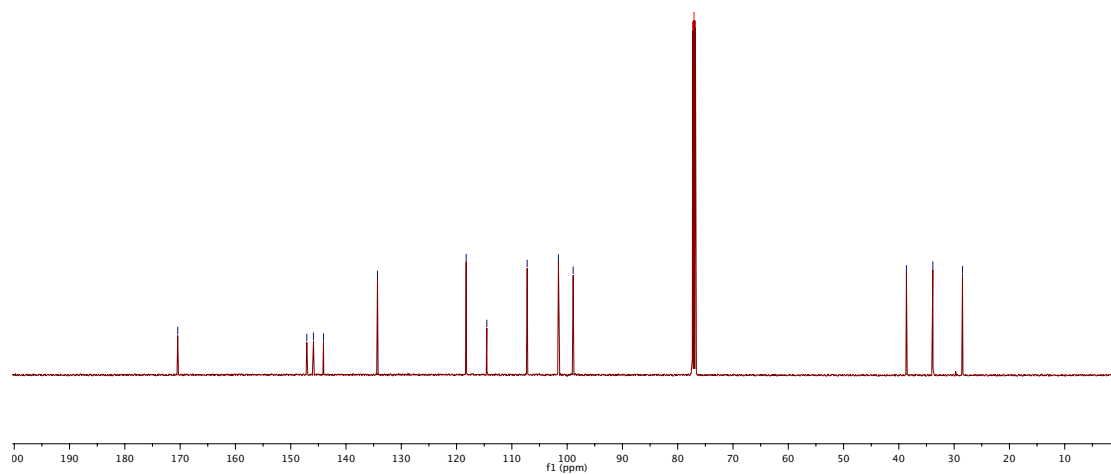



$^1\text{H}$  NMR Spectra of **2o** (500 MHz,  $\text{CDCl}_3$ ):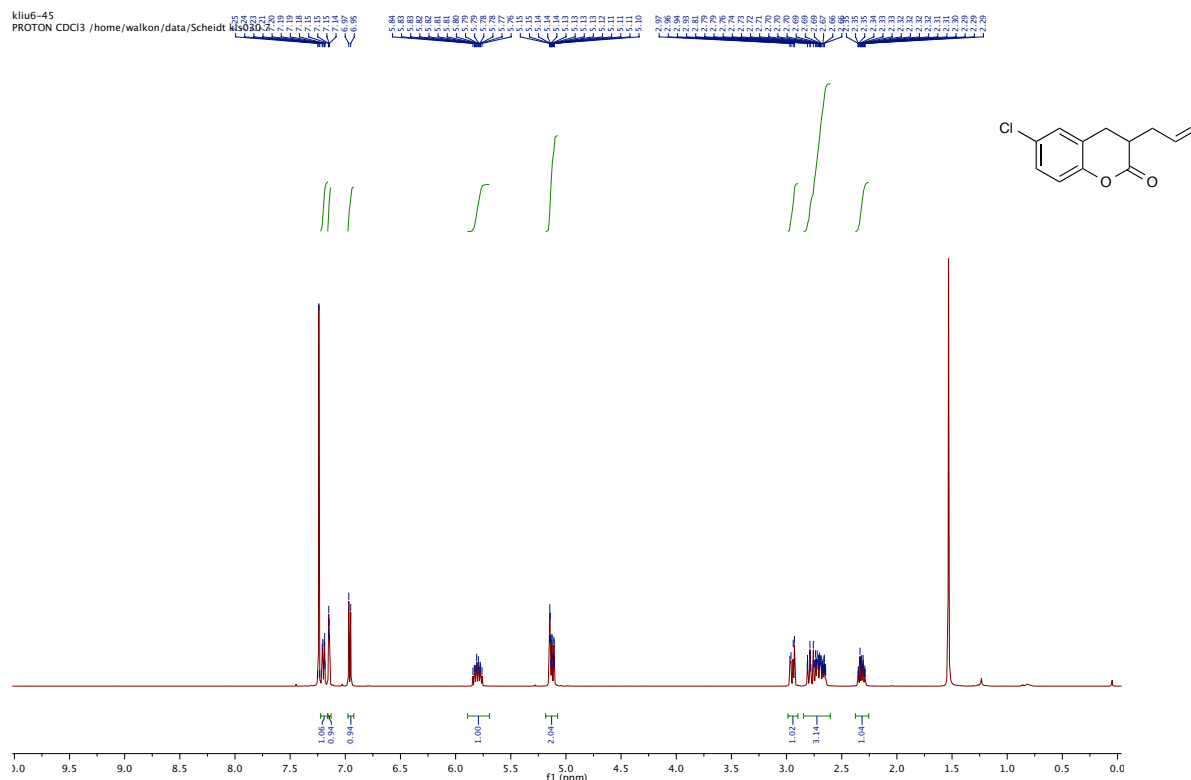 $^{13}\text{C}$  NMR Spectra of **2o** (126 MHz,  $\text{CDCl}_3$ ):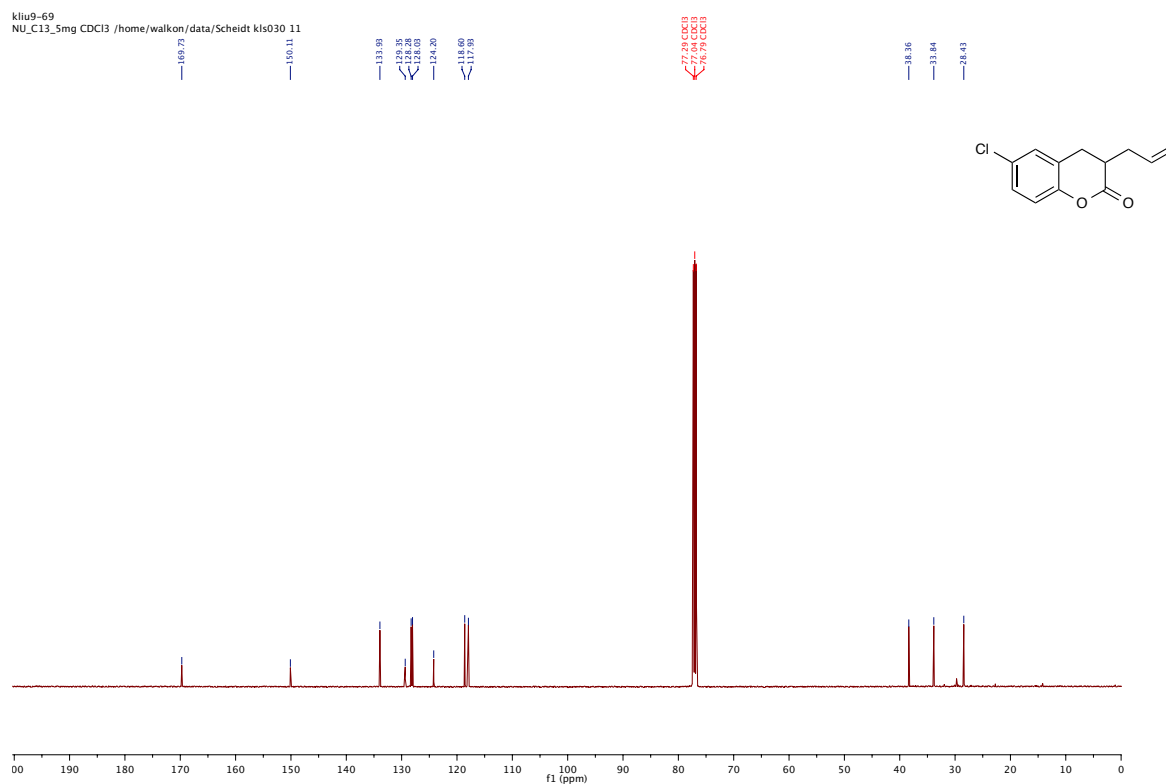

$^1\text{H}$  NMR Spectra of **9** and **10** (500 MHz,  $\text{CDCl}_3$ ):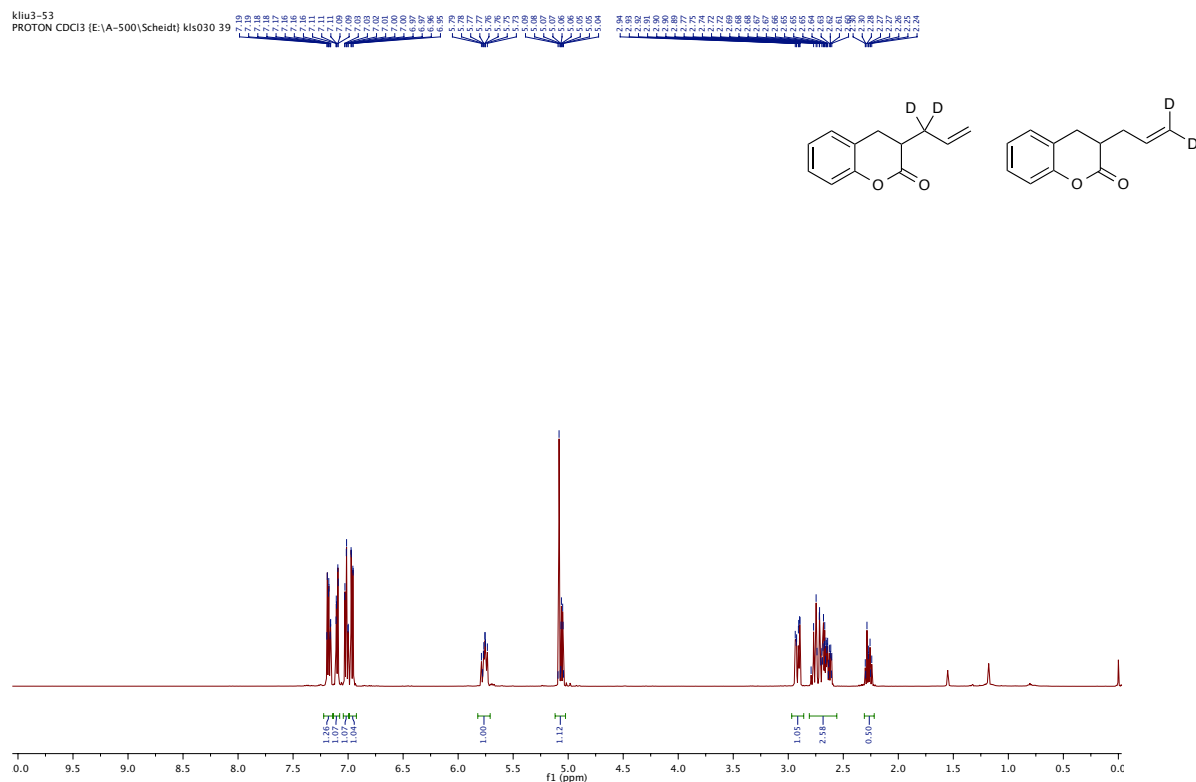 $^{13}\text{C}$  NMR Spectra of **9** and **10** (126 MHz,  $\text{CDCl}_3$ ):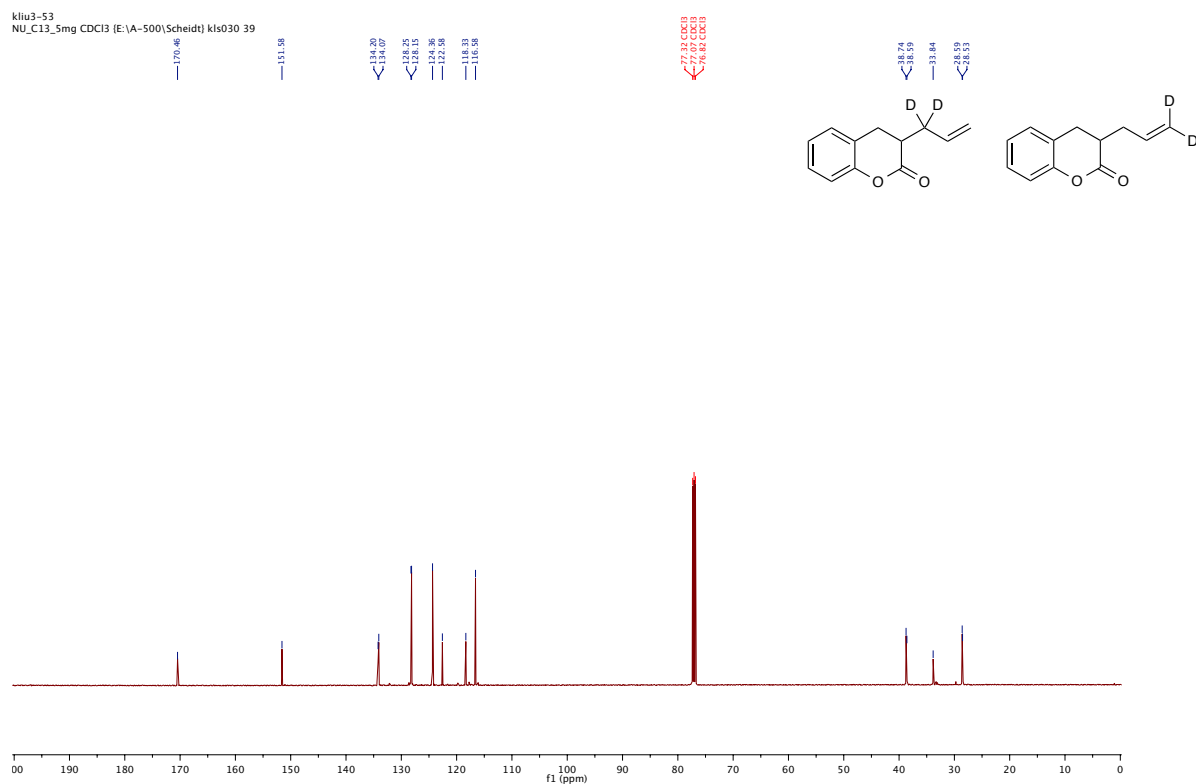

**Structure Determination of the dihydrocoumarin by X-ray analysis for 2o:**

The relative stereochemistry was determined by the X-ray diffraction. The dihydrocoumarin was recrystallized from  $\text{CH}_2\text{Cl}_2$  and hexane.

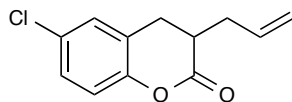

X-ray crystal structure of 3-allyl-6-chlorodihydrocoumarin:

X-ray diffraction was performed at 100 K and raw frame data were processed using SAINT. Molecular structures was solved using direct methods and refined on F2 by full-matrix least-square techniques. The GOF = 1.084 for 136 variables refined to  $R1 = 0.0267$  for 1613 reflections with  $I > 2\sigma(I)$ . A SADABS-2012/1 multi-scan absorption correction was performed. Further information can be found in the CIF file. This crystal structure was deposited in the Cambridge Crystallographic Data Centre and assigned as CCDC 969294.

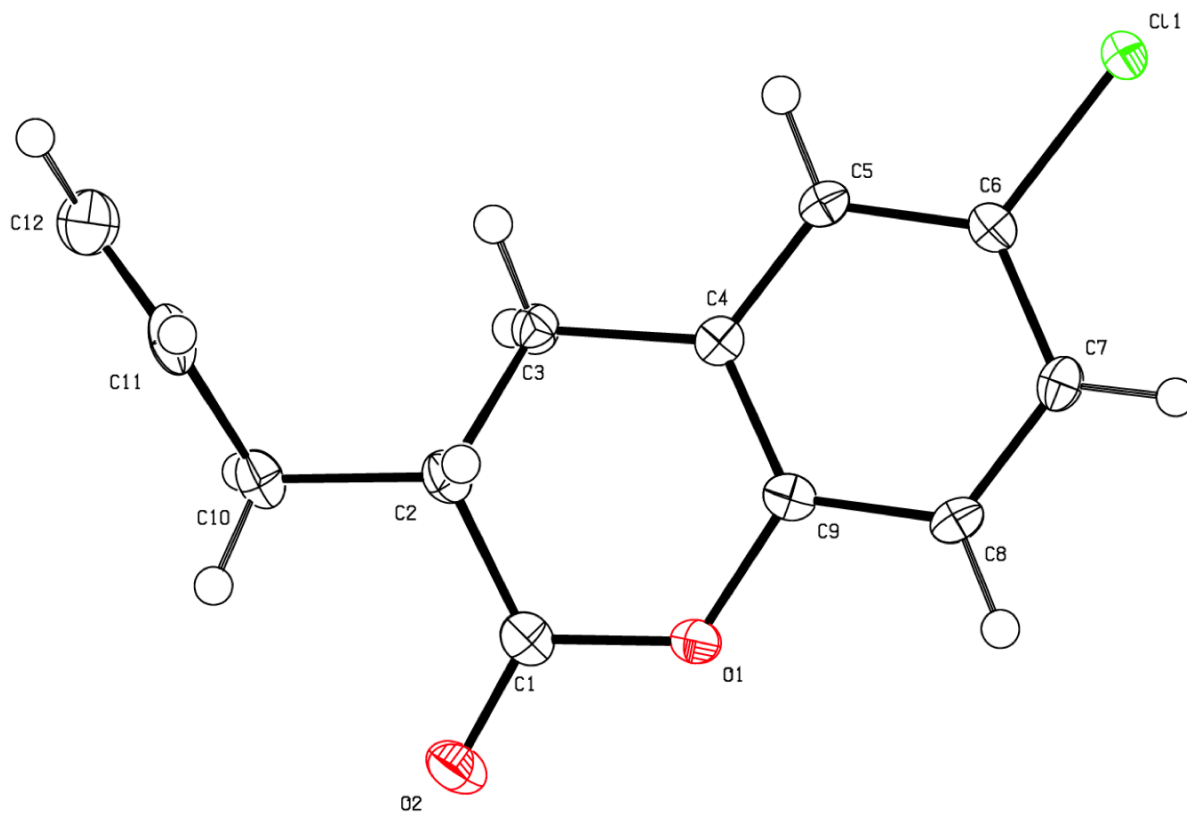

Supplement: NIHMS614762-supplement-ESI.pdf [file NIHMS614762-supplement-ESI.pdf]
